# Supplementary material for: The Impact of Prebunking Interventions Against Misinformation on Discrimination Ability and Criterion: An IPD Network Meta-Analysis
Source: Research Square preprint supplement (doi:10.21203/rs.3.rs-6660774/v1), 2025-05-26
Supplement: Supplementary file 1 [file 0010a61b20f0a08b662f5cac.docx]

**Supporting Information for**

**The Impact of Prebunking Interventions Against Misinformation on Discrimination Ability and Criterion: An IPD Network Meta-Analysis**

[**Table S1. Details of Literature Search Strategy** 3](#_Toc194322337)

[**Table S2. Literature Coding Details** 6](#_Toc194322338)

[**Table S3. Sample Sizes Across Analysis Datasets** 7](#_Toc194322339)

[**Table S4. Further Analysis of the Proportion of Missing Data** 8](#_Toc194322340)

[**Risk of Bias Assessment Results** 9](#_Toc194322341)

[**Figure S1. Proportion of Quality Assessment Ratings** 9](#_Toc194322342)

[**Figure S2. Details of Quality Assessment Ratings** 10](#_Toc194322343)

[**Table S5. Quality Assessment Checklist** 11](#_Toc194322344)

[**Table S6. Parameter Details and Model Fit Results** 149](#_Toc194322345)

[**Complete Results of Study** 154](#_Toc194322346)

[**Table S7. Preliminary outcomes** 154](#_Toc194322347)

[**Table S8. Further outcomes** 155](#_Toc194322348)

[**Table S9. Extended outcomes** 164](#_Toc194322349)

[**Table S10. Sensitivity analysis results** 166](#_Toc194322350)

[**Publishing Biased Results** 170](#_Toc194322351)

[**Figure S3.** Funnel plot of publication bias for discriminatory ability in preliminary analyses 170](#_Toc194322352)

[**Figure S4.** Funnel plot of publication bias for discriminant criteria in preliminary analyses 170](#_Toc194322353)

[**Figure S5.** Funnel plot of publication bias for discriminatory ability in extended analyses 171](#_Toc194322354)

[**Figure S6.** Funnel plot of publication bias for discriminatory criteria inextended analyses 171](#_Toc194322355)

**Table S1. Details of Literature Search Strategy**

| **Search date** | **Search databases** | **Search keywords** | **Number of searches** |
| --- | --- | --- | --- |
| **23 January 2024** | Web of Science | **(“fake news” OR “misinformation” OR “disinformation” OR “rumor*” OR “rumour*”) AND (“intervent*” OR “correct*” OR “debunk*” OR “fight*” OR “detect*” OR “refut*” OR “resolution” OR “Strateg*” OR “against”) (Title) OR (“fake news” OR “misinformation” OR “disinformation” OR “rumor*” OR “rumour*”) AND (“intervent*” OR “correct*” OR “debunk*” OR “fight*” OR “detect*” OR “refut*” OR “resolution” OR “Strateg*” OR “against”)** | 6909 |
| **23 January 2024** | ProQuest | **AB,TI(("fake news" OR misinformation OR disinformation OR rumor* OR rumour*) AND (intervent* OR correct* OR debunk* OR fight* OR detect* OR refut* OR resolution OR strateg* OR against))** | 1480 |
| **23 January 2024** | PubMed | ("fake news"[Title/Abstract] OR "misinformation"[Title/Abstract] OR "disinformation"[Title/Abstract] OR "rumor*"[Title/Abstract] OR "rumour*"[Title/Abstract]) AND ("intervent*"[Title/Abstract] OR "correct*"[Title/Abstract] OR "debunk*"[Title/Abstract] OR "fight*"[Title/Abstract] OR "detect*"[Title/Abstract] OR "refut*"[Title/Abstract] OR "resolution"[Title/Abstract] OR "Strateg*"[Title/Abstract] OR "against"[Title/Abstract]) | 3842 |
| **23 January 2024** | EBSCO | **AB ("fake news" OR misinformation OR disinformation OR rumor* OR rumour*) OR TI ("fake news" OR misinformation OR disinformation OR rumor* OR rumour*)) AND (AB (intervent* OR correct* OR debunk* OR fight* OR detect* OR refut* OR resolution OR strateg* OR against) OR TI (intervent* OR correct* OR debunk* OR fight* OR detect* OR refut* OR resolution OR strateg* OR against))** | 5599 |
| **21 October 2024** | Web of Science | **(“fake news” OR “misinformation” OR “disinformation” OR “rumor*” OR “rumour*”) AND (“intervent*” OR “correct*” OR “debunk*” OR “fight*” OR “detect*” OR “refut*” OR “resolution” OR “Strateg*” OR “against”) (Title) OR (“fake news” OR “misinformation” OR “disinformation” OR “rumor*” OR “rumour*”) AND (“intervent*” OR “correct*” OR “debunk*” OR “fight*” OR “detect*” OR “refut*” OR “resolution” OR “Strateg*” OR “against”) (Abstract) AND 2024-01-23/2050-01-01 (Publication Date)** | **5842** |
| **21 October 2024** | ProQuest | **AB,TI(("fake news" OR misinformation OR disinformation OR rumor* OR rumour*) AND (intervent* OR correct* OR debunk* OR fight* OR detect* OR refut* OR resolution OR strateg* OR against)) AND PD(20240123-20500101)** | **84** |
| **21 October 2024** | PubMed | (("fake news"[Title/Abstract] OR "misinformation"[Title/Abstract] OR "disinformation"[Title/Abstract] OR "rumor*"[Title/Abstract] OR "rumour*"[Title/Abstract]) AND ("intervent*"[Title/Abstract] OR "correct*"[Title/Abstract] OR "debunk*"[Title/Abstract] OR "fight*"[Title/Abstract] OR "detect*"[Title/Abstract] OR "refut*"[Title/Abstract] OR "resolution"[Title/Abstract] OR "Strateg*"[Title/Abstract] OR "against"[Title/Abstract])) AND (("2024/01/23"[Date - Publication] : "2050/01/01"[Date - Publication])) | **625** |
| **21 October 2024** | EBSCO | **(AB ("fake news" OR misinformation OR disinformation OR rumor* OR rumour*) OR TI ("fake news" OR misinformation OR disinformation OR rumor* OR rumour*)) AND (AB (intervent* OR correct* OR debunk* OR fight* OR detect* OR refut* OR resolution OR strateg* OR against) OR TI (intervent* OR correct* OR debunk* OR fight* OR detect* OR refut* OR resolution OR strateg* OR against)) AND (DT 20240123-20500101)** | **213** |

To ensure comprehensive coverage of eligible studies, a two-stage literature search was conducted. The initial search (**23 January 2024**) was performed to identify relevant studies, which were subsequently screened, coded, and reanalyzed using a signal detection theory (SDT) framework. Given that a substantial amount of time was required for data processing and reanalysis—particularly the SDT-based calculations of discrimination ability and criterion, and in light of the possibility that additional relevant studies may have been published during this period, a second search (21 October 2024) was conducted prior to final analyses. This step ensured that the most recent evidence was incorporated into the individual participant data (IPD) meta-analysis.

**Table S2. Literature Coding Details**

Literature coding details on the open platform OSF. https://osf.io/qz9fj/?view_only=70cdfe5ad3104e6bb441e9cee25b82ee

**Table S3. Sample Sizes Across Analysis Datasets**

| Analysis Dataset | Preliminary Analysis | Further Analysis | Extended Analysis | Sensitivity Analysis |
| --- | --- | --- | --- | --- |
|
| Total | 19260 | 19260 | 30530 | 12331 |
| Control | 9228 | 9228 | 13343 | 6068 |
| Accuracy prompts | 1150 | 1150 | 1150 | 1134 |
| Financial incentives | 1246 | 1246 | 1246 | 1235 |
| Media literacy | 5015 | 5015 | 7894 | 2450 |
| Writing letters to elders | 1458 | 1458 | 2286 | 1444 |
| Bias awareness | 377 | 377 | 377 |  |
| Feedback | 57 | 57 | 57 |  |
| Inoculation strategies | 729 | 729 | 2711 |  |
| Inoculation+Feedback |  |  | 1466 |  |

Following the principles of signal detection theory, different continuous scoring methods were standardized into categorical scoring approaches. In cases where studies used odd continuous scoring methods, median-based scoring results were recoded as missing and participants with missing values were excluded from the analyses. The overall attrition rate was 27.68%.

**Table S4. Further Analysis of the Proportion of Missing Data**

| **Variable** | **Missing_Proportion** |
| --- | --- |
| study | 0% |
| participant | 0% |
| gender | 0% |
| age | 2% |
| education | 3% |
| country | 3% |
| CRT | 36% |
| topics | 0% |
| image | 0% |
| likeforward | 0% |
| consistency | 0% |
| number | 0% |
| likert | 0% |
| group | 0% |
| phase | 0% |
| dprime | 0% |
| crit | 0% |
| region | 3% |

**Risk of Bias Assessment Results**

**Figure S1. Proportion of Quality Assessment Ratings**

**Figure S2. Details of Quality Assessment Ratings**

**Table S5. Quality Assessment Checklist**

| **Unique ID** | 1 | **Study ID** | 1 | **Assessor** | Bai |
| --- | --- | --- | --- | --- | --- |
| **Ref or Label** |  | **Aim** | assignment to intervention (the 'intention-to-treat' effect) | |  |
| **Experimental** | Writing letters to elders | **Comparator** | Control | **Source** | Journal article(s) |
| **Outcome** | discrimination ability and discrimination criterion | **Results** |  | **Weight** | 1 |
| **Domain** | **Signalling question** |  |  | **Response** | **Comments** |
| **Bias arising from the randomization process** | 1.1 Was the allocation sequence random? |  |  | Y | Among them, 801 reached the randomized intervention or control materials.  After consenting, participants first filled out the “bullshit” receptivity scale 54, demographics, and then proceeded to their randomly assigned condition. |
|  | 1.2 Was the allocation sequence concealed until participants were enrolled and assigned to interventions? | | | PY |  |
|  | 1.3 Did baseline differences between intervention groups suggest a problem with the randomization process? | | | N | Considering the above-mentioned individual differences, there were no baseline differences between the treatment and the control groups (p > 0.13). |
|  | **Risk of bias judgement** |  |  | **Low** |  |
| **Bias due to deviations from intended interventions** | 2.1.Were participants aware of their assigned intervention during the trial? | |  | N | The structure of the control condition was very similar to the intervention.  The researchers had to know what group the subjects were in before they could intervene. |
|  | 2.2.Were carers and people delivering the interventions aware of participants' assigned intervention during the trial? | | | Y |  |
|  | 2.3. If Y/PY/NI to 2.1 or 2.2: Were there deviations from the intended intervention that arose because of the experimental context? | | | PN |  |
|  | 2.4 If Y/PY to 2.3: Were these deviations likely to have affected the outcome? | |  | NA |  |
|  | 2.5. If Y/PY/NI to 2.4: Were these deviations from intended intervention balanced between groups? | | | NA |  |
|  | 2.6 Was an appropriate analysis used to estimate the effect of assignment to intervention? | | | PY | Generally speaking, researchers will remove participants who have failed manipulative tests during analysis. |
|  | 2.7 If N/PN/NI to 2.6: Was there potential for a substantial impact (on the result) of the failure to analyse participants in the group to which they were randomized? | | | NA |  |
|  | **Risk of bias judgement** |  |  | **Low** |  |
| **Bias due to missing outcome data** | 3.1 Were data for this outcome available for all, or nearly all, participants randomized? | | | Y | In sum, though the number of participants in the follow-up was somewhatsmaller than expected, the overall attrition was not high. |
|  | 3.2 If N/PN/NI to 3.1: Is there evidence that result was not biased by missing outcome data? | | | NA |  |
|  | 3.3 If N/PN to 3.2: Could missingness in the outcome depend on its true value? | |  | NA |  |
|  | 3.4 If Y/PY/NI to 3.3: Is it likely that missingness in the outcome depended on its true value? | | | NA |  |
|  | **Risk of bias judgement** |  |  | **Low** |  |
| **Bias in measurement of the outcome** | 4.1 Was the method of measuring the outcome inappropriate? | |  | N | we used the protocol of Pennycook and Rand57 by asking participants to evaluate the accuracy of eight carefully pretested and culturally adjusted real and eight fake news items |
|  | 4.2 Could measurement or ascertainment of the outcome have differed between intervention groups? | | | N | Fake news accuracy To assess fake news accuracy ratings, we used the protocol of Pennycook and Rand57 by asking participants to evaluate the accuracy of eight carefully pretested and culturally adjusted real and eight fake news items |
|  | 4.3 Were outcome assessors aware of the intervention received by study participants? | | | PY | Post-test after intervention, subject may know. |
|  | 4.4 If Y/PY/NI to 4.3: Could assessment of the outcome have been influenced by knowledge of intervention received? | | | N | It is self-reported by the subject, not the subject. |
|  | 4.5 If Y/PY/NI to 4.4: Is it likely that assessment of the outcome was influenced by knowledge of intervention received? | | | NA |  |
|  | **Risk of bias judgement** |  |  | **Low** |  |
| **Bias in selection of the reported result** | 5.1 Were the data that produced this result analysed in accordance with a pre-specified analysis plan that was finalized before unblinded outcome data were available for analysis? | | | NI |  |
|  | 5.2 ... multiple eligible outcome measurements (e.g. scales, definitions, time points) within the outcome domain? | | | NI |  |
|  | 5.3 ... multiple eligible analyses of the data? |  |  | NI |  |
|  | **Risk of bias judgement** |  |  | **Low** | This study conducted a secondary analysis of the dependent variables based on individual original data. |
| **Overall bias** | **Risk of bias judgement** |  |  | **Low** |  |
|  |  |  |  |  |  |
|  |  |  |  |  |  |
| **Unique ID** | 2 | **Study ID** | 2 | **Assessor** | Bai |
| **Ref or Label** |  | **Aim** | assignment to intervention (the 'intention-to-treat' effect) | |  |
| **Experimental** | Media literacy | **Comparator** | Control | **Source** | Journal article(s) |
| **Outcome** | discrimination ability and discrimination criterion | **Results** |  | **Weight** | 1 |
| **Domain** | **Signalling question** |  |  | **Response** | **Comments** |
| **Bias arising from the randomization process** | 1.1 Was the allocation sequence random? |  |  | Y | Respondents were randomly assigned to exposure to the media literacy intervention or to a con-trol condition in which no information was shown (simple random assignment with 50% assignment probability via the YouGov platform). |
|  | 1.2 Was the allocation sequence concealed until participants were enrolled and assigned to interventions? | | | PY |  |
|  | 1.3 Did baseline differences between intervention groups suggest a problem with the randomization process? | | | N | We find no evidence of imbalance on observable measures across conditions (Table C3). |
|  | **Risk of bias judgement** |  |  | **Low** |  |
| **Bias due to deviations from intended interventions** | 2.1.Were participants aware of their assigned intervention during the trial? | |  | Y | Respondents were randomly assigned to exposure to the media literacy intervention or to a con-trol condition in which no information was shown (simple random assignment with 50% assignment probability via the YouGov platform).  Respondents were randomly assigned to exposure to the media literacy intervention or to a control condition in which no information was shown.We compare the characteristics of respondents who would successfully take the treatment only if assigned to it (“compliers”) to those who would not even if assigned to treatment (“never takers”). |
|  | 2.2.Were carers and people delivering the interventions aware of participants' assigned intervention during the trial? | | | PY |  |
|  | 2.3. If Y/PY/NI to 2.1 or 2.2: Were there deviations from the intended intervention that arose because of the experimental context? | | | PN | Crucially, we find no statistically significant evidence that respondents who take the treatment dif-fer in their baseline propensity to visit untrustworthy websites compared to those who do not (analysis conducted among par-ticipants for whom presurvey behavioral data are available; see SI Appendix, section A for details). |
|  | 2.4 If Y/PY to 2.3: Were these deviations likely to have affected the outcome? | |  | NA |  |
|  | 2.5. If Y/PY/NI to 2.4: Were these deviations from intended intervention balanced between groups? | | | NA |  |
|  | 2.6 Was an appropriate analysis used to estimate the effect of assignment to intervention? | | | PY | researchers will remove participants who have failed manipulative tests during analysis. |
|  | 2.7 If N/PN/NI to 2.6: Was there potential for a substantial impact (on the result) of the failure to analyse participants in the group to which they were randomized? | | | NA |  |
|  | **Risk of bias judgement** |  |  | **Low** |  |
| **Bias due to missing outcome data** | 3.1 Were data for this outcome available for all, or nearly all, participants randomized? | | | Y | attrition between waves was not significantly related to treatment status |
|  | 3.2 If N/PN/NI to 3.1: Is there evidence that result was not biased by missing outcome data? | | | NA |  |
|  | 3.3 If N/PN to 3.2: Could missingness in the outcome depend on its true value? | |  | NA |  |
|  | 3.4 If Y/PY/NI to 3.3: Is it likely that missingness in the outcome depended on its true value? | | | NA |  |
|  | **Risk of bias judgement** |  |  | **Low** |  |
| **Bias in measurement of the outcome** | 4.1 Was the method of measuring the outcome inappropriate? | |  | N | All of the headlines were published by actual news sources or circulated on Facebook or WhatsApp within 6 mo of the respec-tive survey, and a portion of the headlines were rated as false by at least one third-party fact-checking organization. The order of the headlines was randomized within wave for each respondent. We selected these stories from hyperpartisan sources identified in prior work (58) (SI Appendix, section H). |
|  | 4.2 Could measurement or ascertainment of the outcome have differed between intervention groups? | | | N | respondents evaluated 16 different headlines that varied across multiple dimensions: |
|  | 4.3 Were outcome assessors aware of the intervention received by study participants? | | | PN | Collection is automatically collected through online survey sites. |
|  | 4.4 If Y/PY/NI to 4.3: Could assessment of the outcome have been influenced by knowledge of intervention received? | | | NA |  |
|  | 4.5 If Y/PY/NI to 4.4: Is it likely that assessment of the outcome was influenced by knowledge of intervention received? | | | NA |  |
|  | **Risk of bias judgement** |  |  | **Low** |  |
| **Bias in selection of the reported result** | 5.1 Were the data that produced this result analysed in accordance with a pre-specified analysis plan that was finalized before unblinded outcome data were available for analysis? | | | NI |  |
|  | 5.2 ... multiple eligible outcome measurements (e.g. scales, definitions, time points) within the outcome domain? | | | NI |  |
|  | 5.3 ... multiple eligible analyses of the data? |  |  | NI |  |
|  | **Risk of bias judgement** |  |  | **Low** | This study conducted a secondary analysis of the dependent variables based on individual original data. |
| **Overall bias** | **Risk of bias judgement** |  |  | **Low** |  |
|  |  |  |  |  |  |
|  |  |  |  |  |  |
| **Unique ID** | 3 | **Study ID** | 2 | **Assessor** | Bai |
| **Ref or Label** |  | **Aim** | assignment to intervention (the 'intention-to-treat' effect) | |  |
| **Experimental** | Media literacy | **Comparator** | Control | **Source** | Journal article(s) |
| **Outcome** | discrimination ability and discrimination criterion | **Results** |  | **Weight** | 1 |
| **Domain** | **Signalling question** |  |  | **Response** | **Comments** |
| **Bias arising from the randomization process** | 1.1 Was the allocation sequence random? |  |  | Y | respondents were randomly assigned to receive either an invitation to receive political fact-checks or placebo content about health and fitness |
|  | 1.2 Was the allocation sequence concealed until participants were enrolled and assigned to interventions? | | | Y |  |
|  | 1.3 Did baseline differences between intervention groups suggest a problem with the randomization process? | | | N | Balance tests suggest the randomization was successful |
|  | **Risk of bias judgement** |  |  | **Low** |  |
| **Bias due to deviations from intended interventions** | 2.1.Were participants aware of their assigned intervention during the trial? | |  | NI | respondents were randomly assigned to receive either an invitation to receive political fact-checks or placebo content about health and fitness.  The researchers had to know what group the subjects were in before they could intervene. |
|  | 2.2.Were carers and people delivering the interventions aware of participants' assigned intervention during the trial? | | | PY |  |
|  | 2.3. If Y/PY/NI to 2.1 or 2.2: Were there deviations from the intended intervention that arose because of the experimental context? | | | N | we find no evidence of differential attrition attributable to treatment status among wave |
|  | 2.4 If Y/PY to 2.3: Were these deviations likely to have affected the outcome? | |  | NA |  |
|  | 2.5. If Y/PY/NI to 2.4: Were these deviations from intended intervention balanced between groups? | | | NA |  |
|  | 2.6 Was an appropriate analysis used to estimate the effect of assignment to intervention? | | | Y | Respon-dents were excluded if indicated they mostly or always give humorous or insincere answers to survey questions (which amounted to 7–8% of responses in the online survey by wave compared to less than 1% in the face-to-face survey; |
|  | 2.7 If N/PN/NI to 2.6: Was there potential for a substantial impact (on the result) of the failure to analyse participants in the group to which they were randomized? | | | NA |  |
|  | **Risk of bias judgement** |  |  | **Low** |  |
| **Bias due to missing outcome data** | 3.1 Were data for this outcome available for all, or nearly all, participants randomized? | | | Y | we find no evidence of differential attrition attributable to treatment status among wave 2 participants |
|  | 3.2 If N/PN/NI to 3.1: Is there evidence that result was not biased by missing outcome data? | | | NA |  |
|  | 3.3 If N/PN to 3.2: Could missingness in the outcome depend on its true value? | |  | NA |  |
|  | 3.4 If Y/PY/NI to 3.3: Is it likely that missingness in the outcome depended on its true value? | | | NA |  |
|  | **Risk of bias judgement** |  |  | **Low** |  |
| **Bias in measurement of the outcome** | 4.1 Was the method of measuring the outcome inappropriate? | |  | N | All of the headlines were published by actual news sources or circulated on Facebook or WhatsApp within 6 mo of the respec-tive survey, and a portion of the headlines were rated as false by at least one third-party fact-checking organization. The order of the headlines was randomized within wave for each respondent. |
|  | 4.2 Could measurement or ascertainment of the outcome have differed between intervention groups? | | | N | All of the headlines were published by actual news sources or circulated on Facebook or WhatsApp within 6 mo of the respec-tive survey, and a portion of the headlines were rated as false by at least one third-party fact-checking organization. The order of the headlines was randomized within wave for each respondent. |
|  | 4.3 Were outcome assessors aware of the intervention received by study participants? | | | N | Collection is automatically collected through online survey sites. |
|  | 4.4 If Y/PY/NI to 4.3: Could assessment of the outcome have been influenced by knowledge of intervention received? | | | NA |  |
|  | 4.5 If Y/PY/NI to 4.4: Is it likely that assessment of the outcome was influenced by knowledge of intervention received? | | | NA |  |
|  | **Risk of bias judgement** |  |  | **Low** |  |
| **Bias in selection of the reported result** | 5.1 Were the data that produced this result analysed in accordance with a pre-specified analysis plan that was finalized before unblinded outcome data were available for analysis? | | | NI |  |
|  | 5.2 ... multiple eligible outcome measurements (e.g. scales, definitions, time points) within the outcome domain? | | | NI |  |
|  | 5.3 ... multiple eligible analyses of the data? |  |  | NI |  |
|  | **Risk of bias judgement** |  |  | **Low** | This study conducted a secondary analysis of the dependent variables based on individual original data. |
| **Overall bias** | **Risk of bias judgement** |  |  | **Low** |  |
|  |  |  |  |  |  |
|  |  |  |  |  |  |
| **Unique ID** | 4 | **Study ID** | 2 | **Assessor** | Bai |
| **Ref or Label** |  | **Aim** | assignment to intervention (the 'intention-to-treat' effect) | |  |
| **Experimental** | Media literacy | **Comparator** | Control | **Source** | Journal article(s) |
| **Outcome** | discrimination ability and discrimination criterion | **Results** |  | **Weight** | 1 |
| **Domain** | **Signalling question** |  |  | **Response** | **Comments** |
| **Bias arising from the randomization process** | 1.1 Was the allocation sequence random? |  |  | Y | We will then randomly select evens or odds.Each respondent was randomly assigned to either the placebo or treatment condition for the medialiteracy intervention experiment (randomization occurs at the individual level in both the face-to-face and the online survey) |
|  | 1.2 Was the allocation sequence concealed until participants were enrolled and assigned to interventions? | | | PY |  |
|  | 1.3 Did baseline differences between intervention groups suggest a problem with the randomization process? | | | N | The survey instrument and all treatments were provided in Hindi. Balance tests suggest the randomization was successful |
|  | **Risk of bias judgement** |  |  | **Low** |  |
| **Bias due to deviations from intended interventions** | 2.1.Were participants aware of their assigned intervention during the trial? | |  | NI | The researchers had to know what group the subjects were in before they could intervene. |
|  | 2.2.Were carers and people delivering the interventions aware of participants' assigned intervention during the trial? | | | Y |  |
|  | 2.3. If Y/PY/NI to 2.1 or 2.2: Were there deviations from the intended intervention that arose because of the experimental context? | | | N | we find no evidence of differential attrition attributable to treatment status among wave |
|  | 2.4 If Y/PY to 2.3: Were these deviations likely to have affected the outcome? | |  | NA |  |
|  | 2.5. If Y/PY/NI to 2.4: Were these deviations from intended intervention balanced between groups? | | | NA |  |
|  | 2.6 Was an appropriate analysis used to estimate the effect of assignment to intervention? | | | Y | researchers will remove participants who have failed manipulative tests during analysis. |
|  | 2.7 If N/PN/NI to 2.6: Was there potential for a substantial impact (on the result) of the failure to analyse participants in the group to which they were randomized? | | | NA |  |
|  | **Risk of bias judgement** |  |  | **Low** |  |
| **Bias due to missing outcome data** | 3.1 Were data for this outcome available for all, or nearly all, participants randomized? | | | Y | four parliamentary constituencies in the state of Uttar Pradesh where Hindi is the dominant language (wave 1, April 13 to May 2, 2019, N = 3, 744; wave 2, May 7 to 19, 2019, N = 2,695). |
|  | 3.2 If N/PN/NI to 3.1: Is there evidence that result was not biased by missing outcome data? | | | NA |  |
|  | 3.3 If N/PN to 3.2: Could missingness in the outcome depend on its true value? | |  | NA |  |
|  | 3.4 If Y/PY/NI to 3.3: Is it likely that missingness in the outcome depended on its true value? | | | NA |  |
|  | **Risk of bias judgement** |  |  | **Low** |  |
| **Bias in measurement of the outcome** | 4.1 Was the method of measuring the outcome inappropriate? | |  | N | All of the headlines were published by actual news sources or circulated on Facebook or WhatsApp within 7 mo of the respec-tive survey, and a portion of the headlines were rated as false by at least one third-party fact-checking organization. The order of the headlines was randomized within wave for each respondent. |
|  | 4.2 Could measurement or ascertainment of the outcome have differed between intervention groups? | | | N | All of the headlines were published by actual news sources or circulated on Facebook or WhatsApp within 7 mo of the respec-tive survey, and a portion of the headlines were rated as false by at least one third-party fact-checking organization. The order of the headlines was randomized within wave for each respondent. |
|  | 4.3 Were outcome assessors aware of the intervention received by study participants? | | | PY | Post-test after intervention, subject may know. |
|  | 4.4 If Y/PY/NI to 4.3: Could assessment of the outcome have been influenced by knowledge of intervention received? | | | N | It is self-reported by the subject, not the subject |
|  | 4.5 If Y/PY/NI to 4.4: Is it likely that assessment of the outcome was influenced by knowledge of intervention received? | | | NA |  |
|  | **Risk of bias judgement** |  |  | **Low** |  |
| **Bias in selection of the reported result** | 5.1 Were the data that produced this result analysed in accordance with a pre-specified analysis plan that was finalized before unblinded outcome data were available for analysis? | | | NI |  |
|  | 5.2 ... multiple eligible outcome measurements (e.g. scales, definitions, time points) within the outcome domain? | | | NI |  |
|  | 5.3 ... multiple eligible analyses of the data? |  |  | NI |  |
|  | **Risk of bias judgement** |  |  | **Low** | This study conducted a secondary analysis of the dependent variables based on individual original data. |
| **Overall bias** | **Risk of bias judgement** |  |  | **Low** |  |
|  |  |  |  |  |  |
|  |  |  |  |  |  |
| **Unique ID** | 5 | **Study ID** | 3 | **Assessor** | Bai |
| **Ref or Label** |  | **Aim** | assignment to intervention (the 'intention-to-treat' effect) | |  |
| **Experimental** | Inoculation strategies | **Comparator** | Control | **Source** | Journal article(s) |
| **Outcome** | discrimination ability and discrimination criterion | **Results** |  | **Weight** | 1 |
| **Domain** | **Signalling question** |  |  | **Response** | **Comments** |
| **Bias arising from the randomization process** | 1.1 Was the allocation sequence random? |  |  | Y | Experiment 2 investigated the testing effect using three different in-game surveys (inline with Solocmon’s Three Group Design). |
|  | 1.2 Was the allocation sequence concealed until participants were enrolled and assigned to interventions? | | | NI |  |
|  | 1.3 Did baseline differences between intervention groups suggest a problem with the randomization process? | | | PN | There was no significant difference between 2.83 and 2.73. |
|  | **Risk of bias judgement** |  |  | **Some concerns** |  |
| **Bias due to deviations from intended interventions** | 2.1.Were participants aware of their assigned intervention during the trial? | |  | PN | Experiment 2 investigated the testing effect using three different in-game surveys (inline with Solomon’s Three Group Design).  The researchers had to know what group the subjects were in before they could intervene. |
|  | 2.2.Were carers and people delivering the interventions aware of participants' assigned intervention during the trial? | | | PY |  |
|  | 2.3. If Y/PY/NI to 2.1 or 2.2: Were there deviations from the intended intervention that arose because of the experimental context? | | | NI |  |
|  | 2.4 If Y/PY to 2.3: Were these deviations likely to have affected the outcome? | |  | NA |  |
|  | 2.5. If Y/PY/NI to 2.4: Were these deviations from intended intervention balanced between groups? | | | NA |  |
|  | 2.6 Was an appropriate analysis used to estimate the effect of assignment to intervention? | | | PY | researchers will remove participants who have failed manipulative tests during analysis. |
|  | 2.7 If N/PN/NI to 2.6: Was there potential for a substantial impact (on the result) of the failure to analyse participants in the group to which they were randomized? | | | NA |  |
|  | **Risk of bias judgement** |  |  | **Some concerns** |  |
| **Bias due to missing outcome data** | 3.1 Were data for this outcome available for all, or nearly all, participants randomized? | | | PY | After removing duplicate cases and filtering on complete cases only, 2,182 unique participants remained who completed the full experiment (480 for Experiment 1 and 1,679 for Experiment 2). |
|  | 3.2 If N/PN/NI to 3.1: Is there evidence that result was not biased by missing outcome data? | | | NA |  |
|  | 3.3 If N/PN to 3.2: Could missingness in the outcome depend on its true value? | |  | NA |  |
|  | 3.4 If Y/PY/NI to 3.3: Is it likely that missingness in the outcome depended on its true value? | | | NA |  |
|  | **Risk of bias judgement** |  |  | **Low** |  |
| **Bias in measurement of the outcome** | 4.1 Was the method of measuring the outcome inappropriate? | |  | NI |  |
|  | 4.2 Could measurement or ascertainment of the outcome have differed between intervention groups? | | | N | Figure 3. Flowchart with hypotheses for the Testing Effects experiment. |
|  | 4.3 Were outcome assessors aware of the intervention received by study participants? | | | PY | Post-test after intervention, subject may know. |
|  | 4.4 If Y/PY/NI to 4.3: Could assessment of the outcome have been influenced by knowledge of intervention received? | | | N | It is self-reported by the subject, not the subject. |
|  | 4.5 If Y/PY/NI to 4.4: Is it likely that assessment of the outcome was influenced by knowledge of intervention received? | | | NA |  |
|  | **Risk of bias judgement** |  |  | **Low** |  |
| **Bias in selection of the reported result** | 5.1 Were the data that produced this result analysed in accordance with a pre-specified analysis plan that was finalized before unblinded outcome data were available for analysis? | | | NI |  |
|  | 5.2 ... multiple eligible outcome measurements (e.g. scales, definitions, time points) within the outcome domain? | | | NI |  |
|  | 5.3 ... multiple eligible analyses of the data? |  |  | NI |  |
|  | **Risk of bias judgement** |  |  | **Low** | This study conducted a secondary analysis of the dependent variables based on individual original data. |
| **Overall bias** | **Risk of bias judgement** |  |  | **Some concerns** |  |
|  |  |  |  |  |  |
|  |  |  |  |  |  |
| **Unique ID** | 6 | **Study ID** | 4 | **Assessor** | Bai |
| **Ref or Label** |  | **Aim** | assignment to intervention (the 'intention-to-treat' effect) | |  |
| **Experimental** | Media literacy | **Comparator** | Control | **Source** | Journal article(s); Statistical analysis plan (SAP) |
| **Outcome** | discrimination ability and discrimination criterion | **Results** |  | **Weight** | 1 |
| **Domain** | **Signalling question** |  |  | **Response** | **Comments** |
| **Bias arising from the randomization process** | 1.1 Was the allocation sequence random? |  |  | Y | Participants were then randomly assigned between-subjects to either play the video game Snake (the control condition), available via Google (https://www.google.com/fbx?fbx= snake_arcade), or to take the Spot the Troll Quiz (https://spotthetroll. org/), hosted on a separate website tab. |
|  | 1.2 Was the allocation sequence concealed until participants were enrolled and assigned to interventions? | | | PY |  |
|  | 1.3 Did baseline differences between intervention groups suggest a problem with the randomization process? | | | PN | All analyses below are also robust to controlling for education, ethnicity, age, and gender (which was not preregistered, see on-line supplementary material for results with demographic con-trols). |
|  | **Risk of bias judgement** |  |  | **Low** |  |
| **Bias due to deviations from intended interventions** | 2.1.Were participants aware of their assigned intervention during the trial? | |  | PN | Participants were informed they needed to spend a minimum of 7 min playing their respective game, at which point the arrow to progress would appear (a 7-min timer was visible to participants in the survey), and were asked to re-port the score they received in the game.  Online linking experiment. |
|  | 2.2.Were carers and people delivering the interventions aware of participants' assigned intervention during the trial? | | | PN |  |
|  | 2.3. If Y/PY/NI to 2.1 or 2.2: Were there deviations from the intended intervention that arose because of the experimental context? | | | NA |  |
|  | 2.4 If Y/PY to 2.3: Were these deviations likely to have affected the outcome? | |  | NA |  |
|  | 2.5. If Y/PY/NI to 2.4: Were these deviations from intended intervention balanced between groups? | | | NA |  |
|  | 2.6 Was an appropriate analysis used to estimate the effect of assignment to intervention? | | | Y | researchers will remove participants who have failed manipulative tests during analysis. |
|  | 2.7 If N/PN/NI to 2.6: Was there potential for a substantial impact (on the result) of the failure to analyse participants in the group to which they were randomized? | | | NA |  |
|  | **Risk of bias judgement** |  |  | **Low** |  |
| **Bias due to missing outcome data** | 3.1 Were data for this outcome available for all, or nearly all, participants randomized? | | | Y |  |
|  | 3.2 If N/PN/NI to 3.1: Is there evidence that result was not biased by missing outcome data? | | | NA |  |
|  | 3.3 If N/PN to 3.2: Could missingness in the outcome depend on its true value? | |  | NA |  |
|  | 3.4 If Y/PY/NI to 3.3: Is it likely that missingness in the outcome depended on its true value? | | | NA |  |
|  | **Risk of bias judgement** |  |  | **Low** |  |
| **Bias in measurement of the outcome** | 4.1 Was the method of measuring the outcome inappropriate? | |  | NI |  |
|  | 4.2 Could measurement or ascertainment of the outcome have differed between intervention groups? | | | N | Participants then responded to the six-item affective polarization measure, where they rated on 0–100 thermometer scales their feelings toward Democratic/ Republican voters, The Democratic/Republican party, and Trump/Biden voters. Participants then received instruction on, then rated their perceived reliability of the information in, four fake news headlines and two true news headlines drawn from Maertens et al. (19) on 1–7 Likert scales (“Very Unreliable” to “Very Reliable”). |
|  | 4.3 Were outcome assessors aware of the intervention received by study participants? | | | N | online experment |
|  | 4.4 If Y/PY/NI to 4.3: Could assessment of the outcome have been influenced by knowledge of intervention received? | | | NA |  |
|  | 4.5 If Y/PY/NI to 4.4: Is it likely that assessment of the outcome was influenced by knowledge of intervention received? | | | NA |  |
|  | **Risk of bias judgement** |  |  | **Low** |  |
| **Bias in selection of the reported result** | 5.1 Were the data that produced this result analysed in accordance with a pre-specified analysis plan that was finalized before unblinded outcome data were available for analysis? | | | NI |  |
|  | 5.2 ... multiple eligible outcome measurements (e.g. scales, definitions, time points) within the outcome domain? | | | NI |  |
|  | 5.3 ... multiple eligible analyses of the data? |  |  | NI |  |
|  | **Risk of bias judgement** |  |  | **Low** | This study conducted a secondary analysis of the dependent variables based on individual original data. |
| **Overall bias** | **Risk of bias judgement** |  |  | **Low** |  |
|  |  |  |  |  |  |
|  |  |  |  |  |  |
| **Unique ID** | 7 | **Study ID** | 5 | **Assessor** | Bai |
| **Ref or Label** |  | **Aim** | assignment to intervention (the 'intention-to-treat' effect) | |  |
| **Experimental** | Financial incentives | **Comparator** | Control | **Source** | Journal article(s) |
| **Outcome** | discrimination ability and discrimination criterion | **Results** |  | **Weight** | 1 |
| **Domain** | **Signalling question** |  |  | **Response** | **Comments** |
| **Bias arising from the randomization process** | 1.1 Was the allocation sequence random? |  |  | Y | Half of the participants were randomly assigned to a control condition, in which we explained the news evaluation task, but we did not provide any information about a bonus payment. |
|  | 1.2 Was the allocation sequence concealed until participants were enrolled and assigned to interventions? | | | PY |  |
|  | 1.3 Did baseline differences between intervention groups suggest a problem with the randomization process? | | | NI |  |
|  | **Risk of bias judgement** |  |  | **Low** |  |
| **Bias due to deviations from intended interventions** | 2.1.Were participants aware of their assigned intervention during the trial? | |  | NI | The researchers had to know what group the subjects were in before they could intervene. |
|  | 2.2.Were carers and people delivering the interventions aware of participants' assigned intervention during the trial? | | | PY |  |
|  | 2.3. If Y/PY/NI to 2.1 or 2.2: Were there deviations from the intended intervention that arose because of the experimental context? | | | NI |  |
|  | 2.4 If Y/PY to 2.3: Were these deviations likely to have affected the outcome? | |  | NA |  |
|  | 2.5. If Y/PY/NI to 2.4: Were these deviations from intended intervention balanced between groups? | | | NA |  |
|  | 2.6 Was an appropriate analysis used to estimate the effect of assignment to intervention? | | | Y | researchers will remove participants who have failed manipulative tests during analysis. |
|  | 2.7 If N/PN/NI to 2.6: Was there potential for a substantial impact (on the result) of the failure to analyse participants in the group to which they were randomized? | | | NA |  |
|  | **Risk of bias judgement** |  |  | **Some concerns** |  |
| **Bias due to missing outcome data** | 3.1 Were data for this outcome available for all, or nearly all, participants randomized? | | | Y | Following our pre-registered exclusion criteria, we excluded 32 participants who failed our attention check (or did not get far enough in the experiment to reach our attention check), and an additional 17 participants who said they responded randomly at  some time during the experiment. |
|  | 3.2 If N/PN/NI to 3.1: Is there evidence that result was not biased by missing outcome data? | | | NA |  |
|  | 3.3 If N/PN to 3.2: Could missingness in the outcome depend on its true value? | |  | NA |  |
|  | 3.4 If Y/PY/NI to 3.3: Is it likely that missingness in the outcome depended on its true value? | | | NA |  |
|  | **Risk of bias judgement** |  |  | **Low** |  |
| **Bias in measurement of the outcome** | 4.1 Was the method of measuring the outcome inappropriate? | |  | N | The materials were 16 pre-tested true and false news head-lines from a large pre-tested sample of 225 news headlines |
|  | 4.2 Could measurement or ascertainment of the outcome have differed between intervention groups? | | | N | The other half of participants were assigned to a ‘control’ condition in which they were asked the same questions about accuracy and sharing without any incentive to be accurate. |
|  | 4.3 Were outcome assessors aware of the intervention received by study participants? | | | PY | Post-test after intervention, subject may know. |
|  | 4.4 If Y/PY/NI to 4.3: Could assessment of the outcome have been influenced by knowledge of intervention received? | | | PN | It is self-reported by the subject, not the subject. |
|  | 4.5 If Y/PY/NI to 4.4: Is it likely that assessment of the outcome was influenced by knowledge of intervention received? | | | NA |  |
|  | **Risk of bias judgement** |  |  | **Low** |  |
| **Bias in selection of the reported result** | 5.1 Were the data that produced this result analysed in accordance with a pre-specified analysis plan that was finalized before unblinded outcome data were available for analysis? | | | NI |  |
|  | 5.2 ... multiple eligible outcome measurements (e.g. scales, definitions, time points) within the outcome domain? | | | NI |  |
|  | 5.3 ... multiple eligible analyses of the data? |  |  | NI |  |
|  | **Risk of bias judgement** |  |  | **Low** | This study conducted a secondary analysis of the dependent variables based on individual original data. |
| **Overall bias** | **Risk of bias judgement** |  |  | **Some concerns** |  |
|  |  |  |  |  |  |
|  |  |  |  |  |  |
| **Unique ID** | 8 | **Study ID** | 5 | **Assessor** | Bai |
| **Ref or Label** |  | **Aim** | assignment to intervention (the 'intention-to-treat' effect) | |  |
| **Experimental** | Financial incentives | **Comparator** | Control | **Source** | Journal article(s) |
| **Outcome** | discrimination ability and discrimination criterion | **Results** |  | **Weight** | 1 |
| **Domain** | **Signalling question** |  |  | **Response** | **Comments** |
| **Bias arising from the randomization process** | 1.1 Was the allocation sequence random? |  |  | Y | Half of the participants were randomly assigned to a control condition, in which we explained the news evaluation task, but we did not provide any information about a bonus payment. |
|  | 1.2 Was the allocation sequence concealed until participants were enrolled and assigned to interventions? | | | PY |  |
|  | 1.3 Did baseline differences between intervention groups suggest a problem with the randomization process? | | | NI |  |
|  | **Risk of bias judgement** |  |  | **Low** |  |
| **Bias due to deviations from intended interventions** | 2.1.Were participants aware of their assigned intervention during the trial? | |  | NI | The researchers had to know what group the subjects were in before they could intervene. |
|  | 2.2.Were carers and people delivering the interventions aware of participants' assigned intervention during the trial? | | | PY |  |
|  | 2.3. If Y/PY/NI to 2.1 or 2.2: Were there deviations from the intended intervention that arose because of the experimental context? | | | NI |  |
|  | 2.4 If Y/PY to 2.3: Were these deviations likely to have affected the outcome? | |  | NA |  |
|  | 2.5. If Y/PY/NI to 2.4: Were these deviations from intended intervention balanced between groups? | | | NA |  |
|  | 2.6 Was an appropriate analysis used to estimate the effect of assignment to intervention? | | | Y | researchers will remove participants who have failed manipulative tests during analysis. |
|  | 2.7 If N/PN/NI to 2.6: Was there potential for a substantial impact (on the result) of the failure to analyse participants in the group to which they were randomized? | | | NA |  |
|  | **Risk of bias judgement** |  |  | **Some concerns** |  |
| **Bias due to missing outcome data** | 3.1 Were data for this outcome available for all, or nearly all, participants randomized? | | | Y | Following our pre-registered exclusion criteria, we excluded 76 participants who failed our attention check (or did not finish enough of the survey to reach the attention check) and an additional 39 participants who said they responded randomly at some point during the experiment. |
|  | 3.2 If N/PN/NI to 3.1: Is there evidence that result was not biased by missing outcome data? | | | NA |  |
|  | 3.3 If N/PN to 3.2: Could missingness in the outcome depend on its true value? | |  | NA |  |
|  | 3.4 If Y/PY/NI to 3.3: Is it likely that missingness in the outcome depended on its true value? | | | NA |  |
|  | **Risk of bias judgement** |  |  | **Low** |  |
| **Bias in measurement of the outcome** | 4.1 Was the method of measuring the outcome inappropriate? | |  | N | The materials were 16 pre-tested true and false news head-lines from a large pre-tested sample of 225 news headlines |
|  | 4.2 Could measurement or ascertainment of the outcome have differed between intervention groups? | | | N | The other half of participants were assigned to a ‘control’ condition in which they were asked the same questions about accuracy and sharing without any incentive to be accurate. |
|  | 4.3 Were outcome assessors aware of the intervention received by study participants? | | | PY | Post-test after intervention, subject may know. |
|  | 4.4 If Y/PY/NI to 4.3: Could assessment of the outcome have been influenced by knowledge of intervention received? | | | PN | It is self-reported by the subject, not the subject. |
|  | 4.5 If Y/PY/NI to 4.4: Is it likely that assessment of the outcome was influenced by knowledge of intervention received? | | | NA |  |
|  | **Risk of bias judgement** |  |  | **Low** |  |
| **Bias in selection of the reported result** | 5.1 Were the data that produced this result analysed in accordance with a pre-specified analysis plan that was finalized before unblinded outcome data were available for analysis? | | | NI |  |
|  | 5.2 ... multiple eligible outcome measurements (e.g. scales, definitions, time points) within the outcome domain? | | | NI |  |
|  | 5.3 ... multiple eligible analyses of the data? |  |  | NI |  |
|  | **Risk of bias judgement** |  |  | **Low** | This study conducted a secondary analysis of the dependent variables based on individual original data. |
| **Overall bias** | **Risk of bias judgement** |  |  | **Some concerns** |  |
|  |  |  |  |  |  |
|  |  |  |  |  |  |
| **Unique ID** | 9 | **Study ID** | 5 | **Assessor** | Bai |
| **Ref or Label** |  | **Aim** | assignment to intervention (the 'intention-to-treat' effect) | |  |
| **Experimental** | Financial incentives | **Comparator** | Control | **Source** | Journal article(s) |
| **Outcome** | discrimination ability and discrimination criterion | **Results** |  | **Weight** | 1 |
| **Domain** | **Signalling question** |  |  | **Response** | **Comments** |
| **Bias arising from the randomization process** | 1.1 Was the allocation sequence random? |  |  | Y | Half of the participants were randomly assigned to a control condition, in which we explained the news evaluation task, but we did not provide any information about a bonus payment. |
|  | 1.2 Was the allocation sequence concealed until participants were enrolled and assigned to interventions? | | | PY |  |
|  | 1.3 Did baseline differences between intervention groups suggest a problem with the randomization process? | | | NI |  |
|  | **Risk of bias judgement** |  |  | **Low** |  |
| **Bias due to deviations from intended interventions** | 2.1.Were participants aware of their assigned intervention during the trial? | |  | NI | The researchers had to know what group the subjects were in before they could intervene. |
|  | 2.2.Were carers and people delivering the interventions aware of participants' assigned intervention during the trial? | | | PY |  |
|  | 2.3. If Y/PY/NI to 2.1 or 2.2: Were there deviations from the intended intervention that arose because of the experimental context? | | | NI |  |
|  | 2.4 If Y/PY to 2.3: Were these deviations likely to have affected the outcome? | |  | NA |  |
|  | 2.5. If Y/PY/NI to 2.4: Were these deviations from intended intervention balanced between groups? | | | NA |  |
|  | 2.6 Was an appropriate analysis used to estimate the effect of assignment to intervention? | | | Y | researchers will remove participants who have failed manipulative tests during analysis. |
|  | 2.7 If N/PN/NI to 2.6: Was there potential for a substantial impact (on the result) of the failure to analyse participants in the group to which they were randomized? | | | NA |  |
|  | **Risk of bias judgement** |  |  | **Some concerns** |  |
| **Bias due to missing outcome data** | 3.1 Were data for this outcome available for all, or nearly all, participants randomized? | | | Y | we once again excluded 95 participants who failed our attention check (or did not make it to that point in the survey), as well as 39 participants who said they were responding randomly at some point in the survey. |
|  | 3.2 If N/PN/NI to 3.1: Is there evidence that result was not biased by missing outcome data? | | | NA |  |
|  | 3.3 If N/PN to 3.2: Could missingness in the outcome depend on its true value? | |  | NA |  |
|  | 3.4 If Y/PY/NI to 3.3: Is it likely that missingness in the outcome depended on its true value? | | | NA |  |
|  | **Risk of bias judgement** |  |  | **Low** |  |
| **Bias in measurement of the outcome** | 4.1 Was the method of measuring the outcome inappropriate? | |  | N | The materials were 16 pre-tested true and false news head-lines from a large pre-tested sample of 225 news headlines |
|  | 4.2 Could measurement or ascertainment of the outcome have differed between intervention groups? | | | N | The other half of participants were assigned to a ‘control’ condition in which they were asked the same questions about accuracy and sharing without any incentive to be accurate. |
|  | 4.3 Were outcome assessors aware of the intervention received by study participants? | | | PY | Post-test after intervention, subject may know. |
|  | 4.4 If Y/PY/NI to 4.3: Could assessment of the outcome have been influenced by knowledge of intervention received? | | | PN | It is self-reported by the subject, not the subject. |
|  | 4.5 If Y/PY/NI to 4.4: Is it likely that assessment of the outcome was influenced by knowledge of intervention received? | | | NA |  |
|  | **Risk of bias judgement** |  |  | **Low** |  |
| **Bias in selection of the reported result** | 5.1 Were the data that produced this result analysed in accordance with a pre-specified analysis plan that was finalized before unblinded outcome data were available for analysis? | | | NI |  |
|  | 5.2 ... multiple eligible outcome measurements (e.g. scales, definitions, time points) within the outcome domain? | | | NI |  |
|  | 5.3 ... multiple eligible analyses of the data? |  |  | NI |  |
|  | **Risk of bias judgement** |  |  | **Low** | This study conducted a secondary analysis of the dependent variables based on individual original data. |
| **Overall bias** | **Risk of bias judgement** |  |  | **Some concerns** |  |
|  |  |  |  |  |  |
|  |  |  |  |  |  |
| **Unique ID** | 10 | **Study ID** | 5 | **Assessor** | Bai |
| **Ref or Label** |  | **Aim** | assignment to intervention (the 'intention-to-treat' effect) | |  |
| **Experimental** | Financial incentives.Accuracy prompts | **Comparator** | Control | **Source** | Journal article(s) |
| **Outcome** | discrimination ability and discrimination criterion | **Results** |  | **Weight** | 1 |
| **Domain** | **Signalling question** |  |  | **Response** | **Comments** |
| **Bias arising from the randomization process** | 1.1 Was the allocation sequence random? |  |  | Y | Half of the participants were randomly assigned to a control condition, in which we explained the news evaluation task, but we did not provide any information about a bonus payment. |
|  | 1.2 Was the allocation sequence concealed until participants were enrolled and assigned to interventions? | | | PY |  |
|  | 1.3 Did baseline differences between intervention groups suggest a problem with the randomization process? | | | NI |  |
|  | **Risk of bias judgement** |  |  | **Low** |  |
| **Bias due to deviations from intended interventions** | 2.1.Were participants aware of their assigned intervention during the trial? | |  | NI | The researchers had to know what group the subjects were in before they could intervene. |
|  | 2.2.Were carers and people delivering the interventions aware of participants' assigned intervention during the trial? | | | PY |  |
|  | 2.3. If Y/PY/NI to 2.1 or 2.2: Were there deviations from the intended intervention that arose because of the experimental context? | | | NI |  |
|  | 2.4 If Y/PY to 2.3: Were these deviations likely to have affected the outcome? | |  | NA |  |
|  | 2.5. If Y/PY/NI to 2.4: Were these deviations from intended intervention balanced between groups? | | | NA |  |
|  | 2.6 Was an appropriate analysis used to estimate the effect of assignment to intervention? | | | Y | researchers will remove participants who have failed manipulative tests during analysis. |
|  | 2.7 If N/PN/NI to 2.6: Was there potential for a substantial impact (on the result) of the failure to analyse participants in the group to which they were randomized? | | | NA |  |
|  | **Risk of bias judgement** |  |  | **Some concerns** |  |
| **Bias due to missing outcome data** | 3.1 Were data for this outcome available for all, or nearly all, participants randomized? | | | Y | we excluded 17 participants who failed our attention check (or did not finish enough of the survey to reach the attention check) and an additional 8 participants who said they responded randomly at some point during the experiment. |
|  | 3.2 If N/PN/NI to 3.1: Is there evidence that result was not biased by missing outcome data? | | | NA |  |
|  | 3.3 If N/PN to 3.2: Could missingness in the outcome depend on its true value? | |  | NA |  |
|  | 3.4 If Y/PY/NI to 3.3: Is it likely that missingness in the outcome depended on its true value? | | | NA |  |
|  | **Risk of bias judgement** |  |  | **Low** |  |
| **Bias in measurement of the outcome** | 4.1 Was the method of measuring the outcome inappropriate? | |  | N | The materials were 16 pre-tested true and false news head-lines from a large pre-tested sample of 225 news headlines |
|  | 4.2 Could measurement or ascertainment of the outcome have differed between intervention groups? | | | N | The other half of participants were assigned to a ‘control’ condition in which they were asked the same questions about accuracy and sharing without any incentive to be accurate. |
|  | 4.3 Were outcome assessors aware of the intervention received by study participants? | | | PY | Post-test after intervention, subject may know. |
|  | 4.4 If Y/PY/NI to 4.3: Could assessment of the outcome have been influenced by knowledge of intervention received? | | | PN | It is self-reported by the subject, not the subject. |
|  | 4.5 If Y/PY/NI to 4.4: Is it likely that assessment of the outcome was influenced by knowledge of intervention received? | | | NA |  |
|  | **Risk of bias judgement** |  |  | **Low** |  |
| **Bias in selection of the reported result** | 5.1 Were the data that produced this result analysed in accordance with a pre-specified analysis plan that was finalized before unblinded outcome data were available for analysis? | | | NI |  |
|  | 5.2 ... multiple eligible outcome measurements (e.g. scales, definitions, time points) within the outcome domain? | | | NI |  |
|  | 5.3 ... multiple eligible analyses of the data? |  |  | NI |  |
|  | **Risk of bias judgement** |  |  | **Low** | This study conducted a secondary analysis of the dependent variables based on individual original data. |
| **Overall bias** | **Risk of bias judgement** |  |  | **Some concerns** |  |
|  |  |  |  |  |  |
|  |  |  |  |  |  |
| **Unique ID** | 11 | **Study ID** | 6 | **Assessor** | Bai |
| **Ref or Label** |  | **Aim** | assignment to intervention (the 'intention-to-treat' effect) | |  |
| **Experimental** | Accuracy prompts | **Comparator** | Control | **Source** | Journal article(s) |
| **Outcome** | discrimination ability and discrimination criterion | **Results** |  | **Weight** | 1 |
| **Domain** | **Signalling question** |  |  | **Response** | **Comments** |
| **Bias arising from the randomization process** | 1.1 Was the allocation sequence random? |  |  | Y | The participants were randomly assigned to one of eight different between-participants conditions.The participants and experimenters were blind to the name and aim of the condition that the participants were randomized into (double blind). |
|  | 1.2 Was the allocation sequence concealed until participants were enrolled and assigned to interventions? | | | Y |  |
|  | 1.3 Did baseline differences between intervention groups suggest a problem with the randomization process? | | | NI |  |
|  | **Risk of bias judgement** |  |  | **Low** |  |
| **Bias due to deviations from intended interventions** | 2.1.Were participants aware of their assigned intervention during the trial? | |  | N | The participants and experimenters were blind to the name and aim of the condition that the participants were randomized into (double blind). |
|  | 2.2.Were carers and people delivering the interventions aware of participants' assigned intervention during the trial? | | | N |  |
|  | 2.3. If Y/PY/NI to 2.1 or 2.2: Were there deviations from the intended intervention that arose because of the experimental context? | | | NA |  |
|  | 2.4 If Y/PY to 2.3: Were these deviations likely to have affected the outcome? | |  | NA |  |
|  | 2.5. If Y/PY/NI to 2.4: Were these deviations from intended intervention balanced between groups? | | | NA |  |
|  | 2.6 Was an appropriate analysis used to estimate the effect of assignment to intervention? | | | Y | Researchers will remove participants who have failed manipulative tests during analysis. |
|  | 2.7 If N/PN/NI to 2.6: Was there potential for a substantial impact (on the result) of the failure to analyse participants in the group to which they were randomized? | | | NA |  |
|  | **Risk of bias judgement** |  |  | **Low** |  |
| **Bias due to missing outcome data** | 3.1 Were data for this outcome available for all, or nearly all, participants randomized? | | | Y | Data inclusion. Participants were removed from the survey and replaced with new respondents when they (1) did not consent to the study (N = 118), (2) did not finish the study (N = 1,037) or (3) failed the two-strikes-out attention check (N = 16). All incomplete responses and complete responses where participants no longer consented to the study at the end of the survey were removed; all other responses were included in the data analyses.  The sample comprised par-ticipants from 12 countries, N = 568 participants per country, for a total of N = 6,816 (mean age, 39.15 ± 14.17; N = 3,555 female) partici-pants. |
|  | 3.2 If N/PN/NI to 3.1: Is there evidence that result was not biased by missing outcome data? | | | NA |  |
|  | 3.3 If N/PN to 3.2: Could missingness in the outcome depend on its true value? | |  | NA |  |
|  | 3.4 If Y/PY/NI to 3.3: Is it likely that missingness in the outcome depended on its true value? | | | NA |  |
|  | **Risk of bias judgement** |  |  | **Low** |  |
| **Bias in measurement of the outcome** | 4.1 Was the method of measuring the outcome inappropriate? | |  | N | The statements were then fact-checked and condensed into a longlist out of which 10 true and 10 false statements were selected to be included in the truth discernment task. |
|  | 4.2 Could measurement or ascertainment of the outcome have differed between intervention groups? | | | N |  |
|  | 4.3 Were outcome assessors aware of the intervention received by study participants? | | | N | The participants and experimenters were blind to the name and aim of the condition that the participants were randomized into (double blind). |
|  | 4.4 If Y/PY/NI to 4.3: Could assessment of the outcome have been influenced by knowledge of intervention received? | | | NA |  |
|  | 4.5 If Y/PY/NI to 4.4: Is it likely that assessment of the outcome was influenced by knowledge of intervention received? | | | NA |  |
|  | **Risk of bias judgement** |  |  | **Low** |  |
| **Bias in selection of the reported result** | 5.1 Were the data that produced this result analysed in accordance with a pre-specified analysis plan that was finalized before unblinded outcome data were available for analysis? | | | NI |  |
|  | 5.2 ... multiple eligible outcome measurements (e.g. scales, definitions, time points) within the outcome domain? | | | NI |  |
|  | 5.3 ... multiple eligible analyses of the data? |  |  | NI |  |
|  | **Risk of bias judgement** |  |  | **Low** | This study conducted a secondary analysis of the dependent variables based on individual original data. |
| **Overall bias** | **Risk of bias judgement** |  |  | **Low** |  |
|  |  |  |  |  |  |
|  |  |  |  |  |  |
| **Unique ID** | 12 | **Study ID** | 7 | **Assessor** | Bai |
| **Ref or Label** |  | **Aim** | assignment to intervention (the 'intention-to-treat' effect) | |  |
| **Experimental** | Inoculation strategies | **Comparator** | Control | **Source** | Journal article(s) |
| **Outcome** | discrimination ability and discrimination criterion | **Results** |  | **Weight** | 1 |
| **Domain** | **Signalling question** |  |  | **Response** | **Comments** |
| **Bias arising from the randomization process** | 1.1 Was the allocation sequence random? |  |  | Y | Participants were randomly assigned to either the Inoculation condition (BNG) or the Control condition (Tetris). |
|  | 1.2 Was the allocation sequence concealed until participants were enrolled and assigned to interventions? | | | PY |  |
|  | 1.3 Did baseline differences between intervention groups suggest a problem with the randomization process? | | | NI |  |
|  | **Risk of bias judgement** |  |  | **Low** |  |
| **Bias due to deviations from intended interventions** | 2.1.Were participants aware of their assigned intervention during the trial? | |  | PN | Participants were randomly assigned to either the Inoculation condition (BNG) or the Control condition (Tetris).  The researchers had to know what group the subjects were in before they could intervene. |
|  | 2.2.Were carers and people delivering the interventions aware of participants' assigned intervention during the trial? | | | PY |  |
|  | 2.3. If Y/PY/NI to 2.1 or 2.2: Were there deviations from the intended intervention that arose because of the experimental context? | | | NI |  |
|  | 2.4 If Y/PY to 2.3: Were these deviations likely to have affected the outcome? | |  | NA |  |
|  | 2.5. If Y/PY/NI to 2.4: Were these deviations from intended intervention balanced between groups? | | | NA |  |
|  | 2.6 Was an appropriate analysis used to estimate the effect of assignment to intervention? | | | Y | Excluded participants were those who did not complete all questions in the study. |
|  | 2.7 If N/PN/NI to 2.6: Was there potential for a substantial impact (on the result) of the failure to analyse participants in the group to which they were randomized? | | | NA |  |
|  | **Risk of bias judgement** |  |  | **Some concerns** |  |
| **Bias due to missing outcome data** | 3.1 Were data for this outcome available for all, or nearly all, participants randomized? | | | Y | Before exclusions, we attained N = 422, with approximately 105 participants in each group. After exclusions, each team had data from approximately 80 participants (see Table 1 for specifics), for a total of 353 participants across the four replications. |
|  | 3.2 If N/PN/NI to 3.1: Is there evidence that result was not biased by missing outcome data? | | | NA |  |
|  | 3.3 If N/PN to 3.2: Could missingness in the outcome depend on its true value? | |  | NA |  |
|  | 3.4 If Y/PY/NI to 3.3: Is it likely that missingness in the outcome depended on its true value? | | | NA |  |
|  | **Risk of bias judgement** |  |  | **Low** |  |
| **Bias in measurement of the outcome** | 4.1 Was the method of measuring the outcome inappropriate? | |  | N | These were pooled and each team selected from this pool 24 false and 8 true Tweets that they believed were best suited for the experiment. |
|  | 4.2 Could measurement or ascertainment of the outcome have differed between intervention groups? | | | N | Each team modified the informed consent and the instructions in the pretest and post-test portions of the experiment to update and Canadianize them. |
|  | 4.3 Were outcome assessors aware of the intervention received by study participants? | | | PY | Post-test after intervention, subject may know. |
|  | 4.4 If Y/PY/NI to 4.3: Could assessment of the outcome have been influenced by knowledge of intervention received? | | | N | It is self-reported by the subject, not the subject. |
|  | 4.5 If Y/PY/NI to 4.4: Is it likely that assessment of the outcome was influenced by knowledge of intervention received? | | | NA |  |
|  | **Risk of bias judgement** |  |  | **Low** |  |
| **Bias in selection of the reported result** | 5.1 Were the data that produced this result analysed in accordance with a pre-specified analysis plan that was finalized before unblinded outcome data were available for analysis? | | | NI |  |
|  | 5.2 ... multiple eligible outcome measurements (e.g. scales, definitions, time points) within the outcome domain? | | | NI |  |
|  | 5.3 ... multiple eligible analyses of the data? |  |  | NI |  |
|  | **Risk of bias judgement** |  |  | **Low** | This study conducted a secondary analysis of the dependent variables based on individual original data. |
| **Overall bias** | **Risk of bias judgement** |  |  | **Some concerns** |  |
|  |  |  |  |  |  |
|  |  |  |  |  |  |
| **Unique ID** | 13 | **Study ID** | 7 | **Assessor** | Bai |
| **Ref or Label** |  | **Aim** | assignment to intervention (the 'intention-to-treat' effect) | |  |
| **Experimental** | Inoculation strategies | **Comparator** | Control | **Source** | Journal article(s) |
| **Outcome** | discrimination ability and discrimination criterion | **Results** |  | **Weight** | 1 |
| **Domain** | **Signalling question** |  |  | **Response** | **Comments** |
| **Bias arising from the randomization process** | 1.1 Was the allocation sequence random? |  |  | Y | Participants were randomly assigned to either the Inoculation condition (BNG) or the Control condition (Tetris). |
|  | 1.2 Was the allocation sequence concealed until participants were enrolled and assigned to interventions? | | | PY |  |
|  | 1.3 Did baseline differences between intervention groups suggest a problem with the randomization process? | | | NI | see table1 and figure1. |
|  | **Risk of bias judgement** |  |  | **Low** |  |
| **Bias due to deviations from intended interventions** | 2.1.Were participants aware of their assigned intervention during the trial? | |  | PN | A script rotated assignment of volunteers to the four replications.  The researchers had to know what group the subjects were in before they could intervene.  Participants were randomly assigned to either the Inoculation condition (BNG) or the Control condition (Tetris). |
|  | 2.2.Were carers and people delivering the interventions aware of participants' assigned intervention during the trial? | | | PY |  |
|  | 2.3. If Y/PY/NI to 2.1 or 2.2: Were there deviations from the intended intervention that arose because of the experimental context? | | | NI |  |
|  | 2.4 If Y/PY to 2.3: Were these deviations likely to have affected the outcome? | |  | NA |  |
|  | 2.5. If Y/PY/NI to 2.4: Were these deviations from intended intervention balanced between groups? | | | NA |  |
|  | 2.6 Was an appropriate analysis used to estimate the effect of assignment to intervention? | | | Y | Excluded participants were those who did not complete all questions in the study. |
|  | 2.7 If N/PN/NI to 2.6: Was there potential for a substantial impact (on the result) of the failure to analyse participants in the group to which they were randomized? | | | NA |  |
|  | **Risk of bias judgement** |  |  | **Some concerns** |  |
| **Bias due to missing outcome data** | 3.1 Were data for this outcome available for all, or nearly all, participants randomized? | | | Y | Before exclusions, we attained N = 422, with approximately 105 participants in each group. After exclusions, each team had data from approximately 80 participants (see Table 1 for specifics), for a total of 353 participants across the four replications. |
|  | 3.2 If N/PN/NI to 3.1: Is there evidence that result was not biased by missing outcome data? | | | NA |  |
|  | 3.3 If N/PN to 3.2: Could missingness in the outcome depend on its true value? | |  | NA |  |
|  | 3.4 If Y/PY/NI to 3.3: Is it likely that missingness in the outcome depended on its true value? | | | NA |  |
|  | **Risk of bias judgement** |  |  | **Low** |  |
| **Bias in measurement of the outcome** | 4.1 Was the method of measuring the outcome inappropriate? | |  | N | These were pooled and each team selected from this pool 24 false and 8 true Tweets that they believed were best suited for the experiment. |
|  | 4.2 Could measurement or ascertainment of the outcome have differed between intervention groups? | | | N | Each team modified the informed consent and the instructions in the pretest and post-test portions of the experiment to update and Canadianize them. |
|  | 4.3 Were outcome assessors aware of the intervention received by study participants? | | | PY | Post-test after intervention, subject may know. |
|  | 4.4 If Y/PY/NI to 4.3: Could assessment of the outcome have been influenced by knowledge of intervention received? | | | N | It is self-reported by the subject, not the subject. |
|  | 4.5 If Y/PY/NI to 4.4: Is it likely that assessment of the outcome was influenced by knowledge of intervention received? | | | NA |  |
|  | **Risk of bias judgement** |  |  | **Low** |  |
| **Bias in selection of the reported result** | 5.1 Were the data that produced this result analysed in accordance with a pre-specified analysis plan that was finalized before unblinded outcome data were available for analysis? | | | NI |  |
|  | 5.2 ... multiple eligible outcome measurements (e.g. scales, definitions, time points) within the outcome domain? | | | NI |  |
|  | 5.3 ... multiple eligible analyses of the data? |  |  | NI |  |
|  | **Risk of bias judgement** |  |  | **Low** | This study conducted a secondary analysis of the dependent variables based on individual original data. |
| **Overall bias** | **Risk of bias judgement** |  |  | **Some concerns** |  |
|  |  |  |  |  |  |
|  |  |  |  |  |  |
| **Unique ID** | 14 | **Study ID** | 7 | **Assessor** | Bai |
| **Ref or Label** |  | **Aim** | assignment to intervention (the 'intention-to-treat' effect) | |  |
| **Experimental** | Inoculation strategies | **Comparator** | Control | **Source** | Journal article(s) |
| **Outcome** | discrimination ability and discrimination criterion | **Results** |  | **Weight** | 1 |
| **Domain** | **Signalling question** |  |  | **Response** | **Comments** |
| **Bias arising from the randomization process** | 1.1 Was the allocation sequence random? |  |  | Y | Participants were randomly assigned to either the Inoculation condition (BNG) or the Control condition (Tetris). |
|  | 1.2 Was the allocation sequence concealed until participants were enrolled and assigned to interventions? | | | PY |  |
|  | 1.3 Did baseline differences between intervention groups suggest a problem with the randomization process? | | | NI |  |
|  | **Risk of bias judgement** |  |  | **Low** |  |
| **Bias due to deviations from intended interventions** | 2.1.Were participants aware of their assigned intervention during the trial? | |  | PN | A script rotated assignment of volunteers to the four replications.  The researchers had to know what group the subjects were in before they could intervene.  Participants were randomly assigned to either the Inoculation condition (BNG) or the Control condition (Tetris). |
|  | 2.2.Were carers and people delivering the interventions aware of participants' assigned intervention during the trial? | | | PY |  |
|  | 2.3. If Y/PY/NI to 2.1 or 2.2: Were there deviations from the intended intervention that arose because of the experimental context? | | | NI |  |
|  | 2.4 If Y/PY to 2.3: Were these deviations likely to have affected the outcome? | |  | NA |  |
|  | 2.5. If Y/PY/NI to 2.4: Were these deviations from intended intervention balanced between groups? | | | NA |  |
|  | 2.6 Was an appropriate analysis used to estimate the effect of assignment to intervention? | | | Y | Excluded participants were those who did not complete all questions in the study. |
|  | 2.7 If N/PN/NI to 2.6: Was there potential for a substantial impact (on the result) of the failure to analyse participants in the group to which they were randomized? | | | NA |  |
|  | **Risk of bias judgement** |  |  | **Some concerns** |  |
| **Bias due to missing outcome data** | 3.1 Were data for this outcome available for all, or nearly all, participants randomized? | | | Y | Before exclusions, we attained N = 422, with approximately 105 participants in each group. After exclusions, each team had data from approximately 80 participants (see Table 1 for specifics), for a total of 353 participants across the four replications. |
|  | 3.2 If N/PN/NI to 3.1: Is there evidence that result was not biased by missing outcome data? | | | NA |  |
|  | 3.3 If N/PN to 3.2: Could missingness in the outcome depend on its true value? | |  | NA |  |
|  | 3.4 If Y/PY/NI to 3.3: Is it likely that missingness in the outcome depended on its true value? | | | NA |  |
|  | **Risk of bias judgement** |  |  | **Low** |  |
| **Bias in measurement of the outcome** | 4.1 Was the method of measuring the outcome inappropriate? | |  | N | These were pooled and each team selected from this pool 24 false and 8 true Tweets that they believed were best suited for the experiment. |
|  | 4.2 Could measurement or ascertainment of the outcome have differed between intervention groups? | | | N | Each team modified the informed consent and the instructions in the pretest and post-test portions of the experiment to update and Canadianize them. |
|  | 4.3 Were outcome assessors aware of the intervention received by study participants? | | | PY | Post-test after intervention, subject may know. |
|  | 4.4 If Y/PY/NI to 4.3: Could assessment of the outcome have been influenced by knowledge of intervention received? | | | N | It is self-reported by the subject, not the subject. |
|  | 4.5 If Y/PY/NI to 4.4: Is it likely that assessment of the outcome was influenced by knowledge of intervention received? | | | NA |  |
|  | **Risk of bias judgement** |  |  | **Low** |  |
| **Bias in selection of the reported result** | 5.1 Were the data that produced this result analysed in accordance with a pre-specified analysis plan that was finalized before unblinded outcome data were available for analysis? | | | NI |  |
|  | 5.2 ... multiple eligible outcome measurements (e.g. scales, definitions, time points) within the outcome domain? | | | NI |  |
|  | 5.3 ... multiple eligible analyses of the data? |  |  | NI |  |
|  | **Risk of bias judgement** |  |  | **Low** | This study conducted a secondary analysis of the dependent variables based on individual original data. |
| **Overall bias** | **Risk of bias judgement** |  |  | **Some concerns** |  |
|  |  |  |  |  |  |
|  |  |  |  |  |  |
| **Unique ID** | 15 | **Study ID** | 7 | **Assessor** | Bai |
| **Ref or Label** |  | **Aim** | assignment to intervention (the 'intention-to-treat' effect) | |  |
| **Experimental** | Inoculation strategies | **Comparator** | Control | **Source** | Journal article(s) |
| **Outcome** | discrimination ability and discrimination criterion | **Results** |  | **Weight** | 1 |
| **Domain** | **Signalling question** |  |  | **Response** | **Comments** |
| **Bias arising from the randomization process** | 1.1 Was the allocation sequence random? |  |  | Y | Participants were randomly assigned to either the Inoculation condition (BNG) or the Control condition (Tetris). |
|  | 1.2 Was the allocation sequence concealed until participants were enrolled and assigned to interventions? | | | PY |  |
|  | 1.3 Did baseline differences between intervention groups suggest a problem with the randomization process? | | | NI |  |
|  | **Risk of bias judgement** |  |  | **Low** |  |
| **Bias due to deviations from intended interventions** | 2.1.Were participants aware of their assigned intervention during the trial? | |  | PN | A script rotated assignment of volunteers to the four replications.  The researchers had to know what group the subjects were in before they could intervene.  Participants were randomly assigned to either the Inoculation condition (BNG) or the Control condition (Tetris). |
|  | 2.2.Were carers and people delivering the interventions aware of participants' assigned intervention during the trial? | | | PY |  |
|  | 2.3. If Y/PY/NI to 2.1 or 2.2: Were there deviations from the intended intervention that arose because of the experimental context? | | | NI |  |
|  | 2.4 If Y/PY to 2.3: Were these deviations likely to have affected the outcome? | |  | NA |  |
|  | 2.5. If Y/PY/NI to 2.4: Were these deviations from intended intervention balanced between groups? | | | NA |  |
|  | 2.6 Was an appropriate analysis used to estimate the effect of assignment to intervention? | | | Y | Excluded participants were those who did not complete all questions in the study. |
|  | 2.7 If N/PN/NI to 2.6: Was there potential for a substantial impact (on the result) of the failure to analyse participants in the group to which they were randomized? | | | NA |  |
|  | **Risk of bias judgement** |  |  | **Some concerns** |  |
| **Bias due to missing outcome data** | 3.1 Were data for this outcome available for all, or nearly all, participants randomized? | | | Y | Before exclusions, we attained N = 422, with approximately 105 participants in each group. After exclusions, each team had data from approximately 80 participants (see Table 1 for specifics), for a total of 353 participants across the four replications. |
|  | 3.2 If N/PN/NI to 3.1: Is there evidence that result was not biased by missing outcome data? | | | NA |  |
|  | 3.3 If N/PN to 3.2: Could missingness in the outcome depend on its true value? | |  | NA |  |
|  | 3.4 If Y/PY/NI to 3.3: Is it likely that missingness in the outcome depended on its true value? | | | NA |  |
|  | **Risk of bias judgement** |  |  | **Low** |  |
| **Bias in measurement of the outcome** | 4.1 Was the method of measuring the outcome inappropriate? | |  | N | These were pooled and each team selected from this pool 24 false and 8 true Tweets that they believed were best suited for the experiment. |
|  | 4.2 Could measurement or ascertainment of the outcome have differed between intervention groups? | | | N | Each team modified the informed consent and the instructions in the pretest and post-test portions of the experiment to update and Canadianize them. |
|  | 4.3 Were outcome assessors aware of the intervention received by study participants? | | | PY | Post-test after intervention, subject may know. |
|  | 4.4 If Y/PY/NI to 4.3: Could assessment of the outcome have been influenced by knowledge of intervention received? | | | N | It is self-reported by the subject, not the subject. |
|  | 4.5 If Y/PY/NI to 4.4: Is it likely that assessment of the outcome was influenced by knowledge of intervention received? | | | NA |  |
|  | **Risk of bias judgement** |  |  | **Low** |  |
| **Bias in selection of the reported result** | 5.1 Were the data that produced this result analysed in accordance with a pre-specified analysis plan that was finalized before unblinded outcome data were available for analysis? | | | NI |  |
|  | 5.2 ... multiple eligible outcome measurements (e.g. scales, definitions, time points) within the outcome domain? | | | NI |  |
|  | 5.3 ... multiple eligible analyses of the data? |  |  | NI |  |
|  | **Risk of bias judgement** |  |  | **Low** | This study conducted a secondary analysis of the dependent variables based on individual original data. |
| **Overall bias** | **Risk of bias judgement** |  |  | **Some concerns** |  |
|  |  |  |  |  |  |
|  |  |  |  |  |  |
| **Unique ID** | 16 | **Study ID** | 8 | **Assessor** | Bai |
| **Ref or Label** |  | **Aim** | assignment to intervention (the 'intention-to-treat' effect) | |  |
| **Experimental** | Media literacy | **Comparator** | Control | **Source** | Journal article(s) |
| **Outcome** | discrimination ability and discrimination criterion | **Results** |  | **Weight** | 1 |
| **Domain** | **Signalling question** |  |  | **Response** | **Comments** |
| **Bias arising from the randomization process** | 1.1 Was the allocation sequence random? |  |  | Y | Corresponding to the 3 × 2 factorial design, the participants were randomly assigned to the experimental conditions. |
|  | 1.2 Was the allocation sequence concealed until participants were enrolled and assigned to interventions? | | | PY |  |
|  | 1.3 Did baseline differences between intervention groups suggest a problem with the randomization process? | | | N | There were no significant demographic differences between the experimental groups. |
|  | **Risk of bias judgement** |  |  | **Low** |  |
| **Bias due to deviations from intended interventions** | 2.1.Were participants aware of their assigned intervention during the trial? | |  | PN | Corresponding to the 3 × 2 factorial design, the participants were randomly assigned to the experimental conditions.  All activities were performed online, excepting 16 participants from the cognitive apprenticeship group who met in person with the trainers. |
|  | 2.2.Were carers and people delivering the interventions aware of participants' assigned intervention during the trial? | | | PN |  |
|  | 2.3. If Y/PY/NI to 2.1 or 2.2: Were there deviations from the intended intervention that arose because of the experimental context? | | | NA |  |
|  | 2.4 If Y/PY to 2.3: Were these deviations likely to have affected the outcome? | |  | NA |  |
|  | 2.5. If Y/PY/NI to 2.4: Were these deviations from intended intervention balanced between groups? | | | NA |  |
|  | 2.6 Was an appropriate analysis used to estimate the effect of assignment to intervention? | | | Y | Removing incomplete and invalid data, as well as the participants who reported that they did not use lateral reading to eval-uate the news in post-test (treatment check), the study relied on a total sample of N = 312 participants, out of which 172 were female, 139 male, and 1 non-binary. |
|  | 2.7 If N/PN/NI to 2.6: Was there potential for a substantial impact (on the result) of the failure to analyse participants in the group to which they were randomized? | | | NA |  |
|  | **Risk of bias judgement** |  |  | **Low** |  |
| **Bias due to missing outcome data** | 3.1 Were data for this outcome available for all, or nearly all, participants randomized? | | | NI |  |
|  | 3.2 If N/PN/NI to 3.1: Is there evidence that result was not biased by missing outcome data? | | | PY | Removing incomplete and invalid data, as well as the participants who reported that they did not use lateral reading to eval-uate the news in post-test (treatment check), |
|  | 3.3 If N/PN to 3.2: Could missingness in the outcome depend on its true value? | |  | NA |  |
|  | 3.4 If Y/PY/NI to 3.3: Is it likely that missingness in the outcome depended on its true value? | | | NA |  |
|  | **Risk of bias judgement** |  |  | **Low** |  |
| **Bias in measurement of the outcome** | 4.1 Was the method of measuring the outcome inappropriate? | |  | N | All articles were taken from German online news sources and themati-cally targeted the Covid-19 pandemic. |
|  | 4.2 Could measurement or ascertainment of the outcome have differed between intervention groups? | | | N | We assessed participants’ ability to discern truthful from fake news by showing them 3 truthful and 3 fake news articles in pre- and the same number of (different) articles in post-test. |
|  | 4.3 Were outcome assessors aware of the intervention received by study participants? | | | PN | All activities were performed online, excepting 16 participants from the cognitive apprenticeship group who met in person with the trainers. |
|  | 4.4 If Y/PY/NI to 4.3: Could assessment of the outcome have been influenced by knowledge of intervention received? | | | NA |  |
|  | 4.5 If Y/PY/NI to 4.4: Is it likely that assessment of the outcome was influenced by knowledge of intervention received? | | | NA |  |
|  | **Risk of bias judgement** |  |  | **Low** |  |
| **Bias in selection of the reported result** | 5.1 Were the data that produced this result analysed in accordance with a pre-specified analysis plan that was finalized before unblinded outcome data were available for analysis? | | | NI |  |
|  | 5.2 ... multiple eligible outcome measurements (e.g. scales, definitions, time points) within the outcome domain? | | | NI |  |
|  | 5.3 ... multiple eligible analyses of the data? |  |  | NI |  |
|  | **Risk of bias judgement** |  |  | **Low** | This study conducted a secondary analysis of the dependent variables based on individual original data. |
| **Overall bias** | **Risk of bias judgement** |  |  | **Low** |  |
|  |  |  |  |  |  |
|  |  |  |  |  |  |
| **Unique ID** | 17 | **Study ID** | 9 | **Assessor** | Bai |
| **Ref or Label** |  | **Aim** | assignment to intervention (the 'intention-to-treat' effect) | |  |
| **Experimental** | Inoculation strategies.Feedback | **Comparator** | Control | **Source** | Journal article(s) |
| **Outcome** | discrimination ability and discrimination criterion | **Results** |  | **Weight** | 1 |
| **Domain** | **Signalling question** |  |  | **Response** | **Comments** |
| **Bias arising from the randomization process** | 1.1 Was the allocation sequence random? |  |  | Y | Of the 282 participants in the final sample, 72 were randomly assigned to the baseline condition and 70 were randomly assigned to each of the nongamified, gamified, and Bad News conditions. |
|  | 1.2 Was the allocation sequence concealed until participants were enrolled and assigned to interventions? | | | PY |  |
|  | 1.3 Did baseline differences between intervention groups suggest a problem with the randomization process? | | | NI |  |
|  | **Risk of bias judgement** |  |  | **Low** |  |
| **Bias due to deviations from intended interventions** | 2.1.Were participants aware of their assigned intervention during the trial? | |  | PN | online study, participants could use any web browser and computer of their choosing.  Of the 282 participants in the final sample, 72 were randomly assigned to the baseline condition and 70 were randomly assigned to each of the nongamified, gamified, and Bad News conditions. |
|  | 2.2.Were carers and people delivering the interventions aware of participants' assigned intervention during the trial? | | | PN |  |
|  | 2.3. If Y/PY/NI to 2.1 or 2.2: Were there deviations from the intended intervention that arose because of the experimental context? | | | NA |  |
|  | 2.4 If Y/PY to 2.3: Were these deviations likely to have affected the outcome? | |  | NA |  |
|  | 2.5. If Y/PY/NI to 2.4: Were these deviations from intended intervention balanced between groups? | | | NA |  |
|  | 2.6 Was an appropriate analysis used to estimate the effect of assignment to intervention? | | | Y | After excluding 18 participants for failing attention checks, the final sample consisted of 282 individuals. |
|  | 2.7 If N/PN/NI to 2.6: Was there potential for a substantial impact (on the result) of the failure to analyse participants in the group to which they were randomized? | | | NA |  |
|  | **Risk of bias judgement** |  |  | **Low** |  |
| **Bias due to missing outcome data** | 3.1 Were data for this outcome available for all, or nearly all, participants randomized? | | | Y | After excluding 18 participants for failing attention checks, the final sample consisted of 282 individuals. |
|  | 3.2 If N/PN/NI to 3.1: Is there evidence that result was not biased by missing outcome data? | | | NA |  |
|  | 3.3 If N/PN to 3.2: Could missingness in the outcome depend on its true value? | |  | NA |  |
|  | 3.4 If Y/PY/NI to 3.3: Is it likely that missingness in the outcome depended on its true value? | | | NA |  |
|  | **Risk of bias judgement** |  |  | **Low** |  |
| **Bias in measurement of the outcome** | 4.1 Was the method of measuring the outcome inappropriate? | |  | N | They were obtained from Brashier et al. (2021), who pilot tested them and determined that they were all comparable in length, similarly familiar to U.S. participants, and equally balanced in terms of the political viewpoint they favored. |
|  | 4.2 Could measurement or ascertainment of the outcome have differed between intervention groups? | | | N | After this, participants in these three conditions were finally presented with the test phase. |
|  | 4.3 Were outcome assessors aware of the intervention received by study participants? | | | PN | online study, participants could use any web browser and computer of their choosing |
|  | 4.4 If Y/PY/NI to 4.3: Could assessment of the outcome have been influenced by knowledge of intervention received? | | | NA |  |
|  | 4.5 If Y/PY/NI to 4.4: Is it likely that assessment of the outcome was influenced by knowledge of intervention received? | | | NA |  |
|  | **Risk of bias judgement** |  |  | **Low** |  |
| **Bias in selection of the reported result** | 5.1 Were the data that produced this result analysed in accordance with a pre-specified analysis plan that was finalized before unblinded outcome data were available for analysis? | | | NI |  |
|  | 5.2 ... multiple eligible outcome measurements (e.g. scales, definitions, time points) within the outcome domain? | | | NI |  |
|  | 5.3 ... multiple eligible analyses of the data? |  |  | NI |  |
|  | **Risk of bias judgement** |  |  | **Low** | This study conducted a secondary analysis of the dependent variables based on individual original data. |
| **Overall bias** | **Risk of bias judgement** |  |  | **Low** |  |
|  |  |  |  |  |  |
|  |  |  |  |  |  |
| **Unique ID** | 18 | **Study ID** | 10 | **Assessor** | Bai |
| **Ref or Label** |  | **Aim** | assignment to intervention (the 'intention-to-treat' effect) | |  |
| **Experimental** | Media literacy | **Comparator** | Control | **Source** | Journal article(s) |
| **Outcome** | discrimination ability and discrimination criterion | **Results** |  | **Weight** | 1 |
| **Domain** | **Signalling question** |  |  | **Response** | **Comments** |
| **Bias arising from the randomization process** | 1.1 Was the allocation sequence random? |  |  | Y | Respondents completed a pre-treatment questionnaire that included measures of all predictors used in our observational analyses, as well as all moderators used in our analyses of treatment effects. They were then randomly assigned to one of the three treatment conditions and also randomly assigned to provide one of the two outcome meas-ures. |
|  | 1.2 Was the allocation sequence concealed until participants were enrolled and assigned to interventions? | | | PY |  |
|  | 1.3 Did baseline differences between intervention groups suggest a problem with the randomization process? | | | NI |  |
|  | **Risk of bias judgement** |  |  | **Low** |  |
| **Bias due to deviations from intended interventions** | 2.1.Were participants aware of their assigned intervention during the trial? | |  | PN | They were then randomly assigned to one of the three treatment conditions and also randomly assigned to provide one of the two outcome measures.  The researchers had to know what group the subjects were in before they could intervene. |
|  | 2.2.Were carers and people delivering the interventions aware of participants' assigned intervention during the trial? | | | PY |  |
|  | 2.3. If Y/PY/NI to 2.1 or 2.2: Were there deviations from the intended intervention that arose because of the experimental context? | | | NI |  |
|  | 2.4 If Y/PY to 2.3: Were these deviations likely to have affected the outcome? | |  | NA |  |
|  | 2.5. If Y/PY/NI to 2.4: Were these deviations from intended intervention balanced between groups? | | | NA |  |
|  | 2.6 Was an appropriate analysis used to estimate the effect of assignment to intervention? | | | PY | After each set, respondents answered a com-prehension check question asking them to identify one of the tips they had just read. In the generic tips condition, 64% of respondents got all three checks correct; 87% got at least two correct (M = 2.49, SD = 0.76). In the BOAST condition, 49% of respondents got all three correct, 84% got at least two correct (M = 2.28, SD = 0.84). We include balance checks in Tables D.1 and D.2. |
|  | 2.7 If N/PN/NI to 2.6: Was there potential for a substantial impact (on the result) of the failure to analyse participants in the group to which they were randomized? | | | NA |  |
|  | **Risk of bias judgement** |  |  | **Some concerns** |  |
| **Bias due to missing outcome data** | 3.1 Were data for this outcome available for all, or nearly all, participants randomized? | | | Y | After each set, respondents answered a com-prehension check question asking them to identify one of the tips they had just read. In the generic tips condition, 64% of respondents got all three checks correct; 87% got at least two correct (M = 2.49, SD = 0.76). In the BOAST condition, 49% of respondents got all three correct, 84% got at least two correct (M = 2.28, SD = 0.84). We include balance checks in Tables D.1 and D.2. |
|  | 3.2 If N/PN/NI to 3.1: Is there evidence that result was not biased by missing outcome data? | | | NA |  |
|  | 3.3 If N/PN to 3.2: Could missingness in the outcome depend on its true value? | |  | NA |  |
|  | 3.4 If Y/PY/NI to 3.3: Is it likely that missingness in the outcome depended on its true value? | | | NA |  |
|  | **Risk of bias judgement** |  |  | **Low** |  |
| **Bias in measurement of the outcome** | 4.1 Was the method of measuring the outcome inappropriate? | |  | N | The articles, all of which were actual online news stories available to us prior to our field date, were published by actual on-line sources. |
|  | 4.2 Could measurement or ascertainment of the outcome have differed between intervention groups? | | | N | In the accuracy-outcome condition, we looked at perceived accuracy for each news type (accurate and inaccurate) at the headline (item) level. |
|  | 4.3 Were outcome assessors aware of the intervention received by study participants? | | | PY | Post-test after intervention, subject may know. |
|  | 4.4 If Y/PY/NI to 4.3: Could assessment of the outcome have been influenced by knowledge of intervention received? | | | N | It is self-reported by the subject, not the subject. |
|  | 4.5 If Y/PY/NI to 4.4: Is it likely that assessment of the outcome was influenced by knowledge of intervention received? | | | NA |  |
|  | **Risk of bias judgement** |  |  | **Low** |  |
| **Bias in selection of the reported result** | 5.1 Were the data that produced this result analysed in accordance with a pre-specified analysis plan that was finalized before unblinded outcome data were available for analysis? | | | NI |  |
|  | 5.2 ... multiple eligible outcome measurements (e.g. scales, definitions, time points) within the outcome domain? | | | NI |  |
|  | 5.3 ... multiple eligible analyses of the data? |  |  | NI |  |
|  | **Risk of bias judgement** |  |  | **Low** | This study conducted a secondary analysis of the dependent variables based on individual original data. |
| **Overall bias** | **Risk of bias judgement** |  |  | **Some concerns** |  |
|  |  |  |  |  |  |
|  |  |  |  |  |  |
| **Unique ID** | 19 | **Study ID** | 11 | **Assessor** | Bai |
| **Ref or Label** |  | **Aim** | assignment to intervention (the 'intention-to-treat' effect) | |  |
| **Experimental** | Media literacy | **Comparator** | Control | **Source** | Journal article(s); Statistical analysis plan (SAP); “Grey literature” (e.g. unpublished thesis) |
| **Outcome** | discrimination ability and discrimination criterion | **Results** |  | **Weight** | 1 |
| **Domain** | **Signalling question** |  |  | **Response** | **Comments** |
| **Bias arising from the randomization process** | 1.1 Was the allocation sequence random? |  |  | Y | Each participant was randomly assigned to one of six treatment conditions or a control group |
|  | 1.2 Was the allocation sequence concealed until participants were enrolled and assigned to interventions? | | | PY |  |
|  | 1.3 Did baseline differences between intervention groups suggest a problem with the randomization process? | | | N | B.5.1 Demographic Comparisons between Compliers and Non-Compliers t-test Results |
|  | **Risk of bias judgement** |  |  | **Low** |  |
| **Bias due to deviations from intended interventions** | 2.1.Were participants aware of their assigned intervention during the trial? | |  | PN | Each participant was randomly assigned to one of six treatment conditions or a control group.  The researchers had to know what group the subjects were in before they could intervene. |
|  | 2.2.Were carers and people delivering the interventions aware of participants' assigned intervention during the trial? | | | PY |  |
|  | 2.3. If Y/PY/NI to 2.1 or 2.2: Were there deviations from the intended intervention that arose because of the experimental context? | | | NI |  |
|  | 2.4 If Y/PY to 2.3: Were these deviations likely to have affected the outcome? | |  | NA |  |
|  | 2.5. If Y/PY/NI to 2.4: Were these deviations from intended intervention balanced between groups? | | | NA |  |
|  | 2.6 Was an appropriate analysis used to estimate the effect of assignment to intervention? | | | Y | To make sure any observed treatment effects are due to our manipulations, we present participants with a statement depending on the treatment they were assigned to. |
|  | 2.7 If N/PN/NI to 2.6: Was there potential for a substantial impact (on the result) of the failure to analyse participants in the group to which they were randomized? | | | NA |  |
|  | **Risk of bias judgement** |  |  | **Some concerns** |  |
| **Bias due to missing outcome data** | 3.1 Were data for this outcome available for all, or nearly all, participants randomized? | | | NI |  |
|  | 3.2 If N/PN/NI to 3.1: Is there evidence that result was not biased by missing outcome data? | | | Y | Figure B30: Supplementary Table 3: HK Compliers and Non-Compliers t-test Results |
|  | 3.3 If N/PN to 3.2: Could missingness in the outcome depend on its true value? | |  | NA |  |
|  | 3.4 If Y/PY/NI to 3.3: Is it likely that missingness in the outcome depended on its true value? | | | NA |  |
|  | **Risk of bias judgement** |  |  | **Low** |  |
| **Bias in measurement of the outcome** | 4.1 Was the method of measuring the outcome inappropriate? | |  | N | The false statements were self-fabricated (that is, made up), and both the true and the false state-ments were selected from a pre-tested pool of claims |
|  | 4.2 Could measurement or ascertainment of the outcome have differed between intervention groups? | | | PN | After exposure to treatment, the participants were redirected to the questionnaire measuring the core outcomes (Supplementary Section B.2) |
|  | 4.3 Were outcome assessors aware of the intervention received by study participants? | | | PY | Post-test after intervention, subject may know. |
|  | 4.4 If Y/PY/NI to 4.3: Could assessment of the outcome have been influenced by knowledge of intervention received? | | | N | It is self-reported by the subject, not the subject. |
|  | 4.5 If Y/PY/NI to 4.4: Is it likely that assessment of the outcome was influenced by knowledge of intervention received? | | | NA |  |
|  | **Risk of bias judgement** |  |  | **Low** |  |
| **Bias in selection of the reported result** | 5.1 Were the data that produced this result analysed in accordance with a pre-specified analysis plan that was finalized before unblinded outcome data were available for analysis? | | | NI |  |
|  | 5.2 ... multiple eligible outcome measurements (e.g. scales, definitions, time points) within the outcome domain? | | | NI |  |
|  | 5.3 ... multiple eligible analyses of the data? |  |  | NI |  |
|  | **Risk of bias judgement** |  |  | **Low** | This study conducted a secondary analysis of the dependent variables based on individual original data. |
| **Overall bias** | **Risk of bias judgement** |  |  | **Some concerns** |  |
|  |  |  |  |  |  |
|  |  |  |  |  |  |
| **Unique ID** | 20 | **Study ID** | 11 | **Assessor** | Bai |
| **Ref or Label** |  | **Aim** | assignment to intervention (the 'intention-to-treat' effect) | |  |
| **Experimental** | Media literacy | **Comparator** | Control | **Source** | Journal article(s); Statistical analysis plan (SAP) |
| **Outcome** | discrimination ability and discrimination criterion | **Results** |  | **Weight** | 1 |
| **Domain** | **Signalling question** |  |  | **Response** | **Comments** |
| **Bias arising from the randomization process** | 1.1 Was the allocation sequence random? |  |  | Y | Each participant was randomly assigned to one of six treatment conditions or a control group |
|  | 1.2 Was the allocation sequence concealed until participants were enrolled and assigned to interventions? | | | PY |  |
|  | 1.3 Did baseline differences between intervention groups suggest a problem with the randomization process? | | | N | B.5.1 Demographic Comparisons between Compliers and Non-Compliers t-test Results |
|  | **Risk of bias judgement** |  |  | **Low** |  |
| **Bias due to deviations from intended interventions** | 2.1.Were participants aware of their assigned intervention during the trial? | |  | PN | Each participant was randomly assigned to one of six treatment conditions or a control group.  The researchers had to know what group the subjects were in before they could intervene. |
|  | 2.2.Were carers and people delivering the interventions aware of participants' assigned intervention during the trial? | | | PY |  |
|  | 2.3. If Y/PY/NI to 2.1 or 2.2: Were there deviations from the intended intervention that arose because of the experimental context? | | | NI |  |
|  | 2.4 If Y/PY to 2.3: Were these deviations likely to have affected the outcome? | |  | NA |  |
|  | 2.5. If Y/PY/NI to 2.4: Were these deviations from intended intervention balanced between groups? | | | NA |  |
|  | 2.6 Was an appropriate analysis used to estimate the effect of assignment to intervention? | | | Y | To make sure any observed treatment effects are due to our manipulations, we present participants with a statement depending on the treatment they were assigned to. |
|  | 2.7 If N/PN/NI to 2.6: Was there potential for a substantial impact (on the result) of the failure to analyse participants in the group to which they were randomized? | | | NA |  |
|  | **Risk of bias judgement** |  |  | **Some concerns** |  |
| **Bias due to missing outcome data** | 3.1 Were data for this outcome available for all, or nearly all, participants randomized? | | | NI |  |
|  | 3.2 If N/PN/NI to 3.1: Is there evidence that result was not biased by missing outcome data? | | |  | Figure B29: Supplementary Table 2: PL Compliers and Non-Compliers t-test Results |
|  | 3.3 If N/PN to 3.2: Could missingness in the outcome depend on its true value? | |  | NA |  |
|  | 3.4 If Y/PY/NI to 3.3: Is it likely that missingness in the outcome depended on its true value? | | | NA |  |
|  | **Risk of bias judgement** |  |  | **Low** |  |
| **Bias in measurement of the outcome** | 4.1 Was the method of measuring the outcome inappropriate? | |  | N | The false statements were self-fabricated (that is, made up), and both the true and the false state-ments were selected from a pre-tested pool of claims |
|  | 4.2 Could measurement or ascertainment of the outcome have differed between intervention groups? | | | PN | After exposure to treatment, the participants were redirected to the questionnaire measuring the core outcomes (Supplementary Section B.2) |
|  | 4.3 Were outcome assessors aware of the intervention received by study participants? | | | PY | Post-test after intervention, subject may know. |
|  | 4.4 If Y/PY/NI to 4.3: Could assessment of the outcome have been influenced by knowledge of intervention received? | | | N | It is self-reported by the subject, not the subject. |
|  | 4.5 If Y/PY/NI to 4.4: Is it likely that assessment of the outcome was influenced by knowledge of intervention received? | | | NA |  |
|  | **Risk of bias judgement** |  |  | **Low** |  |
| **Bias in selection of the reported result** | 5.1 Were the data that produced this result analysed in accordance with a pre-specified analysis plan that was finalized before unblinded outcome data were available for analysis? | | | NI |  |
|  | 5.2 ... multiple eligible outcome measurements (e.g. scales, definitions, time points) within the outcome domain? | | | NI |  |
|  | 5.3 ... multiple eligible analyses of the data? |  |  | NI |  |
|  | **Risk of bias judgement** |  |  | **Low** | This study conducted a secondary analysis of the dependent variables based on individual original data. |
| **Overall bias** | **Risk of bias judgement** |  |  | **Some concerns** |  |
|  |  |  |  |  |  |
|  |  |  |  |  |  |
| **Unique ID** | 21 | **Study ID** | 11 | **Assessor** | Bai |
| **Ref or Label** |  | **Aim** | assignment to intervention (the 'intention-to-treat' effect) | |  |
| **Experimental** | Media literacy | **Comparator** | Control | **Source** | Journal article(s); Statistical analysis plan (SAP) |
| **Outcome** | discrimination ability and discrimination criterion | **Results** |  | **Weight** | 1 |
| **Domain** | **Signalling question** |  |  | **Response** | **Comments** |
| **Bias arising from the randomization process** | 1.1 Was the allocation sequence random? |  |  | Y | Each participant was randomly assigned to one of six treatment conditions or a control group |
|  | 1.2 Was the allocation sequence concealed until participants were enrolled and assigned to interventions? | | | PY |  |
|  | 1.3 Did baseline differences between intervention groups suggest a problem with the randomization process? | | | N | B.5.1 Demographic Comparisons between Compliers and Non-Compliers t-test Results |
|  | **Risk of bias judgement** |  |  | **Low** |  |
| **Bias due to deviations from intended interventions** | 2.1.Were participants aware of their assigned intervention during the trial? | |  | PN | Each participant was randomly assigned to one of six treatment conditions or a control group.  The researchers had to know what group the subjects were in before they could intervene. |
|  | 2.2.Were carers and people delivering the interventions aware of participants' assigned intervention during the trial? | | | PY |  |
|  | 2.3. If Y/PY/NI to 2.1 or 2.2: Were there deviations from the intended intervention that arose because of the experimental context? | | | NI |  |
|  | 2.4 If Y/PY to 2.3: Were these deviations likely to have affected the outcome? | |  | NA |  |
|  | 2.5. If Y/PY/NI to 2.4: Were these deviations from intended intervention balanced between groups? | | | NA |  |
|  | 2.6 Was an appropriate analysis used to estimate the effect of assignment to intervention? | | | Y | To make sure any observed treatment effects are due to our manipulations, we present participants with a statement depending on the treatment they were assigned to. |
|  | 2.7 If N/PN/NI to 2.6: Was there potential for a substantial impact (on the result) of the failure to analyse participants in the group to which they were randomized? | | | NA |  |
|  | **Risk of bias judgement** |  |  | **Some concerns** |  |
| **Bias due to missing outcome data** | 3.1 Were data for this outcome available for all, or nearly all, participants randomized? | | | NI |  |
|  | 3.2 If N/PN/NI to 3.1: Is there evidence that result was not biased by missing outcome data? | | | Y | Figure B28: Supplementary Table 1: US Compliers and Non-Compliers t-test Results |
|  | 3.3 If N/PN to 3.2: Could missingness in the outcome depend on its true value? | |  | NA |  |
|  | 3.4 If Y/PY/NI to 3.3: Is it likely that missingness in the outcome depended on its true value? | | | NA |  |
|  | **Risk of bias judgement** |  |  | **Low** |  |
| **Bias in measurement of the outcome** | 4.1 Was the method of measuring the outcome inappropriate? | |  | N | The false statements were self-fabricated (that is, made up), and both the true and the false state-ments were selected from a pre-tested pool of claims |
|  | 4.2 Could measurement or ascertainment of the outcome have differed between intervention groups? | | | PN | After exposure to treatment, the participants were redirected to the questionnaire measuring the core outcomes (Supplementary Section B.2) |
|  | 4.3 Were outcome assessors aware of the intervention received by study participants? | | | PY | Post-test after intervention, subject may know. |
|  | 4.4 If Y/PY/NI to 4.3: Could assessment of the outcome have been influenced by knowledge of intervention received? | | | N | It is self-reported by the subject, not the subject. |
|  | 4.5 If Y/PY/NI to 4.4: Is it likely that assessment of the outcome was influenced by knowledge of intervention received? | | | NA |  |
|  | **Risk of bias judgement** |  |  | **Low** |  |
| **Bias in selection of the reported result** | 5.1 Were the data that produced this result analysed in accordance with a pre-specified analysis plan that was finalized before unblinded outcome data were available for analysis? | | | NI |  |
|  | 5.2 ... multiple eligible outcome measurements (e.g. scales, definitions, time points) within the outcome domain? | | | NI |  |
|  | 5.3 ... multiple eligible analyses of the data? |  |  | NI |  |
|  | **Risk of bias judgement** |  |  | **Low** | This study conducted a secondary analysis of the dependent variables based on individual original data. |
| **Overall bias** | **Risk of bias judgement** |  |  | **Some concerns** |  |
|  |  |  |  |  |  |
|  |  |  |  |  |  |
| **Unique ID** | 22 | **Study ID** | 12 | **Assessor** | Bai |
| **Ref or Label** |  | **Aim** | assignment to intervention (the 'intention-to-treat' effect) | |  |
| **Experimental** | Writing letters to elders | **Comparator** | Control | **Source** | Journal article(s) |
| **Outcome** | discrimination ability and discrimination criterion | **Results** |  | **Weight** | 1 |
| **Domain** | **Signalling question** |  |  | **Response** | **Comments** |
| **Bias arising from the randomization process** | 1.1 Was the allocation sequence random? |  |  | Y | Among them, 1476 students were randomly assigned to either the treatment (n = 735) or the control condition (n = 741), and 106 students withdrew from the completion before getting the intervention or control materials (for the consort diagram, see Fig. 1). |
|  | 1.2 Was the allocation sequence concealed until participants were enrolled and assigned to interventions? | | | PY |  |
|  | 1.3 Did baseline differences between intervention groups suggest a problem with the randomization process? | | | N | To assess the random allocation of students to different conditions, we examined pre-intervention differences across the aforementioned psychological and sociodemographic variables. Our analysis revealed no statistically significant baseline differences between the two conditions (all ps > 0.058), providing evidence supporting the random condition assignment. |
|  | **Risk of bias judgement** |  |  | **Low** |  |
| **Bias due to deviations from intended interventions** | 2.1.Were participants aware of their assigned intervention during the trial? | |  | PN | Although the control condition closely resembled the intervention in its structure,  The researchers had to know what group the subjects were in before they could intervene. |
|  | 2.2.Were carers and people delivering the interventions aware of participants' assigned intervention during the trial? | | | PY |  |
|  | 2.3. If Y/PY/NI to 2.1 or 2.2: Were there deviations from the intended intervention that arose because of the experimental context? | | | NI |  |
|  | 2.4 If Y/PY to 2.3: Were these deviations likely to have affected the outcome? | |  | NA |  |
|  | 2.5. If Y/PY/NI to 2.4: Were these deviations from intended intervention balanced between groups? | | | NA |  |
|  | 2.6 Was an appropriate analysis used to estimate the effect of assignment to intervention? | | | PY | Researchers will remove participants who have failed manipulative tests during analysis. |
|  | 2.7 If N/PN/NI to 2.6: Was there potential for a substantial impact (on the result) of the failure to analyse participants in the group to which they were randomized? | | | NA |  |
|  | **Risk of bias judgement** |  |  | **Some concerns** |  |
| **Bias due to missing outcome data** | 3.1 Were data for this outcome available for all, or nearly all, participants randomized? | | | Y | These obstacles led to the attrition of 43.6% of students in the follow-up data (N = 832). |
|  | 3.2 If N/PN/NI to 3.1: Is there evidence that result was not biased by missing outcome data? | | | NA |  |
|  | 3.3 If N/PN to 3.2: Could missingness in the outcome depend on its true value? | |  | NA |  |
|  | 3.4 If Y/PY/NI to 3.3: Is it likely that missingness in the outcome depended on its true value? | | | NA |  |
|  | **Risk of bias judgement** |  |  | **Low** |  |
| **Bias in measurement of the outcome** | 4.1 Was the method of measuring the outcome inappropriate? | |  | N | we chose real news articles from trustworthy Hungarian mainstream news sources. We abstained from choosing fact-checked real news because if real content needs to be fact-checked, this might carry ambiguity, potentially prompting readers to question its epistemological status. Conversely, we selected fake news from a webpage (Urbanlegends.hu), which contains fact-checked Hun-garian fake news stories selected from different fake news sites. |
|  | 4.2 Could measurement or ascertainment of the outcome have differed between intervention groups? | | | N | After writing the letters, students were presented with real and fake news items in a random order, and they had to evaluate the perceived accuracy of the headlines. At the end of the first data collection round, students could find out which news stories were true, and which were false. Four weeks later, they completed the follow-up test containing real and fake news items (different ones than in the first data collection round), and then they were debriefed for the real purpose of the study. The timeline of the study can be seen in Fig. 2. |
|  | 4.3 Were outcome assessors aware of the intervention received by study participants? | | | PY | Post-test after intervention, subject may know. |
|  | 4.4 If Y/PY/NI to 4.3: Could assessment of the outcome have been influenced by knowledge of intervention received? | | | N | It is self-reported by the subject, not the subject. |
|  | 4.5 If Y/PY/NI to 4.4: Is it likely that assessment of the outcome was influenced by knowledge of intervention received? | | | NA |  |
|  | **Risk of bias judgement** |  |  | **Low** |  |
| **Bias in selection of the reported result** | 5.1 Were the data that produced this result analysed in accordance with a pre-specified analysis plan that was finalized before unblinded outcome data were available for analysis? | | | NI |  |
|  | 5.2 ... multiple eligible outcome measurements (e.g. scales, definitions, time points) within the outcome domain? | | | NI |  |
|  | 5.3 ... multiple eligible analyses of the data? |  |  | NI |  |
|  | **Risk of bias judgement** |  |  | **Low** | This study conducted a secondary analysis of the dependent variables based on individual original data. |
| **Overall bias** | **Risk of bias judgement** |  |  | **Some concerns** |  |
|  |  |  |  |  |  |
|  |  |  |  |  |  |
| **Unique ID** | 23 | **Study ID** | 13 | **Assessor** | Bai |
| **Ref or Label** |  | **Aim** | assignment to intervention (the 'intention-to-treat' effect) | |  |
| **Experimental** | Inoculation strategies.Inoculation+Feedback | **Comparator** | Control | **Source** | Journal article(s) |
| **Outcome** | discrimination ability and discrimination criterion | **Results** |  | **Weight** | 1 |
| **Domain** | **Signalling question** |  |  | **Response** | **Comments** |
| **Bias arising from the randomization process** | 1.1 Was the allocation sequence random? |  |  | N | these last four studies were quasi-experimental as it was not possible to randomly assign participants to play the games either with or without feedback (we instead collected data across different time points). |
|  | 1.2 Was the allocation sequence concealed until participants were enrolled and assigned to interventions? | | | PY |  |
|  | 1.3 Did baseline differences between intervention groups suggest a problem with the randomization process? | | | N | Supplement D: Descriptive Statistics Experiments 1-5 |
|  | **Risk of bias judgement** |  |  | **Some concerns** |  |
| **Bias due to deviations from intended interventions** | 2.1.Were participants aware of their assigned intervention during the trial? | |  | PN | these last four studies were quasi-experimental as it was not possible to randomly assign participants to play the games either with or without feedback (we instead collected data across different time points). |
|  | 2.2.Were carers and people delivering the interventions aware of participants' assigned intervention during the trial? | | | PY |  |
|  | 2.3. If Y/PY/NI to 2.1 or 2.2: Were there deviations from the intended intervention that arose because of the experimental context? | | | NI |  |
|  | 2.4 If Y/PY to 2.3: Were these deviations likely to have affected the outcome? | |  | NA |  |
|  | 2.5. If Y/PY/NI to 2.4: Were these deviations from intended intervention balanced between groups? | | | NA |  |
|  | 2.6 Was an appropriate analysis used to estimate the effect of assignment to intervention? | | | Y | A detailed description of all excluded participants and attention checks is provided in Supplemental Material A.1  With one exception: the exclusion criterion “participant has played BadNews before” was replaced with “participant entered the incorrect Bad Newscompletion code (if in Bad News condition).”  The participants who indicated being under 18 years old were excluded as per our ethics approval. In addition, we excluded participants not from the United States. |
|  | 2.7 If N/PN/NI to 2.6: Was there potential for a substantial impact (on the result) of the failure to analyse participants in the group to which they were randomized? | | | NA |  |
|  | **Risk of bias judgement** |  |  | **Some concerns** |  |
| **Bias due to missing outcome data** | 3.1 Were data for this outcome available for all, or nearly all, participants randomized? | | | Y | In total, we collected 257 valid responses without the feedback tool and 302 valid responses with the feedback tool, for a total of N = 559 responses. |
|  | 3.2 If N/PN/NI to 3.1: Is there evidence that result was not biased by missing outcome data? | | | NA |  |
|  | 3.3 If N/PN to 3.2: Could missingness in the outcome depend on its true value? | |  | NA |  |
|  | 3.4 If Y/PY/NI to 3.3: Is it likely that missingness in the outcome depended on its true value? | | | NA |  |
|  | **Risk of bias judgement** |  |  | **Low** |  |
| **Bias in measurement of the outcome** | 4.1 Was the method of measuring the outcome inappropriate? | |  | N | The items from item sets A and B weretaken from previous research testing the efficacy of Bad News (Basol et al., 2020; Maertens et al., 2021; Roozenbeek & van der Linden, 2019). |
|  | 4.2 Could measurement or ascertainment of the outcome have differed between intervention groups? | | | N | both at the start and the end of each game, as well as a series of demographic questions. Responses from participants who gave informed consent and who completed both the pre- and postgame surveys were recorded. |
|  | 4.3 Were outcome assessors aware of the intervention received by study participants? | | | PY | Post-test after intervention, subject may know. |
|  | 4.4 If Y/PY/NI to 4.3: Could assessment of the outcome have been influenced by knowledge of intervention received? | | | N | It is self-reported by the subject, not the subject. |
|  | 4.5 If Y/PY/NI to 4.4: Is it likely that assessment of the outcome was influenced by knowledge of intervention received? | | | NA |  |
|  | **Risk of bias judgement** |  |  | **Low** |  |
| **Bias in selection of the reported result** | 5.1 Were the data that produced this result analysed in accordance with a pre-specified analysis plan that was finalized before unblinded outcome data were available for analysis? | | | NI |  |
|  | 5.2 ... multiple eligible outcome measurements (e.g. scales, definitions, time points) within the outcome domain? | | | NI |  |
|  | 5.3 ... multiple eligible analyses of the data? |  |  | NI |  |
|  | **Risk of bias judgement** |  |  | **Low** | This study conducted a secondary analysis of the dependent variables based on individual original data. |
| **Overall bias** | **Risk of bias judgement** |  |  | **Some concerns** |  |
|  |  |  |  |  |  |
|  |  |  |  |  |  |
| **Unique ID** | 24 | **Study ID** | 13 | **Assessor** | Bai |
| **Ref or Label** |  | **Aim** | assignment to intervention (the 'intention-to-treat' effect) | |  |
| **Experimental** | Inoculation strategies.Inoculation+Feedback | **Comparator** | Control | **Source** | Journal article(s) |
| **Outcome** | discrimination ability and discrimination criterion | **Results** |  | **Weight** | 1 |
| **Domain** | **Signalling question** |  |  | **Response** | **Comments** |
| **Bias arising from the randomization process** | 1.1 Was the allocation sequence random? |  |  | N | these last four studies were quasi-experimental as it was not possible to randomly assign participants to play the games either with or without feedback (we instead collected data across different time points). |
|  | 1.2 Was the allocation sequence concealed until participants were enrolled and assigned to interventions? | | | PY |  |
|  | 1.3 Did baseline differences between intervention groups suggest a problem with the randomization process? | | | N | Supplement D: Descriptive Statistics Experiments 1-5 |
|  | **Risk of bias judgement** |  |  | **Some concerns** |  |
| **Bias due to deviations from intended interventions** | 2.1.Were participants aware of their assigned intervention during the trial? | |  | PN | these last four studies were quasi-experimental as it was not possible to randomly assign participants to play the games either with or without feedback (we instead collected data across different time points). |
|  | 2.2.Were carers and people delivering the interventions aware of participants' assigned intervention during the trial? | | | PY |  |
|  | 2.3. If Y/PY/NI to 2.1 or 2.2: Were there deviations from the intended intervention that arose because of the experimental context? | | | NI |  |
|  | 2.4 If Y/PY to 2.3: Were these deviations likely to have affected the outcome? | |  | NA |  |
|  | 2.5. If Y/PY/NI to 2.4: Were these deviations from intended intervention balanced between groups? | | | NA |  |
|  | 2.6 Was an appropriate analysis used to estimate the effect of assignment to intervention? | | | Y | A detailed description of all excluded participants and attention checks is provided in Supplemental Material A.1  With one exception: the exclusion criterion “participant has played BadNews before” was replaced with “participant entered the incorrect Bad Newscompletion code (if in Bad News condition).”  Finally, we implemented an attention check in the game, which we used as an exclusion criterion (participants were asked what game they were currently playing). |
|  | 2.7 If N/PN/NI to 2.6: Was there potential for a substantial impact (on the result) of the failure to analyse participants in the group to which they were randomized? | | | NA |  |
|  | **Risk of bias judgement** |  |  | **Some concerns** |  |
| **Bias due to missing outcome data** | 3.1 Were data for this outcome available for all, or nearly all, participants randomized? | | | Y | In total, we collected 1,342 participants without feedback (960 valid paired pre-and postresponses, as some responses were incomplete) and 1,216 participants with feedback (930 valid paired pre- and postre-sponses), for a total sample size of 2,558 participants (1,890 valid pre- and postresponses). |
|  | 3.2 If N/PN/NI to 3.1: Is there evidence that result was not biased by missing outcome data? | | | NA |  |
|  | 3.3 If N/PN to 3.2: Could missingness in the outcome depend on its true value? | |  | NA |  |
|  | 3.4 If Y/PY/NI to 3.3: Is it likely that missingness in the outcome depended on its true value? | | | NA |  |
|  | **Risk of bias judgement** |  |  | **Low** |  |
| **Bias in measurement of the outcome** | 4.1 Was the method of measuring the outcome inappropriate? | |  | N | The items from item sets A and B weretaken from previous research testing the efficacy of Bad News (Basol et al., 2020; Maertens et al., 2021; Roozenbeek & van der Linden, 2019). |
|  | 4.2 Could measurement or ascertainment of the outcome have differed between intervention groups? | | | N | both at the start and the end of each game, as well as a series of demographic questions. Responses from participants who gave informed consent and who completed both the pre- and postgame surveys were recorded. |
|  | 4.3 Were outcome assessors aware of the intervention received by study participants? | | | PY | Post-test after intervention, subject may know. |
|  | 4.4 If Y/PY/NI to 4.3: Could assessment of the outcome have been influenced by knowledge of intervention received? | | | N | It is self-reported by the subject, not the subject. |
|  | 4.5 If Y/PY/NI to 4.4: Is it likely that assessment of the outcome was influenced by knowledge of intervention received? | | | NA |  |
|  | **Risk of bias judgement** |  |  | **Low** |  |
| **Bias in selection of the reported result** | 5.1 Were the data that produced this result analysed in accordance with a pre-specified analysis plan that was finalized before unblinded outcome data were available for analysis? | | | NI |  |
|  | 5.2 ... multiple eligible outcome measurements (e.g. scales, definitions, time points) within the outcome domain? | | | NI |  |
|  | 5.3 ... multiple eligible analyses of the data? |  |  | NI |  |
|  | **Risk of bias judgement** |  |  | **Low** | This study conducted a secondary analysis of the dependent variables based on individual original data. |
| **Overall bias** | **Risk of bias judgement** |  |  | **Some concerns** |  |
|  |  |  |  |  |  |
|  |  |  |  |  |  |
| **Unique ID** | 25 | **Study ID** | 14 | **Assessor** | Bai |
| **Ref or Label** |  | **Aim** | assignment to intervention (the 'intention-to-treat' effect) | |  |
| **Experimental** | Bias awareness | **Comparator** | Control | **Source** | Journal article(s) |
| **Outcome** | discrimination ability and discrimination criterion | **Results** |  | **Weight** | 1 |
| **Domain** | **Signalling question** |  |  | **Response** | **Comments** |
| **Bias arising from the randomization process** | 1.1 Was the allocation sequence random? |  |  | Y | Participants were randomized into one of three treatment groups or a control group without intervention.  The intervention was made using Datasketch, a Colombian firm similar to Qualtrics. |
|  | 1.2 Was the allocation sequence concealed until participants were enrolled and assigned to interventions? | | | PY |  |
|  | 1.3 Did baseline differences between intervention groups suggest a problem with the randomization process? | | | NI |  |
|  | **Risk of bias judgement** |  |  | **Low** |  |
| **Bias due to deviations from intended interventions** | 2.1.Were participants aware of their assigned intervention during the trial? | |  | PN | The intervention was made using Datasketch, a Colombian firm similar to Qualtrics. |
|  | 2.2.Were carers and people delivering the interventions aware of participants' assigned intervention during the trial? | | | PN |  |
|  | 2.3. If Y/PY/NI to 2.1 or 2.2: Were there deviations from the intended intervention that arose because of the experimental context? | | | NA |  |
|  | 2.4 If Y/PY to 2.3: Were these deviations likely to have affected the outcome? | |  | NA |  |
|  | 2.5. If Y/PY/NI to 2.4: Were these deviations from intended intervention balanced between groups? | | | NA |  |
|  | 2.6 Was an appropriate analysis used to estimate the effect of assignment to intervention? | | | Y | One reason we might observe the same individual appearing multiple times in the survey is that participants could share their unique links with family or friends. |
|  | 2.7 If N/PN/NI to 2.6: Was there potential for a substantial impact (on the result) of the failure to analyse participants in the group to which they were randomized? | | | NA |  |
|  | **Risk of bias judgement** |  |  | **Low** |  |
| **Bias due to missing outcome data** | 3.1 Were data for this outcome available for all, or nearly all, participants randomized? | | | Y | In total, 3,297 individuals completed our online framed field ex-periment. However, our final sample is composed of 2,235 individ-uals after eliminating duplicates based on identifiers built upon national identification numbers and surnames.  Of those remaining, 645 individu-als are in the control group, 750 are treated with the personality test only, 408 are treated with the video only, and 432 are treated with both the personality test and the video. |
|  | 3.2 If N/PN/NI to 3.1: Is there evidence that result was not biased by missing outcome data? | | | NA |  |
|  | 3.3 If N/PN to 3.2: Could missingness in the outcome depend on its true value? | |  | NA |  |
|  | 3.4 If Y/PY/NI to 3.3: Is it likely that missingness in the outcome depended on its true value? | | | NA |  |
|  | **Risk of bias judgement** |  |  | **Low** |  |
| **Bias in measurement of the outcome** | 4.1 Was the method of measuring the outcome inappropriate? | |  | N | These headlines are curated from articles reviewed by fact-checking platforms such as ColombiaCheck or El Detector, affiliated with the national news outlet La Silla Vacía, ensuring the reliability of their truthful-ness. |
|  | 4.2 Could measurement or ascertainment of the outcome have differed between intervention groups? | | | N | To elicit misinformation vulnerability, participants are presented with 19 distinct news headlines in random order and are prompted to determine their reliability as in |
|  | 4.3 Were outcome assessors aware of the intervention received by study participants? | | | PN | The intervention was made using Datasketch, a Colombian firm similar to Qualtrics. |
|  | 4.4 If Y/PY/NI to 4.3: Could assessment of the outcome have been influenced by knowledge of intervention received? | | | NA |  |
|  | 4.5 If Y/PY/NI to 4.4: Is it likely that assessment of the outcome was influenced by knowledge of intervention received? | | | NA |  |
|  | **Risk of bias judgement** |  |  | **Low** |  |
| **Bias in selection of the reported result** | 5.1 Were the data that produced this result analysed in accordance with a pre-specified analysis plan that was finalized before unblinded outcome data were available for analysis? | | | NI |  |
|  | 5.2 ... multiple eligible outcome measurements (e.g. scales, definitions, time points) within the outcome domain? | | | NI |  |
|  | 5.3 ... multiple eligible analyses of the data? |  |  | NI |  |
|  | **Risk of bias judgement** |  |  | **Low** | This study conducted a secondary analysis of the dependent variables based on individual original data. |
| **Overall bias** | **Risk of bias judgement** |  |  | **Low** |  |
|  |  |  |  |  |  |
|  |  |  |  |  |  |
| **Unique ID** | 26 | **Study ID** | 15 | **Assessor** | Bai |
| **Ref or Label** |  | **Aim** | assignment to intervention (the 'intention-to-treat' effect) | |  |
| **Experimental** | Inoculation strategies | **Comparator** | Control | **Source** | Journal article(s) |
| **Outcome** | discrimination ability and discrimination criterion | **Results** |  | **Weight** | 1 |
| **Domain** | **Signalling question** |  |  | **Response** | **Comments** |
| **Bias arising from the randomization process** | 1.1 Was the allocation sequence random? |  |  | Y | One possible reason for this could be that, despite random assignment to the experi-mental conditions, the participants who played CBN differed in age and education from those who played Tetris. |
|  | 1.2 Was the allocation sequence concealed until participants were enrolled and assigned to interventions? | | | PY |  |
|  | 1.3 Did baseline differences between intervention groups suggest a problem with the randomization process? | | | PY | One possible reason for this could be that, despite random assignment to the experi-mental conditions, the participants who played CBN differed in age and education from those who played Tetris. |
|  | **Risk of bias judgement** |  |  | **Some concerns** |  |
| **Bias due to deviations from intended interventions** | 2.1.Were participants aware of their assigned intervention during the trial? | |  | PN | The study was conducted online, via Poland's research panel Ariadna. |
|  | 2.2.Were carers and people delivering the interventions aware of participants' assigned intervention during the trial? | | | PN |  |
|  | 2.3. If Y/PY/NI to 2.1 or 2.2: Were there deviations from the intended intervention that arose because of the experimental context? | | | NA |  |
|  | 2.4 If Y/PY to 2.3: Were these deviations likely to have affected the outcome? | |  | NA |  |
|  | 2.5. If Y/PY/NI to 2.4: Were these deviations from intended intervention balanced between groups? | | | NA |  |
|  | 2.6 Was an appropriate analysis used to estimate the effect of assignment to intervention? | | | PY | We excluded the data of 127 participants from the analyses, because they did not complete the second stage. The final sample consisted of 442 participants (230 women, 212 men), with an age ranging from 19 to 80 (Mage = 43.77, SDage = 15.25). |
|  | 2.7 If N/PN/NI to 2.6: Was there potential for a substantial impact (on the result) of the failure to analyse participants in the group to which they were randomized? | | | NA |  |
|  | **Risk of bias judgement** |  |  | **Low** |  |
| **Bias due to missing outcome data** | 3.1 Were data for this outcome available for all, or nearly all, participants randomized? | | | Y | We excluded the data of 127 participants from the analyses, because they did not complete the second stage. The final sample consisted of 442 participants (230 women, 212 men), with an age ranging from 19 to 80 (Mage = 43.77, SDage = 15.25). |
|  | 3.2 If N/PN/NI to 3.1: Is there evidence that result was not biased by missing outcome data? | | | NA |  |
|  | 3.3 If N/PN to 3.2: Could missingness in the outcome depend on its true value? | |  | NA |  |
|  | 3.4 If Y/PY/NI to 3.3: Is it likely that missingness in the outcome depended on its true value? | | | NA |  |
|  | **Risk of bias judgement** |  |  | **Low** |  |
| **Bias in measurement of the outcome** | 4.1 Was the method of measuring the outcome inappropriate? | |  | N | The aim of the Pilot Study was to construct a measure of believability of fake news in order to conduct the next experiments. |
|  | 4.2 Could measurement or ascertainment of the outcome have differed between intervention groups? | | | N | articipants who returned for this stage (n = 227 in the control and n = 215 in the experimental condition) were asked to re-complete the 7Cs Vaccination Readiness questionnaire and to evaluate the credibility and objectivity of ten claims about COVID-19 and vaccines (which were different than those in Stage 1). I |
|  | 4.3 Were outcome assessors aware of the intervention received by study participants? | | | PN | The study was conducted online, via Poland's research panel Ariadna. |
|  | 4.4 If Y/PY/NI to 4.3: Could assessment of the outcome have been influenced by knowledge of intervention received? | | | NA |  |
|  | 4.5 If Y/PY/NI to 4.4: Is it likely that assessment of the outcome was influenced by knowledge of intervention received? | | | NA |  |
|  | **Risk of bias judgement** |  |  | **Low** |  |
| **Bias in selection of the reported result** | 5.1 Were the data that produced this result analysed in accordance with a pre-specified analysis plan that was finalized before unblinded outcome data were available for analysis? | | | NI |  |
|  | 5.2 ... multiple eligible outcome measurements (e.g. scales, definitions, time points) within the outcome domain? | | | NI |  |
|  | 5.3 ... multiple eligible analyses of the data? |  |  | NI |  |
|  | **Risk of bias judgement** |  |  | **Low** | This study conducted a secondary analysis of the dependent variables based on individual original data. |
| **Overall bias** | **Risk of bias judgement** |  |  | **Some concerns** |  |
|  |  |  |  |  |  |
|  |  |  |  |  |  |
| **Unique ID** | 27 | **Study ID** | 15 | **Assessor** | Bai |
| **Ref or Label** |  | **Aim** | assignment to intervention (the 'intention-to-treat' effect) | |  |
| **Experimental** | Inoculation strategies | **Comparator** | Control | **Source** | Journal article(s) |
| **Outcome** | discrimination ability and discrimination criterion | **Results** |  | **Weight** | 1 |
| **Domain** | **Signalling question** |  |  | **Response** | **Comments** |
| **Bias arising from the randomization process** | 1.1 Was the allocation sequence random? |  |  | Y | One possible reason for this could be that, despite random assignment to the experi-mental conditions, the participants who played CBN differed in age and education from those who played Tetris.  The procedure of Experiment 2 was identical to that of Experiment 1. |
|  | 1.2 Was the allocation sequence concealed until participants were enrolled and assigned to interventions? | | | PY |  |
|  | 1.3 Did baseline differences between intervention groups suggest a problem with the randomization process? | | | N | The only difference was that here the assignment to the experimental conditions was random-quota, i.e., a similar number of women and men, people of the same age, and with a similar level of education was assigned to both conditions. |
|  | **Risk of bias judgement** |  |  | **Low** |  |
| **Bias due to deviations from intended interventions** | 2.1.Were participants aware of their assigned intervention during the trial? | |  | PN | The study was conducted online, via Poland's research panel Ariadna.  The procedure of Experiment 2 was identical to that of Experiment 1. |
|  | 2.2.Were carers and people delivering the interventions aware of participants' assigned intervention during the trial? | | | PN |  |
|  | 2.3. If Y/PY/NI to 2.1 or 2.2: Were there deviations from the intended intervention that arose because of the experimental context? | | | NA |  |
|  | 2.4 If Y/PY to 2.3: Were these deviations likely to have affected the outcome? | |  | NA |  |
|  | 2.5. If Y/PY/NI to 2.4: Were these deviations from intended intervention balanced between groups? | | | NA |  |
|  | 2.6 Was an appropriate analysis used to estimate the effect of assignment to intervention? | | | PY | We excluded 75 participants from the analyses, because they did not complete the second stage or some important questions in the first one. The final sample consisted of 351 participants (170 women, 181 men), with ages ranging from 18 to 79 (Mage = 45.99, SDage = 14.88). |
|  | 2.7 If N/PN/NI to 2.6: Was there potential for a substantial impact (on the result) of the failure to analyse participants in the group to which they were randomized? | | | NA |  |
|  | **Risk of bias judgement** |  |  | **Low** |  |
| **Bias due to missing outcome data** | 3.1 Were data for this outcome available for all, or nearly all, participants randomized? | | | Y | We excluded 75 participants from the analyses, because they did not complete the second stage or some important questions in the first one. The final sample consisted of 351 participants (170 women, 181 men), with ages ranging from 18 to 79 (Mage = 45.99, SDage = 14.88). |
|  | 3.2 If N/PN/NI to 3.1: Is there evidence that result was not biased by missing outcome data? | | | NA |  |
|  | 3.3 If N/PN to 3.2: Could missingness in the outcome depend on its true value? | |  | NA |  |
|  | 3.4 If Y/PY/NI to 3.3: Is it likely that missingness in the outcome depended on its true value? | | | NA |  |
|  | **Risk of bias judgement** |  |  | **Low** |  |
| **Bias in measurement of the outcome** | 4.1 Was the method of measuring the outcome inappropriate? | |  | N | The aim of the Pilot Study was to construct a measure of believability of fake news in order to conduct the next experiments. |
|  | 4.2 Could measurement or ascertainment of the outcome have differed between intervention groups? | | | N | articipants who returned for this stage (n = 227 in the control and n = 215 in the experimental condition) were asked to re-complete the 7Cs Vaccination Readiness questionnaire and to evaluate the credibility and objectivity of ten claims about COVID-19 and vaccines (which were different than those in Stage 1).  The procedure of Experiment 2 was identical to that of Experiment 1. |
|  | 4.3 Were outcome assessors aware of the intervention received by study participants? | | | PN | The study was conducted online, via Poland's research panel Ariadna.  The procedure of Experiment 2 was identical to that of Experiment 1. |
|  | 4.4 If Y/PY/NI to 4.3: Could assessment of the outcome have been influenced by knowledge of intervention received? | | | NA |  |
|  | 4.5 If Y/PY/NI to 4.4: Is it likely that assessment of the outcome was influenced by knowledge of intervention received? | | | NA |  |
|  | **Risk of bias judgement** |  |  | **Low** |  |
| **Bias in selection of the reported result** | 5.1 Were the data that produced this result analysed in accordance with a pre-specified analysis plan that was finalized before unblinded outcome data were available for analysis? | | | NI |  |
|  | 5.2 ... multiple eligible outcome measurements (e.g. scales, definitions, time points) within the outcome domain? | | | NI |  |
|  | 5.3 ... multiple eligible analyses of the data? |  |  | NI |  |
|  | **Risk of bias judgement** |  |  | **Low** | This study conducted a secondary analysis of the dependent variables based on individual original data. |
| **Overall bias** | **Risk of bias judgement** |  |  | **Low** |  |
|  |  |  |  |  |  |
|  |  |  |  |  |  |
| **Unique ID** | 28 | **Study ID** | 11 | **Assessor** | Bai |
| **Ref or Label** |  | **Aim** | assignment to intervention (the 'intention-to-treat' effect) | |  |
| **Experimental** | Media literacy | **Comparator** | Control | **Source** | Journal article(s); Statistical analysis plan (SAP) |
| **Outcome** | discrimination ability and discrimination criterion | **Results** |  | **Weight** | 1 |
| **Domain** | **Signalling question** |  |  | **Response** | **Comments** |
| **Bias arising from the randomization process** | 1.1 Was the allocation sequence random? |  |  | Y | Each participant was randomly assigned to one of six treatment conditions or a control group |
|  | 1.2 Was the allocation sequence concealed until participants were enrolled and assigned to interventions? | | | PY |  |
|  | 1.3 Did baseline differences between intervention groups suggest a problem with the randomization process? | | | N | B.5.1 Demographic Comparisons between Compliers and Non-Compliers t-test Results |
|  | **Risk of bias judgement** |  |  | **Low** |  |
| **Bias due to deviations from intended interventions** | 2.1.Were participants aware of their assigned intervention during the trial? | |  | PN | Each participant was randomly assigned to one of six treatment conditions or a control group.  The researchers had to know what group the subjects were in before they could intervene. |
|  | 2.2.Were carers and people delivering the interventions aware of participants' assigned intervention during the trial? | | | PY |  |
|  | 2.3. If Y/PY/NI to 2.1 or 2.2: Were there deviations from the intended intervention that arose because of the experimental context? | | | NI |  |
|  | 2.4 If Y/PY to 2.3: Were these deviations likely to have affected the outcome? | |  | NA |  |
|  | 2.5. If Y/PY/NI to 2.4: Were these deviations from intended intervention balanced between groups? | | | NA |  |
|  | 2.6 Was an appropriate analysis used to estimate the effect of assignment to intervention? | | | Y | To make sure any observed treatment effects are due to our manipulations, we present participants with a statement depending on the treatment they were assigned to. |
|  | 2.7 If N/PN/NI to 2.6: Was there potential for a substantial impact (on the result) of the failure to analyse participants in the group to which they were randomized? | | | NA |  |
|  | **Risk of bias judgement** |  |  | **Some concerns** |  |
| **Bias due to missing outcome data** | 3.1 Were data for this outcome available for all, or nearly all, participants randomized? | | | NI |  |
|  | 3.2 If N/PN/NI to 3.1: Is there evidence that result was not biased by missing outcome data? | | | Y | Figure B28: Supplementary Table 1: US Compliers and Non-Compliers t-test Results. |
|  | 3.3 If N/PN to 3.2: Could missingness in the outcome depend on its true value? | |  | NA |  |
|  | 3.4 If Y/PY/NI to 3.3: Is it likely that missingness in the outcome depended on its true value? | | | NA |  |
|  | **Risk of bias judgement** |  |  | **Low** |  |
| **Bias in measurement of the outcome** | 4.1 Was the method of measuring the outcome inappropriate? | |  | N | The false statements were self-fabricated (that is, made up), and both the true and the false state-ments were selected from a pre-tested pool of claims |
|  | 4.2 Could measurement or ascertainment of the outcome have differed between intervention groups? | | | PN | After exposure to treatment, the participants were redirected to the questionnaire measuring the core outcomes (Supplementary Section B.2) |
|  | 4.3 Were outcome assessors aware of the intervention received by study participants? | | | PY | Post-test after intervention, subject may know. |
|  | 4.4 If Y/PY/NI to 4.3: Could assessment of the outcome have been influenced by knowledge of intervention received? | | | N | It is self-reported by the subject, not the subject. |
|  | 4.5 If Y/PY/NI to 4.4: Is it likely that assessment of the outcome was influenced by knowledge of intervention received? | | | NA |  |
|  | **Risk of bias judgement** |  |  | **Low** |  |
| **Bias in selection of the reported result** | 5.1 Were the data that produced this result analysed in accordance with a pre-specified analysis plan that was finalized before unblinded outcome data were available for analysis? | | | NI |  |
|  | 5.2 ... multiple eligible outcome measurements (e.g. scales, definitions, time points) within the outcome domain? | | | NI |  |
|  | 5.3 ... multiple eligible analyses of the data? |  |  | NI |  |
|  | **Risk of bias judgement** |  |  | **Low** | This study conducted a secondary analysis of the dependent variables based on individual original data. |
| **Overall bias** | **Risk of bias judgement** |  |  | **Some concerns** |  |
|  |  |  |  |  |  |
|  |  |  |  |  |  |
| **Unique ID** | 29 | **Study ID** | 13 | **Assessor** | Bai |
| **Ref or Label** |  | **Aim** | assignment to intervention (the 'intention-to-treat' effect) | |  |
| **Experimental** | Inoculation strategies.Inoculation+Feedback | **Comparator** | Control | **Source** | Journal article(s) |
| **Outcome** | discrimination ability and discrimination criterion | **Results** |  | **Weight** | 1 |
| **Domain** | **Signalling question** |  |  | **Response** | **Comments** |
| **Bias arising from the randomization process** | 1.1 Was the allocation sequence random? |  |  | Y | Participants were randomly assigned to either a control (BadNews only) or a feedback (Bad News + feedback) group. |
|  | 1.2 Was the allocation sequence concealed until participants were enrolled and assigned to interventions? | | | PY |  |
|  | 1.3 Did baseline differences between intervention groups suggest a problem with the randomization process? | | | N | Supplement D: Descriptive Statistics Experiments 1-5 |
|  | **Risk of bias judgement** |  |  | **Low** |  |
| **Bias due to deviations from intended interventions** | 2.1.Were participants aware of their assigned intervention during the trial? | |  | PN | Participants were randomly assigned to either a control (BadNews only) or a feedback (Bad News + feedback) group.  The researchers had to know what group the subjects were in before they could intervene. |
|  | 2.2.Were carers and people delivering the interventions aware of participants' assigned intervention during the trial? | | | PY |  |
|  | 2.3. If Y/PY/NI to 2.1 or 2.2: Were there deviations from the intended intervention that arose because of the experimental context? | | | NI |  |
|  | 2.4 If Y/PY to 2.3: Were these deviations likely to have affected the outcome? | |  | NA |  |
|  | 2.5. If Y/PY/NI to 2.4: Were these deviations from intended intervention balanced between groups? | | | NA |  |
|  | 2.6 Was an appropriate analysis used to estimate the effect of assignment to intervention? | | | Y | A detailed description of all excluded participants and attention checks is provided in Supplemental Material A.1 |
|  | 2.7 If N/PN/NI to 2.6: Was there potential for a substantial impact (on the result) of the failure to analyse participants in the group to which they were randomized? | | | NA |  |
|  | **Risk of bias judgement** |  |  | **Some concerns** |  |
| **Bias due to missing outcome data** | 3.1 Were data for this outcome available for all, or nearly all, participants randomized? | | | Y | The final sample consisted of 169 participants at T1 (i.e., immediately after completing Bad News). One week later at T2, a total of 152 participants completed the follow-up study (attrition rate: 11%). |
|  | 3.2 If N/PN/NI to 3.1: Is there evidence that result was not biased by missing outcome data? | | | NA |  |
|  | 3.3 If N/PN to 3.2: Could missingness in the outcome depend on its true value? | |  | NA |  |
|  | 3.4 If Y/PY/NI to 3.3: Is it likely that missingness in the outcome depended on its true value? | | | NA |  |
|  | **Risk of bias judgement** |  |  | **Low** |  |
| **Bias in measurement of the outcome** | 4.1 Was the method of measuring the outcome inappropriate? | |  | N | The items from item sets A and B weretaken from previous research testing the efficacy of Bad News (Basol et al., 2020; Maertens et al., 2021; Roozenbeek & van der Linden, 2019). |
|  | 4.2 Could measurement or ascertainment of the outcome have differed between intervention groups? | | | N | All participants were asked at three time points (T0, preintervention; T1, immediately postintervention; and T2, 7 days postintervention) to rate the reliability of a series of news items (in the form of Twitter posts). |
|  | 4.3 Were outcome assessors aware of the intervention received by study participants? | | | PY | Post-test after intervention, subject may know. |
|  | 4.4 If Y/PY/NI to 4.3: Could assessment of the outcome have been influenced by knowledge of intervention received? | | | N | It is self-reported by the subject, not the subject. |
|  | 4.5 If Y/PY/NI to 4.4: Is it likely that assessment of the outcome was influenced by knowledge of intervention received? | | | NA |  |
|  | **Risk of bias judgement** |  |  | **Low** |  |
| **Bias in selection of the reported result** | 5.1 Were the data that produced this result analysed in accordance with a pre-specified analysis plan that was finalized before unblinded outcome data were available for analysis? | | | NI |  |
|  | 5.2 ... multiple eligible outcome measurements (e.g. scales, definitions, time points) within the outcome domain? | | | NI |  |
|  | 5.3 ... multiple eligible analyses of the data? |  |  | NI |  |
|  | **Risk of bias judgement** |  |  | **Low** | This study conducted a secondary analysis of the dependent variables based on individual original data. |
| **Overall bias** | **Risk of bias judgement** |  |  | **Some concerns** |  |
|  |  |  |  |  |  |
|  |  |  |  |  |  |
| **Unique ID** | 30 | **Study ID** | 13 | **Assessor** | Bai |
| **Ref or Label** |  | **Aim** | assignment to intervention (the 'intention-to-treat' effect) | |  |
| **Experimental** | Inoculation strategies.Inoculation+Feedback | **Comparator** | Control | **Source** | Journal article(s) |
| **Outcome** | discrimination ability and discrimination criterion | **Results** |  | **Weight** | 1 |
| **Domain** | **Signalling question** |  |  | **Response** | **Comments** |
| **Bias arising from the randomization process** | 1.1 Was the allocation sequence random? |  |  | Y | Participants were randomly assigned to either a control (BadNews only) or a feedback (Bad News + feedback) group.  the study design, measures, deviations from the preregistration, and exclusion criteria were the same as in Experiment 1. |
|  | 1.2 Was the allocation sequence concealed until participants were enrolled and assigned to interventions? | | | PY |  |
|  | 1.3 Did baseline differences between intervention groups suggest a problem with the randomization process? | | | N | Supplement D: Descriptive Statistics Experiments 1-5 |
|  | **Risk of bias judgement** |  |  | **Low** |  |
| **Bias due to deviations from intended interventions** | 2.1.Were participants aware of their assigned intervention during the trial? | |  | PN | Participants were randomly assigned to either a control (BadNews only) or a feedback (Bad News + feedback) group.  The researchers had to know what group the subjects were in before they could intervene.  the study design, measures, deviations from the preregistration, and exclusion criteria were the same as in Experiment 1.  In Experiment 2 (preregistration: https://aspredicted.org/SDW_TG7), we administered three separate treatment conditions: feedback only, feedback with manipulation technique choice, and feedback with polarization. |
|  | 2.2.Were carers and people delivering the interventions aware of participants' assigned intervention during the trial? | | | PY |  |
|  | 2.3. If Y/PY/NI to 2.1 or 2.2: Were there deviations from the intended intervention that arose because of the experimental context? | | | NI |  |
|  | 2.4 If Y/PY to 2.3: Were these deviations likely to have affected the outcome? | |  | NA |  |
|  | 2.5. If Y/PY/NI to 2.4: Were these deviations from intended intervention balanced between groups? | | | NA |  |
|  | 2.6 Was an appropriate analysis used to estimate the effect of assignment to intervention? | | | Y | A detailed description of all excluded participants and attention checks is provided in Supplemental Material A.1  With one exception: the exclusion criterion “participant has played BadNews before” was replaced with “participant entered the incorrect Bad Newscompletion code (if in Bad News condition).” |
|  | 2.7 If N/PN/NI to 2.6: Was there potential for a substantial impact (on the result) of the failure to analyse participants in the group to which they were randomized? | | | NA |  |
|  | **Risk of bias judgement** |  |  | **Some concerns** |  |
| **Bias due to missing outcome data** | 3.1 Were data for this outcome available for all, or nearly all, participants randomized? | | | Y | Taking into account a potential attrition of 20%, we sampled 350 participants at T0. The sample consisted of U.K.  In total, 312 participants completed Part 1 and Part 2, that is, a slight oversampling. Of these 65.7% were female, 33.7% were male, and 0.6% categorized themselves as “other.” |
|  | 3.2 If N/PN/NI to 3.1: Is there evidence that result was not biased by missing outcome data? | | | NA |  |
|  | 3.3 If N/PN to 3.2: Could missingness in the outcome depend on its true value? | |  | NA |  |
|  | 3.4 If Y/PY/NI to 3.3: Is it likely that missingness in the outcome depended on its true value? | | | NA |  |
|  | **Risk of bias judgement** |  |  | **Low** |  |
| **Bias in measurement of the outcome** | 4.1 Was the method of measuring the outcome inappropriate? | |  | N | The items from item sets A and B weretaken from previous research testing the efficacy of Bad News (Basol et al., 2020; Maertens et al., 2021; Roozenbeek & van der Linden, 2019). |
|  | 4.2 Could measurement or ascertainment of the outcome have differed between intervention groups? | | | N | All participants were asked at three time points (T0, preintervention; T1, immediately postintervention; and T2, 7 days postintervention) to rate the reliability of a series of news items (in the form of Twitter posts). |
|  | 4.3 Were outcome assessors aware of the intervention received by study participants? | | | PY | Post-test after intervention, subject may know. |
|  | 4.4 If Y/PY/NI to 4.3: Could assessment of the outcome have been influenced by knowledge of intervention received? | | | N | It is self-reported by the subject, not the subject. |
|  | 4.5 If Y/PY/NI to 4.4: Is it likely that assessment of the outcome was influenced by knowledge of intervention received? | | | NA |  |
|  | **Risk of bias judgement** |  |  | **Low** |  |
| **Bias in selection of the reported result** | 5.1 Were the data that produced this result analysed in accordance with a pre-specified analysis plan that was finalized before unblinded outcome data were available for analysis? | | | NI |  |
|  | 5.2 ... multiple eligible outcome measurements (e.g. scales, definitions, time points) within the outcome domain? | | | NI |  |
|  | 5.3 ... multiple eligible analyses of the data? |  |  | NI |  |
|  | **Risk of bias judgement** |  |  | **Low** | This study conducted a secondary analysis of the dependent variables based on individual original data. |
| **Overall bias** | **Risk of bias judgement** |  |  | **Some concerns** |  |

**Table S6. Parameter Details and Model Fit Results**

| **Models** | **Parameters** | **Data Points** | **Discrimination ability** | | | **Discrimination criterion** | | |
| --- | --- | --- | --- | --- | --- | --- | --- | --- |
| **Residual Deviance** | **pD** | **DIC** | **Residual Deviance** | **pD** | **DIC** |
| Preliminary Analysis | trt_effects = "random",  prior_trt = normal(location = 0, scale = 1),  prior_intercept = normal(location = 0, scale = 1),  prior_reg = normal(location = 0, scale = 1),  prior_het = normal(scale = 5),  prior_aux = normal(scale = 5),  adapt_delta = 0.99,  link = "identity",  likelihood = "normal",  chains = 4,  iter = 2000,  cores = 64 | 19260 | 19216.4 | 18.9 | 19235.2 | 19213.8 | -107.6 | 19106.3 |
| Preliminary Analysis-ume | trt_effects = "random",  prior_trt = normal(location = 0, scale = 1),  prior_intercept = normal(location = 0, scale = 1),  prior_reg = normal(location = 0, scale = 1),  prior_het = normal(scale = 5),  prior_aux = normal(scale = 5),  adapt_delta = 0.99,  link = "identity",  likelihood = "normal",  consistency = "ume",  chains = 4,  iter = 2000,  cores = 64 | 19260 | 19216.4 | 18.9 | 19235.2 | 19213.8 | -107.6 | 19106.3 |
| Preliminary Analysis - nodesplit | trt_effects = "random",  prior_trt = normal(location = 0, scale = 1),  prior_intercept = normal(location = 0, scale = 1),  prior_reg = normal(location = 0, scale = 1),  prior_het = normal(scale = 5),  prior_aux = normal(scale = 5),  adapt_delta = 0.99,  link = "identity",  likelihood = "normal",  consistency = "nodesplit",  chains = 4,  iter = 2000,  cores = 64 | 19260 | 19213.6 | 18.9 | 19232.5 | 19213.7 | -108.4 | 19105.3 |
|  | Bayesian *p* = 0.96 | | | Bayesian *p* = 0.76 | | |
| Further Analysis | trt_effects = "random",  regression = ~ .trt *(gender + age+ CRT + education + region + topics + image + social media indicators + consistency + number + likert),  prior_trt = normal(location = 0, scale = 1),  prior_intercept = normal(location = 0, scale = 1),  prior_reg = normal(location = 0, scale = 1),  prior_het = normal(scale = 5),  prior_aux = normal(scale = 5),  dapt_delta = 0.99,  control = list(max_treedepth = 15),  link = "identity",  likelihood = "normal",  chains = 4,  iter = 2000,  cores = 64 | 19260 | 19211.0 | 81.2 | 19292.2 | 19215.4 | -5.2 | 19210.2 |
| Further Analysis - nodesplit | trt_effects = "random",  regression = ~ .trt *(gender + age+ CRT + education + region + topics + image + social media indicators + consistency + number + likert),  prior_trt = normal (location = 0, scale = 1),  prior_intercept = normal(location = 0, scale = 1),  prior_reg = normal(location = 0, scale = 1),  prior_het = normal(scale = 5),  prior_aux = normal(scale = 5),  dapt_delta = 0.99,  control = list(max_treedepth = 15),  link = "identity",  likelihood = "normal",  consistency = "nodesplit",  chains = 4,  iter = 2000,  cores = 64 | 19260 | 19214.2 | 82.6 | 19296.8 | 19213.5 | -2 | 19211.5 |
|  | Bayesian *p* = 0.73 | | | Bayesian *p* = 0.63 | | |
| Extended Analysis | trt_effects = "random",  regression = ~ .trt * phase,  prior_trt = normal(location = 0, scale = 1),  prior_intercept = normal(location = 0, scale = 1),  prior_reg = normal(location = 0, scale = 1),  prior_het = normal(scale = 5),  prior_aux = normal(scale = 5),  control = list(max_treedepth = 15),  adapt_delta = 0.99,  link = "identity",  likelihood = "normal",  chains = 4,  iter = 2000,  cores = 64 | 30530 | 30470.1 | -43.1 | 30427 | 30469.8 | -146.9 | 30322.9 |
| Extended Analysis- nodesplit | trt_effects = "random",  regression = ~ .trt * phase,  prior_trt = normal(location = 0, scale = 1),  prior_intercept = normal(location = 0, scale = 1),  prior_reg = normal(location = 0, scale = 1),  prior_het = normal(scale = 5),  prior_aux = normal(scale = 5),  control = list(max_treedepth = 15),  adapt_delta = 0.99,  link = "identity",  likelihood = "normal",  consistency = "nodesplit",  chains = 4,  iter = 2000,  cores = 64 | 30530 | 30470 | -37.7 | 30432.3 | 30468 | -141.6 | 30326.5 |
|  | Bayesian *p* = 0.96 | | | Bayesian *p* = 0.73 | | |
| Sensitivity Analysis | trt_effects = "random",  regression = ~ .trt *(gender + age+ CRT + education + region + topics + image + consistency + number),  prior_trt = normal(location = 0, scale = 1),  prior_intercept = normal(location = 0, scale = 1),  prior_reg = normal(location = 0, scale = 1),  prior_het = normal(scale = 5),  prior_aux = normal(scale = 5),  dapt_delta = 0.99,  control = list(max_treedepth = 15),  link = "identity",  likelihood = "normal",  chains = 4,  iter = 2000,  cores = 64 | 12331 | 12313.5 | 24.1 | 12337.6 | 12313.3 | -3.4 | 12310 |

**Note.** In further analysis and extended analysis, the UME method is not applicable for testing model inconsistency. In the sensitivity analysis, the factors Likert (only having even levels) and Social media indicators (only having the "no" level) were removed. Additionally, node-split regression was not included in the sensitivity analysis because no factors in local inconsistency had two or more levels.

**Complete Results of Study**

**Table S7. Preliminary outcomes**

| Variable a | Discrimination ability | | | | Discrimination criterion | | | |
| --- | --- | --- | --- | --- | --- | --- | --- | --- |
| MD | SD | lowerCrI | upperCrI | MD | SD | lowerCrI | upperCrI |
| Accuracy prompts | 0.044 | 0.075 | -0.101 | 0.203 | 0.002 | 0.043 | -0.091 | 0.086 |
| Bias awareness | 0.021 | 0.094 | -0.180 | 0.211 | 0.037 | 0.145 | -0.253 | 0.319 |
| Feedback | 0.145 | 0.182 | -0.206 | 0.514 | 0.208 | 0.156 | -0.085 | 0.525 |
| Financial incentives | 0.199 | 0.057 | 0.089 | 0.314 | -0.017 | 0.036 | -0.091 | 0.053 |
| Inoculation strategies | 0.002 | 0.067 | -0.127 | 0.144 | 0.104 | 0.052 | 0.008 | 0.212 |
| Media literacy | 0.078 | 0.041 | -0.002 | 0.161 | 0.106 | 0.027 | 0.049 | 0.157 |
| Writing letters to elders | 0.050 | 0.071 | -0.091 | 0.198 | 0.106 | 0.046 | 0.016 | 0.201 |
| tau | 0.086 | 0.037 | 0.020 | 0.169 | 0.044 | 0.027 | 0.004 | 0.107 |

注：a VS Contorl

**Table S8. Further outcomes**

| Variable | | Discrimination ability | | | | Discrimination criterion | | | |
| --- | --- | --- | --- | --- | --- | --- | --- | --- | --- |
| MD | SD | lowerCrI | upperCrI | MD | SD | lowerCrI | upperCrI |
| Gendera | Male | 0.082 | 0.016 | 0.050 | 0.113 | 0.034 | 0.014 | 0.006 | 0.062 |
|  | Other | 0.100 | 0.070 | -0.035 | 0.239 | -0.012 | 0.073 | -0.154 | 0.131 |
|  | Prefer not to say | 0.402 | 0.370 | -0.321 | 1.113 | 0.592 | 0.365 | -0.107 | 1.296 |
| Ageb | Under 18 | 0.007 | 0.070 | -0.133 | 0.144 | -0.073 | 0.070 | -0.210 | 0.062 |
|  | 30-49 | 0.017 | 0.020 | -0.021 | 0.057 | 0.022 | 0.020 | -0.017 | 0.060 |
|  | Over 50 | 0.093 | 0.024 | 0.046 | 0.140 | 0.124 | 0.022 | 0.081 | 0.166 |
| Educationc | Some college/university | 0.102 | 0.024 | 0.054 | 0.148 | 0.096 | 0.022 | 0.051 | 0.139 |
|  | Higher degree | 0.149 | 0.024 | 0.101 | 0.196 | 0.102 | 0.021 | 0.062 | 0.145 |
| CRT |  | 0.397 | 0.027 | 0.345 | 0.449 | 0.314 | 0.024 | 0.266 | 0.361 |
| Regiond | Antarctica | 0.035 | 0.726 | -1.345 | 1.478 | 0.655 | 0.874 | -1.077 | 2.307 |
|  | Asia | -0.069 | 0.059 | -0.182 | 0.049 | -0.135 | 0.058 | -0.248 | -0.023 |
|  | Europe | 0.063 | 0.067 | -0.067 | 0.196 | 0.199 | 0.064 | 0.072 | 0.331 |
|  | North America | 0.033 | 0.064 | -0.094 | 0.158 | 0.117 | 0.063 | -0.006 | 0.240 |
|  | Oceania | 0.049 | 0.069 | -0.084 | 0.187 | 0.140 | 0.067 | 0.006 | 0.273 |
|  | Other | 0.097 | 0.587 | -1.066 | 1.236 | 0.024 | 0.551 | -1.046 | 1.118 |
|  | South America | -0.066 | 0.092 | -0.246 | 0.115 | 0.020 | 0.194 | -0.363 | 0.397 |
| Topicse | Health | 0.309 | 0.667 | -1.022 | 1.608 | 0.048 | 0.663 | -1.250 | 1.352 |
|  | Politics | 0.014 | 0.461 | -0.878 | 0.934 | 0.004 | 0.464 | -0.911 | 0.908 |
|  | No special theme | 0.196 | 0.439 | -0.661 | 1.069 | 0.037 | 0.445 | -0.851 | 0.886 |
| imagef | Yes | 0.103 | 0.483 | -0.841 | 1.046 | 0.287 | 0.492 | -0.681 | 1.250 |
|  | Partially Yes | -0.170 | 0.787 | -1.716 | 1.371 | -0.076 | 0.766 | -1.542 | 1.447 |
| Social media indicatorsg | Yes | 0.108 | 0.637 | -1.158 | 1.314 | -0.020 | 0.653 | -1.312 | 1.237 |
| consistencyh | Yes | -0.011 | 0.655 | -1.337 | 1.310 | 0.225 | 0.669 | -1.081 | 1.542 |
|  | Partially consistent | 0.104 | 0.803 | -1.529 | 1.657 | -0.115 | 0.762 | -1.550 | 1.417 |
|  | Not involved | 0.326 | 0.386 | -0.436 | 1.087 | 0.033 | 0.380 | -0.705 | 0.778 |
| numberi | Yes | 0.097 | 0.454 | -0.793 | 0.953 | 0.027 | 0.449 | -0.873 | 0.885 |
| likertj | odd | 0.024 | 0.452 | -0.869 | 0.943 | -0.025 | 0.463 | -0.927 | 0.882 |
| Vs control |  |  |  |  |  |  |  |  |  |
| Gendera | Accuracy prompts:Male | -0.012 | 0.045 | -0.101 | 0.078 | 0.040 | 0.036 | -0.029 | 0.110 |
|  | Bias awareness:Male | -0.093 | 0.035 | -0.163 | -0.026 | -0.186 | 0.142 | -0.461 | 0.090 |
|  | Feedback:Male | -0.499 | 0.208 | -0.914 | -0.092 | -0.364 | 0.172 | -0.698 | -0.020 |
|  | Financial incentives:Male | -0.112 | 0.052 | -0.216 | -0.010 | -0.100 | 0.039 | -0.177 | -0.023 |
|  | Inoculation strategies:Male | -0.065 | 0.062 | -0.180 | 0.058 | -0.099 | 0.061 | -0.217 | 0.022 |
|  | Media literacy:Male | 0.019 | 0.028 | -0.037 | 0.074 | -0.023 | 0.024 | -0.070 | 0.026 |
|  | Writing letters to elders:Male | 0.108 | 0.044 | 0.025 | 0.196 | 0.031 | 0.039 | -0.046 | 0.107 |
|  | Accuracy prompts:Other | 0.265 | 0.273 | -0.278 | 0.797 | 0.281 | 0.218 | -0.154 | 0.709 |
|  | Bias awareness:Other | -0.277 | 0.109 | -0.493 | -0.064 | -0.462 | 0.367 | -1.166 | 0.251 |
|  | Feedback:Other | 0.120 | 0.636 | -1.134 | 1.369 | -0.259 | 0.563 | -1.380 | 0.857 |
|  | Financial incentives:Other | 0.179 | 0.196 | -0.219 | 0.548 | 0.123 | 0.158 | -0.185 | 0.436 |
|  | Inoculation strategies:Other | -0.305 | 0.140 | -0.581 | -0.029 | -0.221 | 0.152 | -0.515 | 0.080 |
|  | Media literacy:Other | 0.611 | 0.393 | -0.166 | 1.356 | 0.418 | 0.272 | -0.112 | 0.952 |
|  | Writing letters to elders:Other | -0.057 | 0.133 | -0.320 | 0.199 | 0.202 | 0.127 | -0.053 | 0.444 |
|  | Accuracy prompts:Prefer not to say | -0.273 | 0.515 | -1.305 | 0.718 | -0.338 | 0.488 | -1.285 | 0.638 |
|  | Bias awareness:Prefer not to say | -0.026 | 0.969 | -1.976 | 1.836 | 0.034 | 1.011 | -1.919 | 1.996 |
|  | Feedback:Prefer not to say | -0.007 | 1.003 | -2.001 | 1.969 | -0.012 | 0.983 | -1.963 | 1.899 |
|  | Financial incentives:Prefer not to say | 0.007 | 1.012 | -1.962 | 1.981 | 0.023 | 1.024 | -1.964 | 2.076 |
|  | Inoculation strategies:Prefer not to say | 0.016 | 0.977 | -1.860 | 1.901 | -0.009 | 1.012 | -1.933 | 1.947 |
|  | Media literacy:Prefer not to say | 0.001 | 0.996 | -1.926 | 1.930 | 0.029 | 1.027 | -1.979 | 2.030 |
|  | Writing letters to elders:Prefer not to say | 0.003 | 0.992 | -1.908 | 1.964 | 0.021 | 1.000 | -1.942 | 1.977 |
| Ageb | Accuracy prompts:Under 18 | -0.095 | 0.172 | -0.428 | 0.251 | 0.172 | 0.154 | -0.140 | 0.474 |
|  | Bias awareness:Under 18 | 0.038 | 0.276 | -0.487 | 0.575 | 0.437 | 0.776 | -1.056 | 1.930 |
|  | Feedback:Under 18 | 0.456 | 0.643 | -0.809 | 1.690 | 0.534 | 0.567 | -0.554 | 1.626 |
|  | Financial incentives:Under 18 | 0.203 | 0.229 | -0.255 | 0.653 | -0.059 | 0.170 | -0.389 | 0.282 |
|  | Inoculation strategies:Under 18 | -0.166 | 0.166 | -0.495 | 0.158 | 0.026 | 0.200 | -0.380 | 0.420 |
|  | Media literacy:Under 18 | -0.004 | 0.169 | -0.340 | 0.335 | 0.088 | 0.140 | -0.179 | 0.369 |
|  | Writing letters to elders:Under 18 | 0.135 | 0.199 | -0.254 | 0.519 | -0.070 | 0.198 | -0.462 | 0.312 |
|  | Accuracy prompts:30-49 | 0.070 | 0.053 | -0.037 | 0.174 | -0.034 | 0.045 | -0.121 | 0.055 |
|  | Bias awareness:30-49 | 0.002 | 0.038 | -0.070 | 0.077 | 0.428 | 0.149 | 0.135 | 0.718 |
|  | Feedback:30-49 | -0.169 | 0.227 | -0.604 | 0.274 | -0.112 | 0.187 | -0.481 | 0.255 |
|  | Financial incentives:30-49 | -0.165 | 0.065 | -0.294 | -0.034 | -0.130 | 0.049 | -0.227 | -0.034 |
|  | Inoculation strategies:30-49 | -0.220 | 0.075 | -0.366 | -0.073 | -0.051 | 0.080 | -0.206 | 0.107 |
|  | Media literacy:30-49 | 0.025 | 0.035 | -0.043 | 0.094 | 0.038 | 0.032 | -0.025 | 0.101 |
|  | Writing letters to elders:30-49 | -0.023 | 1.000 | -2.005 | 1.927 | -0.005 | 1.021 | -1.994 | 1.981 |
|  | Accuracy prompts:over 50 | 0.105 | 0.063 | -0.016 | 0.228 | -0.016 | 0.053 | -0.118 | 0.088 |
|  | Bias awareness:over 50 | -0.092 | 0.060 | -0.207 | 0.027 | 0.668 | 0.258 | 0.164 | 1.181 |
|  | Feedback:over 50 | -0.361 | 0.426 | -1.196 | 0.487 | -0.523 | 0.364 | -1.229 | 0.182 |
|  | Financial incentives:over 50 | -0.329 | 0.073 | -0.471 | -0.189 | -0.294 | 0.055 | -0.400 | -0.188 |
|  | Inoculation strategies:over 50 | -0.240 | 0.087 | -0.408 | -0.067 | -0.240 | 0.087 | -0.407 | -0.067 |
|  | Media literacy:over 50 | 0.025 | 0.041 | -0.058 | 0.105 | 0.096 | 0.034 | 0.029 | 0.160 |
|  | Writing letters to elders:over 50 | 0.012 | 1.033 | -2.009 | 1.996 | -0.000 | 0.997 | -1.944 | 1.970 |
| Educationc | Accuracy prompts:Some college/university | -0.025 | 0.060 | -0.142 | 0.094 | -0.018 | 0.053 | -0.121 | 0.084 |
|  | Bias awareness:Some college/university | -0.121 | 0.042 | -0.204 | -0.037 | 0.571 | 0.172 | 0.233 | 0.911 |
|  | Feedback:Some college/university | 0.061 | 0.289 | -0.509 | 0.627 | -0.043 | 0.233 | -0.501 | 0.406 |
|  | Financial incentives:Some college/university | 0.113 | 0.097 | -0.075 | 0.305 | 0.030 | 0.071 | -0.108 | 0.169 |
|  | Inoculation strategies:Some college/university | -0.010 | 0.079 | -0.162 | 0.149 | 0.133 | 0.083 | -0.028 | 0.292 |
|  | Media literacy:Some college/university | 0.036 | 0.044 | -0.050 | 0.121 | 0.016 | 0.035 | -0.051 | 0.083 |
|  | Writing letters to elders:Some college/university | 0.001 | 0.166 | -0.353 | 0.355 | -0.005 | 0.133 | -0.259 | 0.241 |
|  | Accuracy prompts:Higher degree | -0.115 | 0.071 | -0.256 | 0.025 | -0.067 | 0.060 | -0.185 | 0.052 |
|  | Bias awareness:Higher degree | -0.182 | 0.050 | -0.277 | -0.087 | 1.126 | 0.197 | 0.741 | 1.512 |
|  | Feedback:Higher degree | -0.027 | 0.252 | -0.539 | 0.458 | -0.017 | 0.206 | -0.421 | 0.384 |
|  | Financial incentives:Higher degree | -0.007 | 0.087 | -0.181 | 0.164 | -0.100 | 0.063 | -0.222 | 0.025 |
|  | Inoculation strategies:Higher degree | 0.092 | 0.098 | -0.098 | 0.287 | 0.199 | 0.092 | 0.011 | 0.377 |
|  | Media literacy:Higher degree | 0.080 | 0.041 | 0.001 | 0.158 | 0.016 | 0.032 | -0.045 | 0.079 |
|  | Writing letters to elders:Higher degree | 0.009 | 1.000 | -1.935 | 1.979 | 0.022 | 1.008 | -1.984 | 1.992 |
| CRT | Accuracy prompts:CRT | -0.041 | 0.073 | -0.186 | 0.102 | 0.006 | 0.060 | -0.112 | 0.123 |
|  | Bias awareness:CRT | -0.245 | 0.101 | -0.444 | -0.050 | 0.592 | 0.418 | -0.206 | 1.420 |
|  | Feedback:CRT | -0.150 | 0.338 | -0.802 | 0.509 | 0.126 | 0.292 | -0.446 | 0.708 |
|  | Financial incentives:CRT | 0.103 | 0.068 | -0.032 | 0.240 | -0.059 | 0.053 | -0.162 | 0.047 |
|  | Inoculation strategies:CRT | -0.077 | 0.103 | -0.276 | 0.119 | 0.111 | 0.117 | -0.118 | 0.341 |
|  | Media literacy:CRT | 0.031 | 0.051 | -0.071 | 0.130 | 0.089 | 0.044 | 0.004 | 0.177 |
|  | Writing letters to elders:CRT | 0.095 | 0.071 | -0.044 | 0.237 | 0.193 | 0.067 | 0.063 | 0.324 |
| Regiond | Accuracy prompts:Antarctica | -0.008 | 0.982 | -1.893 | 1.900 | -0.003 | 1.005 | -1.981 | 1.987 |
|  | Bias awareness:Antarctica | 0.034 | 0.731 | -1.428 | 1.416 | 0.633 | 0.855 | -1.029 | 2.310 |
|  | Feedback:Antarctica | -0.010 | 0.981 | -1.913 | 1.933 | -0.010 | 0.997 | -1.968 | 1.940 |
|  | Financial incentives:Antarctica | -0.006 | 0.981 | -1.850 | 1.867 | 0.019 | 1.007 | -1.995 | 2.064 |
|  | Inoculation strategies:Antarctica | 0.007 | 0.977 | -1.859 | 1.837 | 0.018 | 1.004 | -1.923 | 1.921 |
|  | Media literacy:Antarctica | 0.007 | 1.012 | -1.952 | 1.967 | -0.014 | 0.990 | -1.942 | 1.871 |
|  | Writing letters to elders:Antarctica | 0.008 | 0.997 | -1.976 | 2.039 | -0.000 | 0.990 | -1.945 | 1.976 |
|  | Accuracy prompts:Asia | 0.034 | 0.087 | -0.135 | 0.204 | -0.030 | 0.081 | -0.187 | 0.132 |
|  | Bias awareness:Asia | -0.190 | 0.178 | -0.533 | 0.154 | -0.192 | 0.620 | -1.402 | 0.999 |
|  | Feedback:Asia | -0.011 | 1.031 | -2.033 | 2.001 | -0.012 | 1.004 | -1.969 | 1.922 |
|  | Financial incentives:Asia | -0.002 | 1.013 | -1.916 | 1.958 | 0.002 | 1.007 | -1.961 | 1.952 |
|  | Inoculation strategies:Asia | -0.034 | 0.295 | -0.613 | 0.542 | -0.065 | 0.305 | -0.634 | 0.544 |
|  | Media literacy:Asia | 0.033 | 0.532 | -0.995 | 1.072 | 0.073 | 0.506 | -0.900 | 1.063 |
|  | Writing letters to elders:Asia | 0.008 | 0.990 | -1.898 | 1.953 | 0.009 | 0.988 | -1.921 | 1.979 |
|  | Accuracy prompts:Europe | 0.107 | 0.101 | -0.088 | 0.303 | 0.026 | 0.095 | -0.155 | 0.214 |
|  | Bias awareness:Europe | -0.055 | 0.170 | -0.394 | 0.283 | 0.090 | 0.575 | -1.018 | 1.201 |
|  | Feedback:Europe | 0.014 | 0.984 | -1.939 | 1.906 | 0.015 | 0.988 | -1.949 | 1.952 |
|  | Financial incentives:Europe | -0.001 | 1.041 | -2.040 | 2.048 | -0.006 | 0.981 | -1.945 | 1.861 |
|  | Inoculation strategies:Europe | -0.146 | 0.296 | -0.740 | 0.429 | -0.540 | 0.312 | -1.143 | 0.079 |
|  | Media literacy:Europe | -0.026 | 0.534 | -1.072 | 1.022 | -0.050 | 0.508 | -1.038 | 0.933 |
|  | Writing letters to elders:Europe | -0.028 | 0.871 | -1.714 | 1.720 | 0.017 | 0.914 | -1.772 | 1.811 |
|  | Accuracy prompts:North America | -0.119 | 0.100 | -0.311 | 0.080 | -0.033 | 0.093 | -0.221 | 0.149 |
|  | Bias awareness:North America | 0.046 | 0.295 | -0.536 | 0.624 | -0.508 | 0.826 | -2.135 | 1.084 |
|  | Feedback:North America | 0.051 | 0.940 | -1.760 | 1.906 | 0.061 | 0.915 | -1.711 | 1.848 |
|  | Financial incentives:North America | 0.074 | 0.921 | -1.758 | 1.908 | 0.057 | 0.918 | -1.724 | 1.855 |
|  | Inoculation strategies:North America | -0.152 | 0.288 | -0.730 | 0.394 | -0.419 | 0.302 | -1.004 | 0.176 |
|  | Media literacy:North America | 0.040 | 0.530 | -1.015 | 1.073 | -0.092 | 0.507 | -1.066 | 0.906 |
|  | Writing letters to elders:North America | -0.007 | 1.014 | -1.989 | 1.919 | -0.027 | 1.005 | -1.956 | 1.966 |
|  | Accuracy prompts:Oceania | -0.040 | 0.103 | -0.244 | 0.164 | 0.077 | 0.096 | -0.108 | 0.270 |
|  | Bias awareness:Oceania | -0.194 | 0.168 | -0.528 | 0.142 | -0.097 | 0.574 | -1.225 | 1.042 |
|  | Feedback:Oceania | -0.002 | 0.971 | -1.882 | 1.893 | 0.013 | 0.988 | -1.908 | 1.916 |
|  | Financial incentives:Oceania | -0.008 | 0.989 | -1.964 | 1.921 | -0.012 | 1.007 | -1.954 | 1.970 |
|  | Inoculation strategies:Oceania | -0.243 | 0.414 | -1.069 | 0.538 | -0.559 | 0.436 | -1.431 | 0.270 |
|  | Media literacy:Oceania | -0.016 | 1.030 | -2.054 | 2.006 | 0.014 | 0.991 | -1.893 | 1.977 |
|  | Writing letters to elders:Oceania | 0.009 | 0.983 | -1.900 | 1.921 | 0.005 | 0.985 | -1.906 | 1.977 |
|  | Accuracy prompts:Other | 0.004 | 0.992 | -1.909 | 1.909 | 0.002 | 1.007 | -1.947 | 2.034 |
|  | Bias awareness:Other | 0.005 | 1.012 | -2.046 | 1.967 | -0.013 | 0.963 | -1.905 | 1.784 |
|  | Feedback:Other | -0.004 | 1.001 | -1.987 | 1.998 | 0.014 | 1.025 | -1.979 | 2.050 |
|  | Financial incentives:Other | 0.002 | 1.006 | -1.957 | 1.941 | -0.002 | 0.980 | -1.926 | 1.895 |
|  | Inoculation strategies:Other | -0.005 | 0.996 | -1.956 | 1.926 | -0.023 | 1.003 | -1.977 | 1.934 |
|  | Media literacy:Other | -0.011 | 1.022 | -2.041 | 2.010 | -0.008 | 1.014 | -1.983 | 1.931 |
|  | Writing letters to elders:Other | -0.010 | 1.016 | -2.039 | 1.990 | 0.000 | 0.976 | -1.984 | 1.944 |
|  | Accuracy prompts:South America | -0.004 | 0.998 | -2.038 | 1.965 | -0.001 | 1.027 | -2.073 | 2.033 |
|  | Bias awareness:South America | 0.077 | 0.128 | -0.173 | 0.326 | 0.447 | 0.387 | -0.319 | 1.200 |
|  | Feedback:South America | 0.002 | 1.017 | -2.026 | 2.057 | 0.005 | 1.004 | -1.971 | 2.003 |
|  | Financial incentives:South America | 0.007 | 1.007 | -1.964 | 1.963 | 0.006 | 1.010 | -1.937 | 1.976 |
|  | Inoculation strategies:South America | -0.180 | 0.363 | -0.890 | 0.524 | -0.235 | 0.411 | -1.030 | 0.563 |
|  | Media literacy:South America | 0.002 | 1.004 | -1.941 | 1.974 | -0.015 | 1.012 | -1.988 | 1.934 |
|  | Writing letters to elders:South America | 0.018 | 1.032 | -1.990 | 2.080 | 0.001 | 1.003 | -1.972 | 1.998 |
| Topicse | Accuracy prompts:Health | -0.017 | 1.021 | -2.034 | 1.973 | -0.009 | 0.980 | -1.866 | 1.926 |
|  | Bias awareness:Health | 0.002 | 1.043 | -2.076 | 2.065 | 0.019 | 1.014 | -2.006 | 1.977 |
|  | Feedback:Health | 0.002 | 1.008 | -1.958 | 1.996 | -0.011 | 1.004 | -1.956 | 1.951 |
|  | Financial incentives:Health | 0.000 | 0.966 | -1.860 | 1.879 | 0.000 | 1.026 | -1.994 | 2.022 |
|  | Inoculation strategies:Health | -0.007 | 0.986 | -2.017 | 1.932 | -0.001 | 1.002 | -1.930 | 2.068 |
|  | Media literacy:Health | 0.085 | 0.719 | -1.281 | 1.513 | 0.034 | 0.731 | -1.381 | 1.490 |
|  | Writing letters to elders:Health | -0.006 | 0.995 | -1.939 | 2.017 | 0.011 | 1.017 | -1.997 | 1.972 |
|  | Accuracy prompts:Politics | 0.120 | 0.713 | -1.268 | 1.533 | -0.012 | 0.704 | -1.422 | 1.388 |
|  | Bias awareness:Politics | -0.016 | 0.860 | -1.686 | 1.677 | -0.188 | 0.869 | -1.920 | 1.506 |
|  | Feedback:Politics | 0.010 | 1.005 | -1.955 | 1.971 | -0.002 | 0.991 | -1.955 | 1.957 |
|  | Financial incentives:Politics | 0.076 | 0.926 | -1.721 | 1.938 | 0.026 | 0.913 | -1.790 | 1.807 |
|  | Inoculation strategies:Politics | 0.005 | 0.982 | -1.909 | 1.920 | -0.003 | 1.013 | -2.023 | 1.991 |
|  | Media literacy:Politics | -0.024 | 0.624 | -1.252 | 1.179 | -0.005 | 0.607 | -1.169 | 1.220 |
|  | Writing letters to elders:Politics | -0.014 | 0.992 | -1.973 | 1.921 | 0.017 | 1.010 | -1.973 | 2.007 |
|  | Accuracy prompts:No special topics | -0.001 | 0.986 | -1.877 | 1.905 | -0.014 | 0.993 | -1.966 | 1.911 |
|  | Bias awareness:No special topics | -0.027 | 0.976 | -1.948 | 1.927 | 0.014 | 0.990 | -1.925 | 1.957 |
|  | Feedback:No special topics | 0.049 | 0.909 | -1.719 | 1.823 | 0.058 | 0.925 | -1.799 | 1.887 |
|  | Financial incentives:No special topics | -0.004 | 1.018 | -2.013 | 1.984 | 0.022 | 0.996 | -1.951 | 1.942 |
|  | Inoculation strategies:No special topics | 0.036 | 0.851 | -1.642 | 1.730 | 0.075 | 0.847 | -1.601 | 1.789 |
|  | Media literacy:No special topics | -0.016 | 0.631 | -1.251 | 1.244 | 0.002 | 0.629 | -1.226 | 1.238 |
|  | Writing letters to elders:No special topics | -0.025 | 0.888 | -1.770 | 1.710 | 0.022 | 0.881 | -1.700 | 1.691 |
| Imagef | Accuracy prompts:Yes | 0.116 | 0.715 | -1.264 | 1.537 | -0.004 | 0.707 | -1.449 | 1.385 |
|  | Bias awareness:Yes | 2.5690252450993e-05 | 1.023 | -1.984 | 1.997 | -0.010 | 0.971 | -1.911 | 1.949 |
|  | Feedback:Yes | 0.056 | 0.900 | -1.745 | 1.826 | 0.033 | 0.938 | -1.737 | 1.884 |
|  | Financial incentives:Yes | 0.058 | 0.894 | -1.720 | 1.839 | 0.037 | 0.908 | -1.742 | 1.830 |
|  | Inoculation strategies:Yes | 0.019 | 0.807 | -1.597 | 1.631 | -0.090 | 0.800 | -1.653 | 1.518 |
|  | Media literacy:Yes | 0.036 | 0.629 | -1.222 | 1.257 | 0.124 | 0.620 | -1.104 | 1.297 |
|  | Writing letters to elders:Yes | -0.035 | 0.906 | -1.861 | 1.753 | 0.021 | 0.861 | -1.681 | 1.706 |
|  | Accuracy prompts:Partially Yes | 0.005 | 0.975 | -1.945 | 1.942 | 0.003 | 0.991 | -1.935 | 1.879 |
|  | Bias awareness:Partially Yes | 0.014 | 0.985 | -1.834 | 1.953 | 0.031 | 1.018 | -1.999 | 2.047 |
|  | Feedback:Partially Yes | 0.002 | 0.965 | -1.907 | 1.880 | 0.002 | 0.979 | -1.892 | 1.985 |
|  | Financial incentives:Partially Yes | 0.004 | 1.022 | -1.988 | 2.001 | 0.004 | 1.030 | -2.015 | 2.026 |
|  | Inoculation strategies:Partially Yes | -0.119 | 0.759 | -1.613 | 1.366 | 0.081 | 0.730 | -1.402 | 1.492 |
|  | Media literacy:Partially Yes | 0.003 | 0.993 | -1.901 | 1.918 | 0.004 | 0.991 | -1.954 | 1.922 |
|  | Writing letters to elders:Partially Yes | 0.007 | 1.007 | -1.972 | 1.954 | 0.011 | 1.031 | -1.973 | 2.012 |
| Social media indicatorsg | Accuracy prompts:Yes | -0.007 | 1.025 | -1.975 | 1.950 | -0.010 | 0.995 | -1.965 | 1.948 |
|  | Bias awareness:Yes | 0.007 | 0.989 | -1.934 | 1.939 | 0.002 | 0.992 | -1.939 | 1.948 |
|  | Feedback:Yes | -0.001 | 0.989 | -1.963 | 1.936 | -0.009 | 0.992 | -1.929 | 1.918 |
|  | Financial incentives:Yes | 0.004 | 0.991 | -1.938 | 1.931 | -0.002 | 1.001 | -1.978 | 1.977 |
|  | Inoculation strategies:Yes | 0.185 | 0.665 | -1.105 | 1.474 | 0.353 | 0.637 | -0.873 | 1.636 |
|  | Media literacy:Yes | 0.008 | 1.017 | -1.969 | 1.929 | 0.010 | 1.034 | -2.017 | 2.024 |
|  | Writing letters to elders:Yes | -0.003 | 1.007 | -1.984 | 2.000 | -0.004 | 1.010 | -1.959 | 1.944 |
| Consistencyh | Accuracy prompts:Yes | 0.011 | 1.026 | -2.021 | 2.000 | -0.026 | 1.005 | -1.988 | 1.904 |
|  | Bias awareness:Yes | -0.004 | 1.028 | -2.029 | 2.033 | 0.002 | 0.993 | -1.948 | 1.924 |
|  | Feedback:Yes | -0.011 | 0.990 | -1.936 | 1.903 | 0.002 | 0.984 | -1.966 | 1.901 |
|  | Financial incentives:Yes | 0.003 | 1.027 | -2.046 | 1.989 | 0.006 | 0.994 | -1.929 | 1.921 |
|  | Inoculation strategies:Yes | 0.038 | 0.732 | -1.367 | 1.438 | 0.168 | 0.742 | -1.288 | 1.638 |
|  | Media literacy:Yes | -0.002 | 0.992 | -1.975 | 1.932 | 0.013 | 1.046 | -2.070 | 2.085 |
|  | Writing letters to elders:Yes | -0.000 | 1.019 | -1.965 | 2.012 | 0.012 | 0.985 | -1.943 | 1.891 |
|  | Accuracy prompts:Partially consistent | -0.003 | 0.983 | -1.937 | 1.910 | -0.013 | 0.988 | -1.985 | 1.932 |
|  | Bias awareness:Partially consistent | -0.001 | 1.018 | -2.022 | 2.085 | -0.001 | 0.999 | -1.934 | 1.937 |
|  | Feedback:Partially consistent | 0.002 | 1.016 | -1.990 | 1.977 | 0.007 | 1.000 | -1.920 | 1.933 |
|  | Financial incentives:Partially consistent | -0.008 | 1.015 | -1.975 | 1.978 | 0.002 | 0.984 | -1.923 | 1.954 |
|  | Inoculation strategies:Partially consistent | -0.003 | 1.018 | -2.005 | 2.049 | 0.012 | 0.992 | -1.940 | 1.983 |
|  | Media literacy:Partially consistent | -0.052 | 0.634 | -1.287 | 1.187 | 0.079 | 0.623 | -1.127 | 1.304 |
|  | Writing letters to elders:Partially consistent | 0.012 | 1.002 | -1.914 | 1.974 | 0.002 | 0.985 | -1.944 | 1.896 |
|  | Accuracy prompts:Not involved | 0.016 | 0.820 | -1.557 | 1.601 | 0.030 | 0.833 | -1.613 | 1.620 |
|  | Bias awareness:Not involved | 0.008 | 0.859 | -1.657 | 1.632 | -0.176 | 0.877 | -1.963 | 1.562 |
|  | Feedback:Not involved | 0.057 | 0.938 | -1.791 | 1.876 | 0.053 | 0.918 | -1.757 | 1.809 |
|  | Financial incentives:Not involved | 0.047 | 0.924 | -1.784 | 1.876 | 0.022 | 0.911 | -1.768 | 1.796 |
|  | Inoculation strategies:Not involved | 0.026 | 0.805 | -1.562 | 1.639 | -0.082 | 0.796 | -1.669 | 1.480 |
|  | Media literacy:Not involved | -0.080 | 0.607 | -1.242 | 1.115 | 0.075 | 0.606 | -1.113 | 1.283 |
|  | Writing letters to elders:Not involved | -0.003 | 1.006 | -1.971 | 1.945 | 0.013 | 1.032 | -2.006 | 2.083 |
| Numberi | Accuracy prompts:Yes | -0.014 | 0.805 | -1.590 | 1.567 | 0.011 | 0.819 | -1.595 | 1.612 |
|  | Bias awareness:Yes | 0.004 | 0.978 | -1.940 | 1.963 | 0.007 | 1.013 | -2.001 | 1.987 |
|  | Feedback:Yes | 0.065 | 0.925 | -1.705 | 1.880 | 0.061 | 0.944 | -1.812 | 1.897 |
|  | Financial incentives:Yes | 0.059 | 0.922 | -1.752 | 1.859 | 0.032 | 0.904 | -1.726 | 1.825 |
|  | Inoculation strategies:Yes | -0.141 | 0.668 | -1.458 | 1.131 | -0.264 | 0.648 | -1.515 | 1.053 |
|  | Media literacy:Yes | 0.018 | 0.165 | -0.345 | 0.351 | 0.075 | 0.118 | -0.154 | 0.301 |
|  | Writing letters to elders:Yes | -0.033 | 0.905 | -1.802 | 1.711 | 0.015 | 0.911 | -1.747 | 1.757 |
| Likertj | Accuracy prompts:Odd | -0.007 | 0.990 | -1.988 | 1.989 | 0.017 | 0.999 | -1.946 | 2.016 |
|  | Bias awareness:Odd | 0.008 | 0.861 | -1.676 | 1.708 | -0.187 | 0.864 | -1.875 | 1.491 |
|  | Feedback:Odd | 0.052 | 0.936 | -1.767 | 1.879 | 0.045 | 0.928 | -1.788 | 1.817 |
|  | Financial incentives:Odd | 0.005 | 1.021 | -2.016 | 1.994 | 0.032 | 0.998 | -1.923 | 1.953 |
|  | Inoculation strategies:Odd | 0.124 | 0.248 | -0.406 | 0.583 | 0.278 | 0.248 | -0.214 | 0.746 |
|  | Media literacy:Odd | 0.176 | 0.633 | -1.036 | 1.407 | -0.006 | 0.617 | -1.206 | 1.224 |
|  | Writing letters to elders:Odd | 0.001 | 0.984 | -1.948 | 1.950 | 0.003 | 1.021 | -1.968 | 2.035 |
|  | tau | 0.094 | 0.073 | 0.005 | 0.284 | 0.054 | 0.056 | 0.002 | 0.201 |

a VS Female, b VS 18-29, c High school or less, d vs Africa, e vs Climate, f/g/h/i VS No, j VS Even

**Table S9. Extended outcomes**

| Variablea | | Discrimination ability | | | | Discrimination criterion | | | |
| --- | --- | --- | --- | --- | --- | --- | --- | --- | --- |
| MD | SD | lowerCrI | upperCrI | MD | SD | lowerCrI | upperCrI |
| Pretest |  | -0.041 | 0.079 | -0.189 | 0.113 | -0.179 | 0.065 | -0.306 | -0.051 |
| Posttest1w |  | 0.220 | 0.507 | -0.751 | 1.214 | -0.047 | 0.524 | -1.093 | 0.971 |
| Posttest3w |  | 0.154 | 0.02 | 0.114 | 0.193 | 0.109 | 0.019 | 0.073 | 0.145 |
| Posttest4w |  | 0.181 | 0.029 | 0.126 | 0.238 | 0.168 | 0.025 | 0.117 | 0.217 |
| Posttest7-12d |  | -0.265 | 0.149 | -0.548 | 0.028 | -0.203 | 0.137 | -0.473 | 0.069 |
| Pretest | Accuracy prompts | -0.018 | 1.016 | -1.950 | 1.990 | -0.005 | 0.990 | -1.892 | 1.922 |
|  | Bias awareness | 0.006 | 1.000 | -1.979 | 2.063 | 0.014 | 0.982 | -1.936 | 1.913 |
|  | Feedback | -0.011 | 0.989 | -1.901 | 1.910 | 0.009 | 0.994 | -1.922 | 1.988 |
|  | Financial incentives | 0.024 | 0.971 | -1.883 | 1.900 | 0.007 | 1.007 | -1.965 | 2.040 |
|  | Inoculation strategies | 0.106 | 0.101 | -0.092 | 0.301 | -0.091 | 0.095 | -0.279 | 0.098 |
|  | Inoculation+Feedback | 0.114 | 0.600 | -1.053 | 1.293 | 0.060 | 0.595 | -1.115 | 1.202 |
|  | Media literacy | -0.266 | 0.132 | -0.525 | -0.005 | -0.119 | 0.083 | -0.283 | 0.042 |
|  | Writing letters to elders | 0.001 | 1.007 | -1.960 | 1.950 | 0.009 | 1.005 | -1.976 | 1.957 |
| Posttest1w | Accuracy prompts | -0.001 | 1.013 | -1.979 | 1.976 | 0.018 | 0.967 | -1.912 | 1.906 |
|  | Bias awareness | 0.008 | 0.986 | -1.926 | 1.957 | 0.014 | 0.981 | -1.917 | 1.926 |
|  | Feedback | -0.006 | 0.980 | -1.900 | 1.988 | 0.007 | 1.018 | -1.967 | 1.993 |
|  | Financial incentives | 0.018 | 0.998 | -1.934 | 1.978 | 0.033 | 0.983 | -1.873 | 1.949 |
|  | Inoculation strategies | -0.171 | 0.509 | -1.158 | 0.819 | -0.165 | 0.522 | -1.158 | 0.881 |
|  | Inoculation+Feedback | -0.065 | 0.661 | -1.348 | 1.241 | -0.098 | 0.665 | -1.405 | 1.225 |
|  | Media literacy | -0.076 | 0.171 | -0.415 | 0.272 | -0.091 | 0.148 | -0.384 | 0.211 |
|  | Writing letters to elders | -0.002 | 1.032 | -2.029 | 2.050 | -0.002 | 1.025 | -2.068 | 1.987 |
| Posttest3w | Accuracy prompts | -0.006 | 1.009 | -1.979 | 1.942 | -0.002 | 1.027 | -1.997 | 2.009 |
|  | Bias awareness | -0.004 | 0.990 | -1.929 | 1.961 | -0.005 | 0.987 | -1.917 | 1.947 |
|  | Feedback | 0.036 | 1.030 | -1.980 | 2.075 | 0.021 | 1.031 | -2.014 | 2.042 |
|  | Financial incentives | 0.014 | 1.011 | -1.909 | 2.018 | -0.011 | 1.018 | -2.020 | 1.980 |
|  | Inoculation strategies | 0.012 | 0.993 | -1.943 | 1.955 | -0.004 | 1.027 | -2.050 | 2.032 |
|  | Inoculation+Feedback | -0.010 | 1.000 | -1.959 | 1.955 | -0.002 | 1.022 | -2.000 | 1.966 |
|  | Media literacy | -0.074 | 0.029 | -0.129 | -0.017 | -0.046 | 0.025 | -0.095 | 0.003 |
|  | Writing letters to elders | 0.005 | 1.013 | -1.965 | 1.986 | -0.005 | 1.017 | -1.967 | 1.992 |
| Posttest4w | Accuracy prompts | 0.018 | 0.997 | -1.958 | 1.988 | -0.003 | 1.017 | -2.048 | 1.922 |
|  | Bias awareness | 0.029 | 0.984 | -1.945 | 1.986 | 0.004 | 0.978 | -1.936 | 1.904 |
|  | Feedback | -0.012 | 1.011 | -2.000 | 1.982 | -0.004 | 1.000 | -1.968 | 1.918 |
|  | Financial incentives | 0.006 | 0.975 | -1.876 | 1.934 | -0.016 | 1.019 | -1.987 | 1.933 |
|  | Inoculation strategies | -0.221 | 0.054 | -0.329 | -0.112 | 0.028 | 0.061 | -0.094 | 0.149 |
|  | Inoculation+Feedback | -0.006 | 0.990 | -1.924 | 1.922 | 0.029 | 1.019 | -1.969 | 2.053 |
|  | Media literacy | -0.004 | 0.980 | -1.968 | 1.872 | 0.007 | 0.978 | -1.866 | 1.957 |
|  | Writing letters to elders | -0.030 | 0.044 | -0.115 | 0.055 | -0.077 | 0.040 | -0.156 | 0.001 |
| Posttest7-21d | Accuracy prompts | -0.004 | 0.987 | -1.891 | 1.891 | 0.021 | 1.014 | -1.964 | 1.955 |
|  | Bias awareness | 0.014 | 1.004 | -1.933 | 1.967 | 0.009 | 0.986 | -1.914 | 1.932 |
|  | Feedback | -0.007 | 1.024 | -2.040 | 1.978 | 0.005 | 1.020 | -2.019 | 1.997 |
|  | Financial incentives | -0.007 | 0.981 | -1.871 | 1.906 | -0.013 | 0.998 | -1.942 | 1.956 |
|  | Inoculation strategies | -0.050 | 0.176 | -0.410 | 0.285 | -0.166 | 0.162 | -0.491 | 0.149 |
|  | Inoculation+Feedback | -0.017 | 0.998 | -1.952 | 1.935 | 0.010 | 1.002 | -1.932 | 2.019 |
|  | Media literacy | -0.001 | 0.992 | -1.944 | 1.922 | 0.025 | 1.042 | -2.026 | 2.017 |
|  | Writing letters to elders | -0.028 | 1.013 | -1.976 | 1.946 | 0.011 | 0.986 | -1.902 | 1.968 |
|  | tau | 0.084 | 0.034 | 0.024 | 0.155 | 0.039 | 0.024 | 0.003 | 0.094 |

注：a VS posttest and Contorl

**Table S10. Sensitivity analysis results**

| Variable | | Discrimination ability | | | | Discrimination criterion | | | |
| --- | --- | --- | --- | --- | --- | --- | --- | --- | --- |
| MD | SD | lowerCrI | upperCrI | MD | SD | lowerCrI | upperCrI |
| Gendera | Male | 0.108 | 0.020 | 0.070 | 0.148 | 0.037 | 0.017 | 0.003 | 0.069 |
|  | Other | 0.232 | 0.106 | 0.018 | 0.441 | 0.180 | 0.096 | -0.003 | 0.372 |
|  | Prefer not to say | 0.312 | 0.476 | -0.606 | 1.255 | 0.264 | 0.450 | -0.608 | 1.159 |
| Ageb | Under 18 | 0.007 | 0.093 | -0.171 | 0.186 | -0.099 | 0.079 | -0.249 | 0.055 |
|  | 30-49 | 0.011 | 0.030 | -0.048 | 0.070 | 0.024 | 0.025 | -0.025 | 0.071 |
|  | Over 50 | 0.134 | 0.032 | 0.070 | 0.196 | 0.137 | 0.026 | 0.086 | 0.187 |
| Educationc | Some college/university | 0.124 | 0.032 | 0.062 | 0.186 | 0.062 | 0.026 | 0.011 | 0.113 |
|  | Higher degree | 0.191 | 0.029 | 0.132 | 0.248 | 0.075 | 0.024 | 0.026 | 0.122 |
| CRT |  | 0.409 | 0.033 | 0.343 | 0.474 | 0.311 | 0.027 | 0.257 | 0.365 |
| Regiond | Asia | -0.077 | 0.064 | -0.203 | 0.050 | -0.159 | 0.059 | -0.273 | -0.042 |
|  | Europe | 0.081 | 0.075 | -0.062 | 0.230 | 0.219 | 0.068 | 0.085 | 0.353 |
|  | North America | 0.012 | 0.077 | -0.138 | 0.163 | 0.149 | 0.069 | 0.008 | 0.285 |
|  | Oceania | 0.082 | 0.074 | -0.063 | 0.226 | 0.136 | 0.067 | 0.005 | 0.269 |
| Topicse | politics | 0.142 | 0.736 | -1.334 | 1.578 | 0.198 | 0.733 | -1.266 | 1.636 |
|  | No special topics | -0.074 | 0.763 | -1.602 | 1.383 | -0.004 | 0.753 | -1.470 | 1.446 |
| imagef | Yes | 0.042 | 0.710 | -1.341 | 1.395 | 0.227 | 0.724 | -1.185 | 1.614 |
| consistencyg | partially consistent | 0.068 | 0.780 | -1.389 | 1.609 | -0.161 | 0.799 | -1.723 | 1.422 |
|  | not involved | 0.177 | 0.715 | -1.229 | 1.583 | -0.013 | 0.722 | -1.453 | 1.362 |
| numberh | Yes | 0.103 | 0.698 | -1.250 | 1.452 | -0.021 | 0.731 | -1.411 | 1.433 |
| Vs control |  |  |  |  |  |  |  |  |  |
| Gendera | Accuracy prompts : Male | -0.041 | 0.046 | -0.133 | 0.053 | 0.031 | 0.038 | -0.044 | 0.108 |
|  | Financial incentives : Male | -0.140 | 0.055 | -0.250 | -0.037 | -0.104 | 0.041 | -0.184 | -0.024 |
|  | Media literacy : Male | 0.021 | 0.040 | -0.059 | 0.097 | -0.023 | 0.030 | -0.083 | 0.035 |
|  | Writing letters to elders : Male | 0.088 | 0.044 | -0.001 | 0.174 | 0.034 | 0.041 | -0.046 | 0.113 |
|  | Accuracy prompts : Other | 0.148 | 0.288 | -0.419 | 0.702 | 0.106 | 0.221 | -0.334 | 0.537 |
|  | Financial incentives : Other | 0.054 | 0.214 | -0.373 | 0.478 | -0.065 | 0.170 | -0.394 | 0.262 |
|  | Media literacy : Other | 0.019 | 0.983 | -1.870 | 1.939 | 0.004 | 0.996 | -1.992 | 1.920 |
|  | Writing letters to elders : Other | -0.228 | 0.159 | -0.533 | 0.081 | 0.071 | 0.145 | -0.211 | 0.361 |
|  | Accuracy prompts : Prefer not to say | -0.180 | 0.556 | -1.241 | 0.933 | -0.075 | 0.532 | -1.141 | 0.984 |
|  | Financial incentives : Prefer not to say | 0.014 | 0.996 | -1.985 | 1.969 | 0.001 | 0.988 | -1.925 | 1.915 |
|  | Media literacy : Prefer not to say | 0.007 | 1.014 | -1.976 | 1.925 | 0.001 | 1.021 | -2.021 | 2.011 |
|  | Writing letters to elders : Prefer not to say | 0.007 | 1.014 | -1.991 | 1.991 | 0.002 | 0.973 | -1.918 | 1.911 |
| Ageb | Accuracy prompts : Under 18 | -0.109 | 0.188 | -0.488 | 0.265 | 0.241 | 0.162 | -0.074 | 0.561 |
|  | Financial incentives : Under 18 | 0.205 | 0.228 | -0.248 | 0.665 | -0.028 | 0.176 | -0.377 | 0.327 |
|  | Media literacy : Under 18 | 0.125 | 0.196 | -0.259 | 0.517 | 0.197 | 0.151 | -0.098 | 0.502 |
|  | Writing letters to elders : Under 18 | 0.138 | 0.211 | -0.271 | 0.545 | -0.033 | 0.199 | -0.415 | 0.355 |
|  | Accuracy prompts : 30-49 | 0.079 | 0.058 | -0.034 | 0.192 | -0.036 | 0.047 | -0.129 | 0.054 |
|  | Financial incentives : 30-49 | -0.165 | 0.067 | -0.298 | -0.036 | -0.137 | 0.049 | -0.234 | -0.043 |
|  | Media literacy : 30-49 | 0.115 | 0.059 | 0.000 | 0.231 | 0.094 | 0.045 | 0.008 | 0.183 |
|  | Writing letters to elders : 30-49 | -0.008 | 0.997 | -1.988 | 1.914 | 0.000 | 0.993 | -1.974 | 1.941 |
|  | Accuracy prompts : over 50 | 0.061 | 0.067 | -0.066 | 0.193 | -0.018 | 0.054 | -0.122 | 0.088 |
|  | Financial incentives : over 50 | -0.371 | 0.076 | -0.517 | -0.226 | -0.307 | 0.054 | -0.414 | -0.198 |
|  | Media literacy : over 50 | 0.060 | 0.057 | -0.047 | 0.173 | 0.156 | 0.044 | 0.069 | 0.242 |
|  | Writing letters to elders : over 50 | -0.029 | 1.010 | -2.029 | 1.976 | 0.007 | 1.007 | -1.978 | 1.952 |
| Educationc | Accuracy prompts : Some college/university | -0.040 | 0.064 | -0.162 | 0.084 | 0.016 | 0.053 | -0.088 | 0.117 |
|  | Financial incentives : Some college/university | 0.091 | 0.094 | -0.091 | 0.273 | 0.063 | 0.071 | -0.074 | 0.203 |
|  | Media literacy : Some college/university | 0.062 | 0.055 | -0.043 | 0.173 | 0.062 | 0.042 | -0.022 | 0.145 |
|  | Writing letters to elders : Some college/university | 0.002 | 0.191 | -0.396 | 0.408 | -0.006 | 0.192 | -0.328 | 0.312 |
|  | Accuracy prompts : Higher degree | -0.148 | 0.072 | -0.290 | -0.006 | -0.039 | 0.059 | -0.154 | 0.076 |
|  | Financial incentives : Higher degree | -0.041 | 0.084 | -0.205 | 0.119 | -0.069 | 0.064 | -0.196 | 0.056 |
|  | Media literacy : Higher degree | 0.071 | 0.049 | -0.024 | 0.166 | 0.060 | 0.039 | -0.016 | 0.135 |
|  | Writing letters to elders : Higher degree | 0.001 | 0.988 | -1.939 | 1.966 | -0.016 | 1.003 | -2.018 | 1.982 |
| CRT | Accuracy prompts:CRT | -0.063 | 0.075 | -0.210 | 0.081 | 0.010 | 0.060 | -0.106 | 0.131 |
|  | Financial incentives:CRT | 0.091 | 0.073 | -0.051 | 0.232 | -0.049 | 0.054 | -0.155 | 0.059 |
|  | Media literacy:CRT | 0.111 | 0.074 | -0.031 | 0.258 | 0.055 | 0.055 | -0.054 | 0.161 |
|  | Writing letters to elders:CRT | 0.085 | 0.076 | -0.059 | 0.232 | 0.146 | 0.068 | 0.014 | 0.279 |
| Regiond | Accuracy prompts : Asia | 0.048 | 0.093 | -0.139 | 0.229 | 0.006 | 0.085 | -0.158 | 0.170 |
|  | Financial incentives : Asia | -0.002 | 1.025 | -2.038 | 2.001 | 0.016 | 0.987 | -1.961 | 1.910 |
|  | Media literacy : Asia | 0.005 | 0.978 | -1.961 | 1.910 | -0.007 | 0.982 | -1.929 | 1.978 |
|  | Writing letters to elders : Asia | 0.009 | 0.993 | -1.993 | 1.973 | 0.003 | 1.029 | -1.948 | 1.976 |
|  | Accuracy prompts : Europe | 0.100 | 0.108 | -0.116 | 0.313 | 0.028 | 0.097 | -0.159 | 0.222 |
|  | Financial incentives : Europe | -0.025 | 0.981 | -1.957 | 1.943 | -0.002 | 1.011 | -1.975 | 1.957 |
|  | Media literacy : Europe | -0.001 | 1.002 | -1.910 | 1.956 | 0.002 | 1.005 | -1.969 | 1.941 |
|  | Writing letters to elders : Europe | -0.027 | 0.898 | -1.824 | 1.693 | 0.016 | 0.877 | -1.671 | 1.684 |
|  | Accuracy prompts : North America | -0.079 | 0.111 | -0.298 | 0.142 | -0.056 | 0.098 | -0.243 | 0.137 |
|  | Financial incentives : North America | 0.081 | 0.907 | -1.724 | 1.820 | 0.033 | 0.921 | -1.778 | 1.856 |
|  | Media literacy : North America | 0.018 | 0.890 | -1.692 | 1.766 | 0.007 | 0.877 | -1.672 | 1.746 |
|  | Writing letters to elders : North America | -0.005 | 1.017 | -2.012 | 1.967 | -0.001 | 1.024 | -1.963 | 2.034 |
|  | Accuracy prompts : Oceania | -0.065 | 0.108 | -0.281 | 0.148 | 0.071 | 0.096 | -0.113 | 0.266 |
|  | Financial incentives : Oceania | 0.003 | 0.997 | -1.950 | 2.005 | 0.003 | 0.997 | -1.995 | 1.912 |
|  | Media literacy : Oceania | -0.001 | 0.996 | -1.905 | 1.929 | 0.000 | 1.017 | -2.002 | 1.940 |
|  | Writing letters to elders : Oceania | 0.000 | 0.962 | -1.945 | 1.924 | -0.003 | 0.976 | -1.918 | 1.867 |
| Topicse | Accuracy prompts : Politics | 0.107 | 0.699 | -1.289 | 1.459 | 0.006 | 0.704 | -1.350 | 1.387 |
|  | Financial incentives : Politics | 0.059 | 0.920 | -1.702 | 1.834 | 0.042 | 0.893 | -1.705 | 1.755 |
|  | Media literacy : Politics | -0.008 | 0.897 | -1.795 | 1.762 | -0.001 | 0.893 | -1.801 | 1.794 |
|  | Writing letters to elders : Politics | -0.013 | 0.982 | -1.886 | 1.904 | -0.008 | 1.007 | -2.070 | 1.974 |
|  | Accuracy prompts : No special topics | 0.016 | 1.008 | -1.992 | 2.009 | -0.008 | 0.995 | -1.963 | 1.943 |
|  | Financial incentives : No special topics | 0.021 | 0.997 | -1.910 | 1.964 | 0.014 | 1.037 | -2.000 | 2.042 |
|  | Media literacy : No special topics | -0.006 | 0.976 | -1.854 | 1.896 | 0.028 | 1.007 | -1.962 | 2.017 |
|  | Writing letters to elders : No special topics | -0.031 | 0.915 | -1.825 | 1.767 | 0.005 | 0.912 | -1.815 | 1.757 |
| Imagef | Accuracy prompts : Yes | 0.107 | 0.702 | -1.259 | 1.495 | 0.008 | 0.705 | -1.374 | 1.355 |
|  | Financial incentives : Yes | 0.072 | 0.917 | -1.770 | 1.879 | 0.030 | 0.913 | -1.732 | 1.855 |
|  | Media literacy : Yes | -0.011 | 0.887 | -1.707 | 1.698 | -0.003 | 0.904 | -1.793 | 1.781 |
|  | Writing letters to elders : Yes | -0.019 | 0.885 | -1.763 | 1.736 | 0.010 | 0.937 | -1.868 | 1.872 |
| Consistencyg | Accuracy prompts : Partially consistent | -0.021 | 1.013 | -2.052 | 1.969 | -0.007 | 0.975 | -1.885 | 1.980 |
|  | Financial incentives : Partially consistent | -0.021 | 0.964 | -1.897 | 1.825 | 0.015 | 1.001 | -1.921 | 1.950 |
|  | Media literacy : Partially consistent | -0.009 | 0.886 | -1.711 | 1.676 | -0.013 | 0.899 | -1.768 | 1.724 |
|  | Writing letters to elders : Partially consistent | -0.012 | 0.994 | -1.957 | 1.918 | 0.003 | 0.988 | -1.868 | 1.953 |
|  | Accuracy prompts : Not involved | 0.005 | 0.818 | -1.585 | 1.628 | 0.007 | 0.826 | -1.622 | 1.617 |
|  | Financial incentives : Not involved | 0.091 | 0.927 | -1.764 | 1.858 | 0.040 | 0.915 | -1.712 | 1.784 |
|  | Media literacy : Not involved | 0.022 | 0.983 | -1.912 | 1.931 | 0.000 | 0.987 | -1.959 | 1.920 |
|  | Writing letters to elders : Not involved | 0.002 | 0.975 | -1.914 | 1.946 | -0.002 | 1.008 | -1.944 | 1.921 |
| Numberh | Accuracy prompts : Yes | 0.001 | 0.827 | -1.623 | 1.643 | 0.006 | 0.817 | -1.607 | 1.623 |
|  | Financial incentives : Yes | 0.080 | 0.930 | -1.816 | 1.890 | 0.017 | 0.912 | -1.789 | 1.843 |
|  | Media literacy : Yes | 0.037 | 0.979 | -1.952 | 1.957 | 0.006 | 1.002 | -1.975 | 1.911 |
|  | Writing letters to elders : Yes | -0.056 | 0.918 | -1.886 | 1.708 | 0.017 | 0.919 | -1.834 | 1.842 |
|  | tau | 0.108 | 0.109 | 0.004 | 0.373 | 0.072 | 0.096 | 0.002 | 0.327 |

a VS Female, b VS 18-29, c High school or less, d vs Africa, e vs Climate, f/g/h VS No

**Publishing Biased Results**

**Figure S3.** Funnel plot of publication bias for discriminatory ability in preliminary analyses

**Figure S4.** Funnel plot of publication bias for discriminant criteria in preliminary analyses

**Figure S5.** Funnel plot of publication bias for discriminatory ability in extended analyses

**Figure S6.** Funnel plot of publication bias for discriminatory criteria inextended analyses
